# Supplementary material for: Transition-metal-free electrophilic trifluoromethylthiolation with sodium trifluoromethanesulfinate at room temperature
Source: Royal Society of Chemistry journal article supplement (doi:10.1039/c6qo00622a), 2016-11-29
Supplement: c6qo00622a1.pdf [file c6qo00622a1.pdf]

Electronic Supplementary Information

# **Transition-Metal-Free Electrophilic Trifluoromethylthiolation with Sodium Trifluoromethanesulfinate at Room Temperature**

Mei-jie Bu, Guo-ping Lu and Chun Cai\*

Chemical Engineering College, Nanjing University of Science & Technology  
Nanjing, Jiangsu 210094, P. R. China

[c.cai@mail.njust.edu.cn](mailto:c.cai@mail.njust.edu.cn)

## **Content**

|                                                                 |     |
|-----------------------------------------------------------------|-----|
| 1. General Information.....                                     | S2  |
| 2. Synthesis of Starting Materials .....                        | S2  |
| 3. Experimental and Characterization of Reaction Products ..... | S4  |
| 4. Experiments for the Mechanistic Study .....                  | S12 |
| 5. References.....                                              | S14 |
| 6. Copies of NMR Spectra.....                                   | S15 |

## 1. General Information

Unless otherwise noted, all reactions were carried out under an atmosphere of argon in oven-dried Schlenk tubes. Dry solvents (water  $\leq$  50 ppm) were purchased from Energy Chemical and stored over molecular sieves under argon atmosphere. Commercially available chemicals were used without any further purification. The products were purified by column chromatography over silica gel. Analytical thin-layer chromatography was performed on glass plates precoated with silica gel, and compounds were detected by visualization under an ultraviolet lamp (254 nm).  $^1\text{H}$ ,  $^{13}\text{C}$  and  $^{19}\text{F}$  NMR spectra were recorded on an AVANCE III 500 Bruker spectrometer operating at 500 MHz, 125 MHz and 470 MHz, respectively. Chemical shifts were reported in ppm. Coupling constants ( $J$  values) are reported in Hz. Low-resolution mass spectra (EI) were obtained at 70 eV on a 5975C Mass Selective Detector. Elemental analysis was performed on a C/H mode.

## 2. Synthesis of Starting Materials

1-Benzyl-1*H*-indole,<sup>1</sup> 2-phenyl-1*H*-pyrrole,<sup>2</sup> and 1-(4-methoxyphenyl)-1*H*-pyrrole<sup>3</sup> were synthesized according to previous reported procedures.

### 1-Benzyl-1*H*-indole (1c).

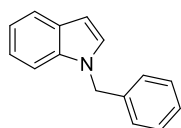

Chemical Formula:  $\text{C}_{15}\text{H}_{13}\text{N}$   
Exact Mass: 207.1048  
Elemental Analysis: C, 86.92; H, 6.32; N, 6.76

$^1\text{H}$  NMR (500 MHz,  $\text{CDCl}_3$ )  $\delta$  7.71 (d,  $J = 7.7$  Hz, 1H), 7.37 – 7.26 (m, 4H), 7.25 – 7.20 (m, 1H), 7.19 – 7.09 (m, 4H), 6.61 (d,  $J = 3.0$  Hz, 1H), 5.31 (s, 2H).

$^{13}\text{C}$  NMR (125 MHz,  $\text{CDCl}_3$ )  $\delta$  137.8, 136.6, 129.0, 128.5, 127.8, 127.0, 121.9, 121.2, 119.8, 109.9, 101.9, 50.3.

MS (EI)  $m/z$ : 207 ( $\text{M}^+$ ).

Analytical data are in accordance with the literature values.<sup>1</sup>

### 2-Phenyl-1*H*-pyrrole (4a).

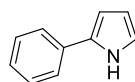

Chemical Formula:  $\text{C}_{10}\text{H}_9\text{N}$   
Exact Mass: 143.0735  
Elemental Analysis: C, 83.88; H, 6.34; N, 9.78

$^1\text{H}$  NMR (500 MHz,  $\text{CDCl}_3$ )  $\delta$  8.38 (br, 1H), 7.50 (d,  $J = 7.9$  Hz, 2H), 7.40 (t,  $J = 7.7$  Hz, 2H), 7.26 (t,  $J = 7.4$  Hz, 1H), 6.86 (q,  $J = 2.4$  Hz, 1H), 6.60 (p,  $J = 1.7$  Hz, 1H), 6.36 (q,  $J = 2.9$  Hz, 1H).

$^{13}\text{C}$  NMR (125 MHz,  $\text{CDCl}_3$ )  $\delta$  132.9, 132.3, 129.1, 126.4, 124.0, 119.1, 110.3, 106.3.

MS (EI)  $m/z$ : 143 ( $\text{M}^+$ ).

Analytical data are in accordance with the literature values.<sup>2</sup>

### 1-(4-Methoxyphenyl)-1H-pyrrole (4b).

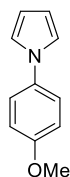

Chemical Formula: C<sub>11</sub>H<sub>11</sub>NO  
Exact Mass: 173.0841  
Elemental Analysis: C, 76.28; H, 6.40; N, 8.09; O, 9.24

<sup>1</sup>H NMR (500 MHz, CDCl<sub>3</sub>) δ 7.37 (d, *J* = 8.9 Hz, 2H), 7.08 (t, *J* = 2.2 Hz, 2H), 7.01 (d, *J* = 9.0 Hz, 2H), 6.41 (t, *J* = 2.2 Hz, 2H), 3.88 (s, 3H).

<sup>13</sup>C NMR (125 MHz, CDCl<sub>3</sub>) δ 157.9, 134.7, 122.3, 119.8, 114.8, 110.1, 55.7.

MS (EI) *m/z*: 173 (M<sup>+</sup>).

Analytical data are in accordance with the literature values.<sup>3</sup>

### General procedure for the synthesis of enamines:

Enamines were synthesized according to a modified procedure of Brandt.<sup>4</sup> Ketones (2 mmol), amine (3 mmol), and acetic acid (48 mg, 0.8 mmol) in 2 mL of ethanol were stirred at room temperature or refluxed overnight. The resulting mixture was concentrated *in vacuo*, dissolved with EtOAc (30 mL), washed with water (2 x 8 mL) and brine (2 x 8 mL). The organic phase was concentrated and purified by column chromatography.

### Methyl (Z)-3-(benzylamino)but-2-enoate (5a).

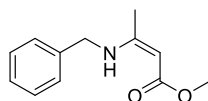

Chemical Formula: C<sub>12</sub>H<sub>15</sub>NO<sub>2</sub>  
Exact Mass: 205.1103  
Elemental Analysis: C, 70.22; H, 7.37; N, 6.82; O, 15.59

<sup>1</sup>H NMR (500 MHz, CDCl<sub>3</sub>) δ 8.95 (br, 1H), 7.36 – 7.31 (m, 2H), 7.29 – 7.22 (m, 3H), 4.54 (s, 1H), 4.42 (d, *J* = 6.4 Hz, 2H), 3.63 (s, 3H), 1.91 (s, 3H).

<sup>13</sup>C NMR (125 MHz, CDCl<sub>3</sub>) δ 171.0, 162.1, 138.8, 128.9, 127.5, 126.8, 82.9, 50.1, 46.9, 19.5.

MS (EI) *m/z*: 205 (M<sup>+</sup>).

Analytical data are in accordance with the literature values.<sup>5</sup>

### (Z)-4-(benzylamino)pent-3-en-2-one (5b).

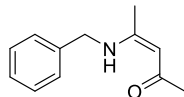

Chemical Formula: C<sub>12</sub>H<sub>15</sub>NO  
Exact Mass: 189.1154  
Elemental Analysis: C, 76.16; H, 7.99; N, 7.40; O, 8.45

<sup>1</sup>H NMR (500 MHz, CDCl<sub>3</sub>) δ 11.14 (br, 1H), 7.34 – 7.27 (m, 2H), 7.22 (t, *J* = 7.4 Hz, 3H), 5.01 (s, 1H), 4.40 (d, *J* = 6.4 Hz, 2H), 2.00 (s, 3H), 1.87 (s, 3H).

<sup>13</sup>C NMR (126 MHz, CDCl<sub>3</sub>) δ 195.4, 163.2, 138.2, 128.9, 127.5, 126.8, 96.0, 46.8, 29.0, 19.0.

MS (EI) *m/z*: 189 (M<sup>+</sup>).

Analytical data are in accordance with the literature values.<sup>6</sup>

### (Z)-3-(Benzylamino)-1-phenylbut-2-en-1-one (5c).

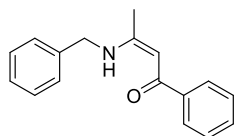

Chemical Formula: C<sub>17</sub>H<sub>17</sub>NO  
Exact Mass: 251.1310  
Elemental Analysis: C, 81.24; H, 6.82; N, 5.57; O, 6.37

<sup>1</sup>H NMR (500 MHz, CDCl<sub>3</sub>) δ 11.79 (br, 1H), 7.92 (dd, *J* = 7.8, 1.8 Hz, 2H), 7.46 – 7.39 (m, 3H), 7.39 – 7.34 (m, 2H), 7.30 (dd, *J* = 14.8, 7.2 Hz, 3H), 5.77 (s, 1H), 4.52 (d, *J* = 6.3 Hz, 2H), 2.05 (s, 3H).

<sup>13</sup>C NMR (125 MHz, CDCl<sub>3</sub>) δ 188.2, 165.1, 140.5, 137.9, 130.7, 129.0, 128.3, 127.7, 127.1, 127.1, 92.8, 47.2, 19.7.

MS (EI) *m/z*: 251 (M<sup>+</sup>).

Analytical data are in accordance with the literature values.<sup>6</sup>

### Ethyl (Z)-3-(benzylamino)-3-phenylacrylate (5e).

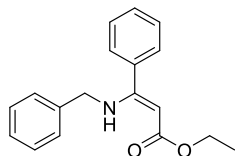

Chemical Formula: C<sub>18</sub>H<sub>19</sub>NO<sub>2</sub>  
Exact Mass: 281.1416  
Elemental Analysis: C, 76.84; H, 6.81; N, 4.98; O, 11.37

<sup>1</sup>H NMR (500 MHz, CDCl<sub>3</sub>) δ 8.93 (br, 1H), 7.37 (dq, *J* = 18.6, 6.7, 5.7 Hz, 5H), 7.30 (t, *J* = 7.4 Hz, 2H), 7.24 (t, *J* = 7.3 Hz, 1H), 7.18 (d, *J* = 7.4 Hz, 2H), 4.69 (s, 1H), 4.28 (d, *J* = 6.5 Hz, 2H), 4.17 (q, *J* = 7.1 Hz, 2H), 1.29 (t, *J* = 7.1 Hz, 3H).

<sup>13</sup>C NMR (125 MHz, CDCl<sub>3</sub>) δ 170.5, 164.9, 139.4, 136.1, 129.4, 128.7, 128.5, 128.0, 127.3, 127.0, 86.4, 58.9, 48.5, 14.7.

MS (EI) *m/z*: 281 (M<sup>+</sup>).

Analytical data are in accordance with the literature values.<sup>5</sup>

## 3. Experimental and Characterization of Reaction Products

### General procedure for the electrophilic trifluoromethylthiolation with CF<sub>3</sub>SO<sub>2</sub>Na:

A 10-mL Schlenk tube with a magnetic stirring bar was charged with triphenylphosphine (0.6 mmol, 158 mg), chlorophthalimide (0.3 mmol, 55 mg) and sodium trifluoromethanesulfinate (0.3 mmol, 47 mg). The tube was evacuated and backfilled with dry nitrogen (this operation was repeated three times). Indole, pyrrole, or enamine (0.2 mmol) dissolved in dry acetonitrile (2 mL) was added by syringe. The resulting mixture was stirred at room temperature before the solvent was removed under reduced pressure. Purification of the crude product was achieved by column chromatography.

### 3-((Trifluoromethyl)thio)-1H-indole (3a).

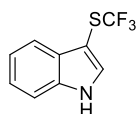

Chemical Formula: C<sub>9</sub>H<sub>6</sub>F<sub>3</sub>NS  
Exact Mass: 217.0173  
Elemental Analysis: C, 49.77; H, 2.78; F, 26.24; N, 6.45; S, 14.76

<sup>1</sup>H NMR (500 MHz, CDCl<sub>3</sub>) δ 8.45 (br, 1H), 7.92 – 7.79 (m, 1H), 7.51 (d, *J* = 2.8 Hz, 1H), 7.45 –

7.39 (m, 1H), 7.37 – 7.28 (m, 2H).

$^{13}\text{C}$  NMR (125 MHz,  $\text{CDCl}_3$ )  $\delta$  136.2, 133.0, 129.6 (q,  $J = 309.7$  Hz), 129.6, 123.6, 121.8, 119.5, 111.8, 95.7.

$^{19}\text{F}$  NMR (470 MHz,  $\text{CDCl}_3$ )  $\delta$  -44.5.

MS (EI)  $m/z$ : 217 ( $\text{M}^+$ ).

Anal. Calcd for  $\text{C}_9\text{H}_6\text{F}_3\text{NS}$ : C, 49.77; H, 2.78. Found: C, 49.40; H, 2.87.

Analytical data are in accordance with the literature values.<sup>7</sup>

### 1-Methyl-3-((trifluoromethyl)thio)-1H-indole (3b).

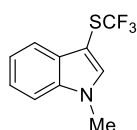

Chemical Formula:  $\text{C}_{10}\text{H}_8\text{F}_3\text{NS}$   
Exact Mass: 231.0330  
Elemental Analysis: C, 51.94; H, 3.49; F, 24.65; N, 6.06; S, 13.86

$^1\text{H}$  NMR (500 MHz,  $\text{CDCl}_3$ )  $\delta$  7.85 (d,  $J = 7.6$  Hz, 1H), 7.40 – 7.31 (m, 4H), 3.80 (s, 3H).

$^{13}\text{C}$  NMR (125 MHz,  $\text{CDCl}_3$ )  $\delta$  137.4, 137.1, 129.6 (q,  $J = 310.4$  Hz), 130.4, 123.1, 121.4, 119.5, 110.0, 93.2, 33.3.

$^{19}\text{F}$  NMR (470 MHz,  $\text{CDCl}_3$ )  $\delta$  -44.8.

MS (EI)  $m/z$ : 231 ( $\text{M}^+$ ).

Anal. Calcd for  $\text{C}_{10}\text{H}_8\text{F}_3\text{NS}$ : C, 51.94; H, 3.49. Found: C, 52.27; H, 3.58.

Analytical data are in accordance with the literature values.<sup>7</sup>

### 1-Benzyl-3-((trifluoromethyl)thio)-1H-indole (3c).

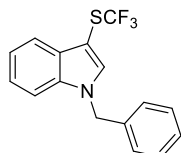

Chemical Formula:  $\text{C}_{16}\text{H}_{12}\text{F}_3\text{NS}$   
Exact Mass: 307.0643  
Elemental Analysis: C, 62.53; H, 3.94; F, 18.55; N, 4.56; S, 10.43

$^1\text{H}$  NMR (500 MHz,  $\text{CDCl}_3$ )  $\delta$  7.85 (d,  $J = 7.0$  Hz, 1H), 7.47 (s, 1H), 7.36 – 7.28 (m, 6H), 7.16 (d,  $J = 6.5$  Hz, 2H), 5.34 (s, 2H).

$^{13}\text{C}$  NMR (125 MHz,  $\text{CDCl}_3$ )  $\delta$  137.0, 136.5, 136.2, 130.6, 129.4 (q,  $J = 314.8$  Hz), 129.1, 128.3, 127.1, 123.3, 121.6, 119.7, 110.6, 94.2, 50.8.

$^{19}\text{F}$  NMR (470 MHz,  $\text{CDCl}_3$ )  $\delta$  -44.7.

MS (EI)  $m/z$ : 307 ( $\text{M}^+$ ).

Anal. Calcd for  $\text{C}_{16}\text{H}_{12}\text{F}_3\text{NS}$ : C, 62.53; H, 3.94. Found: C, 62.31; H, 4.03.

Analytical data are in accordance with the literature values.<sup>8</sup>

### 2-Methyl-3-((trifluoromethyl)thio)-1H-indole (3d).

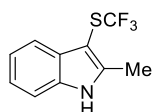

Chemical Formula:  $\text{C}_{10}\text{H}_8\text{F}_3\text{NS}$   
Exact Mass: 231.0330  
Elemental Analysis: C, 51.94; H, 3.49; F, 24.65; N, 6.06; S, 13.86

$^1\text{H}$  NMR (500 MHz,  $\text{CDCl}_3$ )  $\delta$  8.29 (br, 1H), 7.73 (d,  $J = 6.9$  Hz, 1H), 7.35 – 7.29 (m, 1H), 7.27 –

7.22 (m, 2H), 2.57 (s, 3H).

$^{13}\text{C}$  NMR (125 MHz,  $\text{CDCl}_3$ )  $\delta$  143.7, 135.2, 130.7, 129.9 (q,  $J = 311.0$  Hz), 122.7, 121.5, 118.8, 110.9, 92.7, 12.2.

$^{19}\text{F}$  NMR (470 MHz,  $\text{CDCl}_3$ )  $\delta$  -44.4.

MS (EI)  $m/z$ : 231 ( $\text{M}^+$ ).

Anal. Calcd for  $\text{C}_{10}\text{H}_8\text{F}_3\text{NS}$ : C, 51.94; H, 3.49. Found: C, 51.59; H, 3.55.

Analytical data are in accordance with the literature values.<sup>7</sup>

### 2-Phenyl-3-((trifluoromethyl)thio)-1H-indole (3e).

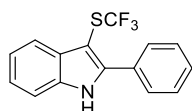

Chemical Formula:  $\text{C}_{15}\text{H}_{10}\text{F}_3\text{NS}$

Exact Mass: 293.0486

Elemental Analysis: C, 61.43; H, 3.44; F, 19.43; N, 4.78; S, 10.93

$^1\text{H}$  NMR (500 MHz,  $\text{CDCl}_3$ )  $\delta$  8.56 (br, 1H), 7.93 – 7.86 (m, 1H), 7.83 – 7.74 (m, 2H), 7.58 – 7.52 (m, 2H), 7.52 – 7.47 (m, 1H), 7.43 (dt,  $J = 7.4, 3.0$  Hz, 1H), 7.37 – 7.30 (m, 2H).

$^{13}\text{C}$  NMR (125 MHz,  $\text{CDCl}_3$ )  $\delta$  144.5, 135.5, 131.6, 130.8, 129.9 (q,  $J = 310.8$  Hz), 129.4, 129.0, 128.9, 123.8, 122.0, 119.9, 111.4, 92.6.

$^{19}\text{F}$  NMR (470 MHz,  $\text{CDCl}_3$ )  $\delta$  -43.4.

MS (EI)  $m/z$ : 293 ( $\text{M}^+$ ).

Anal. Calcd for  $\text{C}_{15}\text{H}_{10}\text{F}_3\text{NS}$ : C, 61.43; H, 3.44. Found: C, 61.19; H, 3.51.

Analytical data are in accordance with the literature values.<sup>7</sup>

### 4-Methyl-3-((trifluoromethyl)thio)-1H-indole (3f).

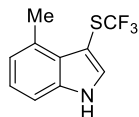

Chemical Formula:  $\text{C}_{10}\text{H}_8\text{F}_3\text{NS}$

Exact Mass: 231.0330

Elemental Analysis: C, 51.94; H, 3.49; F, 24.65; N, 6.06; S, 13.86

$^1\text{H}$  NMR (500 MHz,  $\text{CDCl}_3$ )  $\delta$  8.47 (br, 1H), 7.50 (d,  $J = 2.8$  Hz, 1H), 7.26 (d,  $J = 8.1$  Hz, 1H), 7.20 (t,  $J = 7.6$  Hz, 1H), 7.03 (d,  $J = 7.1$  Hz, 1H), 2.88 (s, 3H).

$^{13}\text{C}$  NMR (125 MHz,  $\text{CDCl}_3$ )  $\delta$  136.5, 134.2, 131.8, 129.3 (q,  $J = 309.3$  Hz), 126.9, 123.6, 109.9, 95.2, 19.5.

$^{19}\text{F}$  NMR (470 MHz,  $\text{CDCl}_3$ )  $\delta$  -45.8.

MS (EI)  $m/z$ : 231 ( $\text{M}^+$ ).

Anal. Calcd for  $\text{C}_{10}\text{H}_8\text{F}_3\text{NS}$ : C, 51.94; H, 3.49. Found: C, 51.59; H, 3.55.

Analytical data are in accordance with the literature values.<sup>7</sup>

### 5-Methyl-3-((trifluoromethyl)thio)-1H-indole (3g).

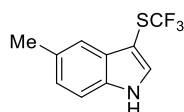

Chemical Formula:  $\text{C}_{10}\text{H}_8\text{F}_3\text{NS}$

Exact Mass: 231.0330

Elemental Analysis: C, 51.94; H, 3.49; F, 24.65; N, 6.06; S, 13.86

$^1\text{H}$  NMR (500 MHz,  $\text{CDCl}_3$ )  $\delta$  8.39 (br, 1H), 7.62 (s, 1H), 7.47 (d,  $J = 2.8$  Hz, 1H), 7.31 (d,  $J = 8.3$  Hz, 1H), 7.15 (dd,  $J = 8.3, 1.2$  Hz, 1H), 2.53 (s, 3H).

$^{13}\text{C}$  NMR (125 MHz,  $\text{CDCl}_3$ )  $\delta$  134.5, 133.0, 131.4, 129.8, 129.6 (q,  $J = 310.2$  Hz), 125.2, 119.0, 111.5, 95.0, 21.7.

$^{19}\text{F}$  NMR (470 MHz,  $\text{CDCl}_3$ )  $\delta$  -44.6.

MS (EI)  $m/z$ : 231 ( $\text{M}^+$ ).

Anal. Calcd for  $\text{C}_{10}\text{H}_8\text{F}_3\text{NS}$ : C, 51.94; H, 3.49. Found: C, 52.20; H, 3.40.

Analytical data are in accordance with the literature values.<sup>7</sup>

### 5-Methoxy-3-((trifluoromethyl)thio)-1H-indole (3h).

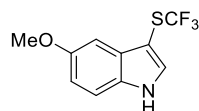

Chemical Formula:  $\text{C}_{10}\text{H}_8\text{F}_3\text{NOS}$

Exact Mass: 247.0279

Elemental Analysis: C, 48.58; H, 3.26; F, 23.05; N, 5.67; O, 6.47; S, 12.97

$^1\text{H}$  NMR (500 MHz,  $\text{CDCl}_3$ )  $\delta$  8.52 (br, 1H), 7.49 (d,  $J = 2.8$  Hz, 1H), 7.30 (d,  $J = 8.8$  Hz, 1H), 7.24 (d,  $J = 2.4$  Hz, 1H), 6.95 (dd,  $J = 8.8, 2.4$  Hz, 1H), 3.91 (s, 3H).

$^{13}\text{C}$  NMR (125 MHz,  $\text{CDCl}_3$ )  $\delta$  155.7, 133.4, 131.1, 130.4, 129.6 (q,  $J = 310.2$  Hz), 114.1, 112.7, 100.7, 95.1, 56.0.

$^{19}\text{F}$  NMR (470 MHz,  $\text{CDCl}_3$ )  $\delta$  -44.6.

MS (EI)  $m/z$ : 247 ( $\text{M}^+$ ).

Anal. Calcd for  $\text{C}_{10}\text{H}_8\text{F}_3\text{NOS}$ : C, 48.58; H, 3.26. Found: C, 48.83; H, 3.37.

Analytical data are in accordance with the literature values.<sup>7</sup>

### 5-Bromo-3-((trifluoromethyl)thio)-1H-indole (3i).

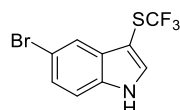

Chemical Formula:  $\text{C}_9\text{H}_5\text{BrF}_3\text{NS}$

Exact Mass: 294.9278

Elemental Analysis: C, 36.51; H, 1.70; Br, 26.99; F, 19.25; N, 4.73; S, 10.83

$^1\text{H}$  NMR (500 MHz,  $\text{CDCl}_3$ )  $\delta$  8.59 (br, 1H), 7.99 – 7.89 (m, 1H), 7.54 (d,  $J = 2.8$  Hz, 1H), 7.38 (dd,  $J = 8.7, 1.9$  Hz, 1H), 7.29 (d,  $J = 8.6$  Hz, 1H).

$^{13}\text{C}$  NMR (126 MHz,  $\text{CDCl}_3$ )  $\delta$  134.8, 133.9, 131.3, 129.3 (q,  $J = 310.2$  Hz), 126.7, 122.2, 115.4, 113.3, 95.6.

$^{19}\text{F}$  NMR (470 MHz,  $\text{CDCl}_3$ )  $\delta$  -44.5.

MS (EI)  $m/z$ : 295 ( $\text{M}^+$ ).

Anal. Calcd for  $\text{C}_9\text{H}_5\text{BrF}_3\text{NS}$ : C, 36.51; H, 1.70. Found: C, 36.20; H, 1.76.

Analytical data are in accordance with the literature values.<sup>7</sup>

### 5-Iodo-3-((trifluoromethyl)thio)-1H-indole (3j).

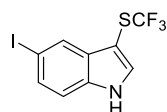

Chemical Formula:  $\text{C}_9\text{H}_5\text{F}_3\text{INS}$

Exact Mass: 342.9139

Elemental Analysis: C, 31.51; H, 1.47; F, 16.61; I, 36.99; N, 4.08; S, 9.34

$^1\text{H}$  NMR (500 MHz,  $\text{CDCl}_3$ )  $\delta$  8.59 (br, 1H), 8.13 (s, 1H), 7.55 (dd,  $J = 8.5, 1.4$  Hz, 1H), 7.52 – 7.47 (m, 1H), 7.23 – 7.17 (m, 1H).

$^{13}\text{C}$  NMR (126 MHz,  $\text{CDCl}_3$ )  $\delta$  135.3, 133.5, 132.1, 132.0, 129.3 (q,  $J = 309.5$  Hz), 128.4, 113.7,

95.2, 85.6.

$^{19}\text{F}$  NMR (470 MHz,  $\text{CDCl}_3$ )  $\delta$  -44.4.

MS (EI)  $m/z$ : 343 ( $\text{M}^+$ ).

Anal. Calcd for  $\text{C}_9\text{H}_5\text{F}_3\text{NS}$ : C, 31.51; H, 1.47. Found: C, 31.87; H, 1.52.

Analytical data are in accordance with the literature values.<sup>8</sup>

### 5-Nitro-3-((trifluoromethyl)thio)-1H-indole (3k).

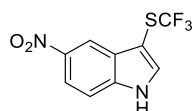

Chemical Formula:  $\text{C}_9\text{H}_5\text{F}_3\text{N}_2\text{O}_2\text{S}$

Exact Mass: 262.0024

Elemental Analysis: C, 41.23; H, 1.92; F, 21.74; N, 10.68; O, 12.20; S, 12.23

$^1\text{H}$  NMR (500 MHz,  $\text{CD}_3\text{OD}$ )  $\delta$  8.56 (d,  $J = 2.2$  Hz, 1H), 8.12 (dd,  $J = 9.0, 2.2$  Hz, 1H), 7.90 (s, 1H), 7.59 (d,  $J = 9.0$  Hz, 1H).

$^{13}\text{C}$  NMR (125 MHz,  $\text{CD}_3\text{OD}$ )  $\delta$  142.9, 139.9, 137.6, 129.4 (q,  $J = 309.4$  Hz), 129.0, 117.8, 115.0, 112.5, 95.9.

$^{19}\text{F}$  NMR (470 MHz,  $\text{CD}_3\text{OD}$ )  $\delta$  -46.6.

MS (EI)  $m/z$ : 262 ( $\text{M}^+$ ).

Anal. Calcd for  $\text{C}_9\text{H}_5\text{F}_3\text{N}_2\text{O}_2\text{S}$ : C, 41.23; H, 1.92. Found: C, 41.12; H, 1.97.

Analytical data are in accordance with the literature values.<sup>8</sup>

### 6-Fluoro-3-((trifluoromethyl)thio)-1H-indole (3l).

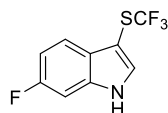

Chemical Formula:  $\text{C}_9\text{H}_5\text{F}_4\text{NS}$

Exact Mass: 235.0079

Elemental Analysis: C, 45.96; H, 2.14; F, 32.31; N, 5.96; S, 13.63

$^1\text{H}$  NMR (500 MHz,  $\text{CDCl}_3$ )  $\delta$  8.54 (br, 1H), 7.72 (dd,  $J = 8.8, 5.2$  Hz, 1H), 7.52 (d,  $J = 2.7$  Hz, 1H), 7.11 (dd,  $J = 9.2, 2.3$  Hz, 1H), 7.05 (ddd,  $J = 9.5, 8.8, 2.2$  Hz, 1H).

$^{13}\text{C}$  NMR (125 MHz,  $\text{CDCl}_3$ )  $\delta$  160.7 (d,  $J = 239.8$  Hz), 136.1 (d,  $J = 12.3$  Hz), 133.2, 129.5 (q,  $J = 309.8$  Hz), 126.0, 120.5 (d,  $J = 10.2$  Hz), 110.7 (d,  $J = 24.9$  Hz), 98.2 (d,  $J = 26.8$  Hz), 96.1.

$^{19}\text{F}$  NMR (470 MHz,  $\text{CDCl}_3$ )  $\delta$  -44.5, -119.1.

MS (EI)  $m/z$ : 235 ( $\text{M}^+$ ).

Anal. Calcd for  $\text{C}_9\text{H}_5\text{F}_4\text{NS}$ : C, 45.96; H, 2.14. Found: C, 45.61; H, 2.10.

Analytical data are in accordance with the literature values.<sup>8</sup>

### 7-Methyl-3-((trifluoromethyl)thio)-1H-indole (3m).

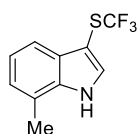

Chemical Formula:  $\text{C}_{10}\text{H}_8\text{F}_3\text{NS}$

Exact Mass: 231.0330

Elemental Analysis: C, 51.94; H, 3.49; F, 24.65; N, 6.06; S, 13.86

$^1\text{H}$  NMR (500 MHz,  $\text{CDCl}_3$ )  $\delta$  8.44 (br, 1H), 7.69 (d,  $J = 8.0$  Hz, 1H), 7.52 (t,  $J = 2.2$  Hz, 1H), 7.23 (t,  $J = 7.6$  Hz, 1H), 7.12 (d,  $J = 7.1$  Hz, 1H), 2.51 (s, 3H).

$^{13}\text{C}$  NMR (125 MHz,  $\text{CDCl}_3$ )  $\delta$  135.8, 132.6, 129.6 (q,  $J = 309.7$  Hz), 129.2, 124.1, 121.9, 121.0,



117.2, 96.1, 16.4.

$^{19}\text{F}$  NMR (470 MHz,  $\text{CDCl}_3$ )  $\delta$  -44.5.

MS (EI)  $m/z$ : 231 ( $\text{M}^+$ ).

Anal. Calcd for  $\text{C}_{10}\text{H}_8\text{F}_3\text{NS}$ : C, 51.94; H, 3.49. Found: C, 52.24; H, 3.59.

Analytical data are in accordance with the literature values.<sup>7</sup>

### Methyl 3-((trifluoromethyl)thio)-1H-indole-7-carboxylate (3n).

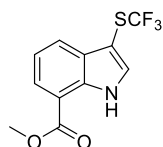

Chemical Formula:  $\text{C}_{11}\text{H}_8\text{F}_3\text{NO}_2\text{S}$

Exact Mass: 275.0228

Elemental Analysis: C, 48.00; H, 2.93; F, 20.71; N, 5.09; O, 11.63; S, 11.65

$^1\text{H}$  NMR (500 MHz,  $\text{CD}_3\text{OD}$ )  $\delta$  7.88 (q,  $J = 7.2$  Hz, 2H), 7.71 (s, 1H), 7.23 (t,  $J = 7.5$  Hz, 1H), 3.96 (s, 3H).

$^{13}\text{C}$  NMR (125 MHz,  $\text{CD}_3\text{OD}$ )  $\delta$  166.9, 135.4, 135.1, 130.8, 129.6 (q,  $J = 309.1$  Hz), 125.3, 124.0, 120.3, 113.8, 94.0, 51.2.

$^{19}\text{F}$  NMR (470 MHz,  $\text{CD}_3\text{OD}$ )  $\delta$  -46.7.

MS (EI)  $m/z$ : 275 ( $\text{M}^+$ ).

Anal. Calcd for  $\text{C}_{11}\text{H}_8\text{F}_3\text{NO}_2\text{S}$ : C, 48.00; H, 2.93. Found: C, 47.93; H, 3.05.

Analytical data are in accordance with the literature values.<sup>8</sup>

### 2-Phenyl-5-((trifluoromethyl)thio)-1H-pyrrole (6a).

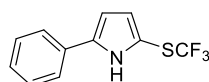

Chemical Formula:  $\text{C}_{11}\text{H}_8\text{F}_3\text{NS}$

Exact Mass: 243.0330

Elemental Analysis: C, 54.32; H, 3.32; F, 23.43; N, 5.76; S, 13.18

$^1\text{H}$  NMR (500 MHz,  $\text{CDCl}_3$ )  $\delta$  8.59 (br, 1H), 7.55 – 7.49 (m, 2H), 7.43 (dd,  $J = 8.6, 7.0$  Hz, 2H), 7.35 – 7.28 (m, 1H), 6.73 (dd,  $J = 3.7, 2.6$  Hz, 1H), 6.59 (dd,  $J = 3.6, 2.8$  Hz, 1H).

$^{13}\text{C}$  NMR (125 MHz,  $\text{CDCl}_3$ )  $\delta$  136.9, 130.4, 128.1, 127.4 (q,  $J = 311.3$  Hz), 126.7, 123.5, 122.1, 107.3.

$^{19}\text{F}$  NMR (470 MHz,  $\text{CDCl}_3$ )  $\delta$  -45.0.

MS (EI)  $m/z$ : 243 ( $\text{M}^+$ ).

Anal. Calcd for  $\text{C}_{11}\text{H}_8\text{F}_3\text{NS}$ : C, 54.32; H, 3.32. Found: C, 54.09; H, 3.27.

Analytical data are in accordance with the literature values.<sup>7</sup>

### 1-(4-Methoxyphenyl)-2-((trifluoromethyl)thio)-1H-pyrrole (6b).

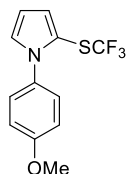

Chemical Formula:  $\text{C}_{12}\text{H}_{10}\text{F}_3\text{NOS}$

Exact Mass: 273.0435

Elemental Analysis: C, 52.74; H, 3.69; F, 20.86; N, 5.13; O, 5.85; S, 11.73

$^1\text{H}$  NMR (500 MHz,  $\text{CDCl}_3$ )  $\delta$  7.25 – 7.20 (m, 2H), 7.08 (t,  $J = 2.4$  Hz, 1H), 6.99 – 6.95 (m, 2H),

6.82 (dd,  $J = 3.8, 1.8$  Hz, 1H), 6.35 (t,  $J = 3.3$  Hz, 1H), 3.87 (s, 3H).

$^{13}\text{C}$  NMR (125 MHz,  $\text{CDCl}_3$ )  $\delta$  159.4, 132.0, 129.1, 128.4, 128.3 (q,  $J = 311.3$  Hz), 123.6, 114.1, 111.1, 109.9, 55.6.

$^{19}\text{F}$  NMR (470 MHz,  $\text{CDCl}_3$ )  $\delta$  -45.3.

MS (EI)  $m/z$ : 273 ( $\text{M}^+$ ).

Anal. Calcd for  $\text{C}_{12}\text{H}_{10}\text{F}_3\text{NOS}$ : C, 52.74; H, 3.69. Found: C, 52.45; H, 3.77.

Analytical data are in accordance with the literature values.<sup>8</sup>

### 2,5-Dimethyl-3-((trifluoromethyl)thio)-1H-pyrrole (6c).

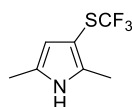

Chemical Formula:  $\text{C}_7\text{H}_9\text{F}_3\text{NS}$   
Exact Mass: 195.0330  
Elemental Analysis: C, 43.07; H, 4.13; F, 29.20; N, 7.18; S, 16.42

$^1\text{H}$  NMR (500 MHz,  $\text{CDCl}_3$ )  $\delta$  7.92 (br, 1H), 5.96 (s, 1H), 2.31 (s, 3H), 2.22 (s, 3H).

$^{19}\text{F}$  NMR (470 MHz,  $\text{CDCl}_3$ )  $\delta$  -46.3.

MS (EI)  $m/z$ : 195 ( $\text{M}^+$ ).

Analytical data are in accordance with the literature values.<sup>9</sup>

### Methyl (E)-3-(benzylamino)-2-((trifluoromethyl)thio)but-2-enoate (7a).

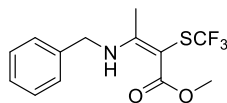

Chemical Formula:  $\text{C}_{13}\text{H}_{14}\text{F}_3\text{NO}_2\text{S}$   
Exact Mass: 305.0697  
Elemental Analysis: C, 51.14; H, 4.62; F, 18.67; N, 4.59; O, 10.48; S, 10.50

$^1\text{H}$  NMR (500 MHz,  $\text{CDCl}_3$ )  $\delta$  10.77 (br, 1H), 7.38 (t,  $J = 7.4$  Hz, 2H), 7.31 (t,  $J = 7.3$  Hz, 1H), 7.26 (d,  $J = 7.4$  Hz, 2H), 4.53 (d,  $J = 5.9$  Hz, 2H), 3.74 (s, 3H), 2.41 (s, 3H).

$^{13}\text{C}$  NMR (125 MHz,  $\text{CDCl}_3$ )  $\delta$  171.7, 171.4, 137.0, 130.1 (q,  $J = 311.8$  Hz), 129.2, 128.1, 127.0, 76.3, 51.7, 48.5, 17.9.

$^{19}\text{F}$  NMR (470 MHz,  $\text{CDCl}_3$ )  $\delta$  -47.3.

MS (EI)  $m/z$ : 305 ( $\text{M}^+$ ).

Anal. Calcd for  $\text{C}_{13}\text{H}_{14}\text{F}_3\text{NO}_2\text{S}$ : C, 51.14; H, 4.62. Found: C, 51.41; H, 4.54.

Analytical data are in accordance with the literature values.<sup>10</sup>

### (E)-4-(benzylamino)-3-((trifluoromethyl)thio)pent-3-en-2-one (7b).

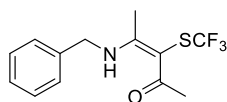

Chemical Formula:  $\text{C}_{13}\text{H}_{14}\text{F}_3\text{NOS}$   
Exact Mass: 289.0748  
Elemental Analysis: C, 53.97; H, 4.88; F, 19.70; N, 4.84; O, 5.53; S, 11.08

$^1\text{H}$  NMR (500 MHz,  $\text{CDCl}_3$ )  $\delta$  12.91 (br, 1H), 7.38 – 7.24 (m, 5H), 4.54 (d,  $J = 5.9$  Hz, 2H), 2.44 (s, 3H), 2.38 (s, 3H).

$^{13}\text{C}$  NMR (125 MHz,  $\text{CDCl}_3$ )  $\delta$  199.9, 172.4, 136.4, 130.1 (q,  $J = 311.5$  Hz), 129.2, 128.1, 127.0, 88.7, 48.5, 29.2, 17.9.

$^{19}\text{F}$  NMR (470 MHz,  $\text{CDCl}_3$ )  $\delta$  -47.2.

MS (EI)  $m/z$ : 289 ( $\text{M}^+$ ).

Anal. Calcd for C<sub>13</sub>H<sub>14</sub>F<sub>3</sub>NOS: C, 53.97; H, 4.88. Found: C, 54.06; H, 4.96.

Analytical data are in accordance with the literature values.<sup>10</sup>

**(E)-3-(Benzylamino)-1-phenyl-2-((trifluoromethyl)thio)but-2-en-1-one (7c).**

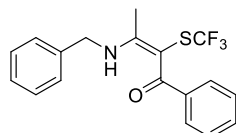

Chemical Formula: C<sub>18</sub>H<sub>16</sub>F<sub>3</sub>NOS

Exact Mass: 351.0905

Elemental Analysis: C, 61.53; H, 4.59; F, 16.22; N, 3.99; O, 4.55; S, 9.12

<sup>1</sup>H NMR (500 MHz, CDCl<sub>3</sub>) δ 13.04 (br, 1H), 7.49 – 7.29 (m, 10H), 4.63 (t, *J* = 4.8 Hz, 2H), 2.51 (s, 3H).

<sup>13</sup>C NMR (125 MHz, CDCl<sub>3</sub>) δ 197.9, 174.0, 142.3, 136.1, 129.8 (q, *J* = 311.6 Hz), 129.3, 129.2, 128.2, 127.7, 127.6, 127.2, 88.0, 48.8, 18.4.

<sup>19</sup>F NMR (470 MHz, CDCl<sub>3</sub>) δ -47.5.

MS (EI) *m/z*: 351 (M<sup>+</sup>).

Anal. Calcd for C<sub>18</sub>H<sub>16</sub>F<sub>3</sub>NOS: C, 61.53; H, 4.59. Found: C, 61.90; H, 4.73.

Analytical data are in accordance with the literature values.<sup>10</sup>

**Methyl (E)-3-(phenylamino)-2-((trifluoromethyl)thio)but-2-enoate (7d).**

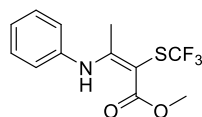

Chemical Formula: C<sub>12</sub>H<sub>12</sub>F<sub>3</sub>NO<sub>2</sub>S

Exact Mass: 291.0541

Elemental Analysis: C, 49.48; H, 4.15; F, 19.57; N, 4.81; O, 10.98; S, 11.01

<sup>1</sup>H NMR (500 MHz, CDCl<sub>3</sub>) δ 11.99 (br, 1H), 7.39 (t, *J* = 7.8 Hz, 2H), 7.29 (t, *J* = 7.4 Hz, 1H), 7.13 (d, *J* = 7.7 Hz, 2H), 3.79 (s, 3H), 2.35 (s, 3H).

<sup>13</sup>C NMR (125 MHz, CDCl<sub>3</sub>) δ 171.2, 170.1, 138.3, 130.1 (q, *J* = 312.0 Hz), 129.5, 127.1, 126.0, 78.5, 51.9, 19.4.

<sup>19</sup>F NMR (470 MHz, CDCl<sub>3</sub>) δ -46.6.

MS (EI) *m/z*: 291 (M<sup>+</sup>).

Anal. Calcd for C<sub>12</sub>H<sub>12</sub>F<sub>3</sub>NO<sub>2</sub>S: C, 49.48; H, 4.15. Found: C, 49.16; H, 4.01.

Analytical data are in accordance with the literature values.<sup>10</sup>

**Ethyl (E)-3-(benzylamino)-3-phenyl-2-((trifluoromethyl)thio)acrylate (7e).**

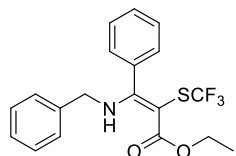

Chemical Formula: C<sub>19</sub>H<sub>18</sub>F<sub>3</sub>NO<sub>2</sub>S

Exact Mass: 381.1010

Elemental Analysis: C, 59.83; H, 4.76; F, 14.94; N, 3.67; O, 8.39; S, 8.41

<sup>1</sup>H NMR (500 MHz, CDCl<sub>3</sub>) δ 10.62 (br, 1H), 7.42 (dd, *J* = 4.9, 1.7 Hz, 3H), 7.35 – 7.24 (m, 3H), 7.12 (dd, *J* = 17.0, 5.5 Hz, 4H), 4.26 (q, *J* = 7.1 Hz, 2H), 4.13 (d, *J* = 6.1 Hz, 2H), 1.33 (t, *J* = 7.1 Hz, 3H).

<sup>13</sup>C NMR (125 MHz, CDCl<sub>3</sub>) δ 173.1, 171.0, 137.6, 134.2, 129.6 (q, *J* = 311.2 Hz), 129.3, 128.9, 128.5, 127.8, 127.2, 78.2, 60.6, 49.7, 14.5.

$^{19}\text{F}$  NMR (470 MHz,  $\text{CDCl}_3$ )  $\delta$  -46.6.

MS (EI)  $m/z$ : 381 ( $\text{M}^+$ ).

Anal. Calcd for  $\text{C}_{19}\text{H}_{18}\text{F}_3\text{NO}_2\text{S}$ : C, 59.83; H, 4.76. Found: C, 59.48; H, 4.87.

Analytical data are in accordance with the literature values.<sup>10</sup>

#### 4. Experiments for the Mechanistic Study

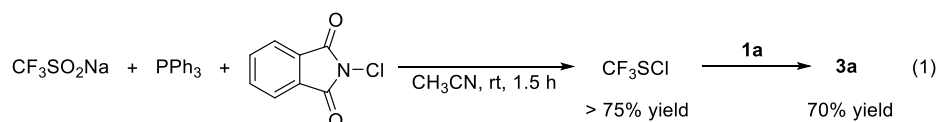

A 10-mL Schlenk tube with a magnetic stirring bar was charged with triphenylphosphine (0.6 mmol, 158 mg), chlorophthalimide (0.3 mmol, 55 mg) and sodium trifluoromethanesulfinate (0.3 mmol, 47 mg). The tube was evacuated and backfilled with dry nitrogen (this operation was repeated three times). Dry acetonitrile (2 mL) was added by syringe. The resulting mixture was stirred at room temperature and monitored by  $^{19}\text{F}$  and  $^{31}\text{P}$  NMR spectroscopies with  $\text{PhCF}_3$  as the internal standard. As can be seen from Figure S1 and S2, triphenylphosphine converted completely into triphenylphosphine oxide after 1.5 hours, and  $\text{CF}_3\text{SCl}$  was afforded in 75% yield determined by  $^{19}\text{F}$  NMR. Considering the volatility of  $\text{CF}_3\text{SCl}$ , the yield should be greater than 75%. Indole (**1a**, 0.2 mmol) was added to this mixture under nitrogen, and then the mixture was stirred for 14 hours. Trifluoromethylthiolated product **3a** was afforded in 70% based on **1a** after the reaction.

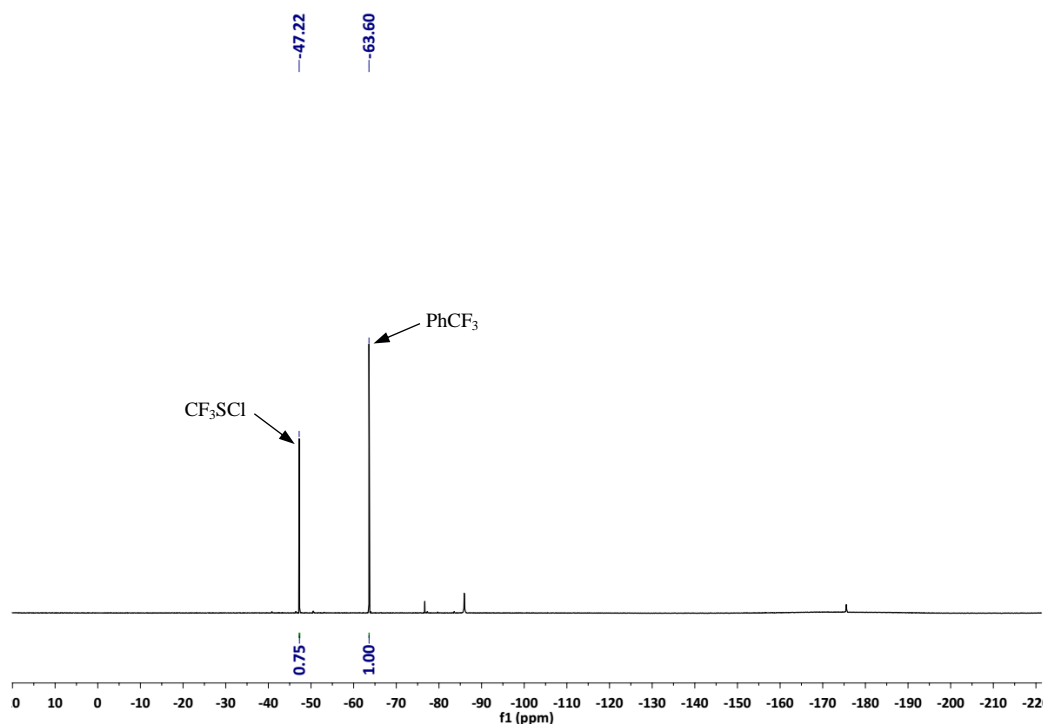

**Figure S1.**  $^{19}\text{F}$  NMR spectrum of reaction mixture (after a reaction time of 1.5 h).

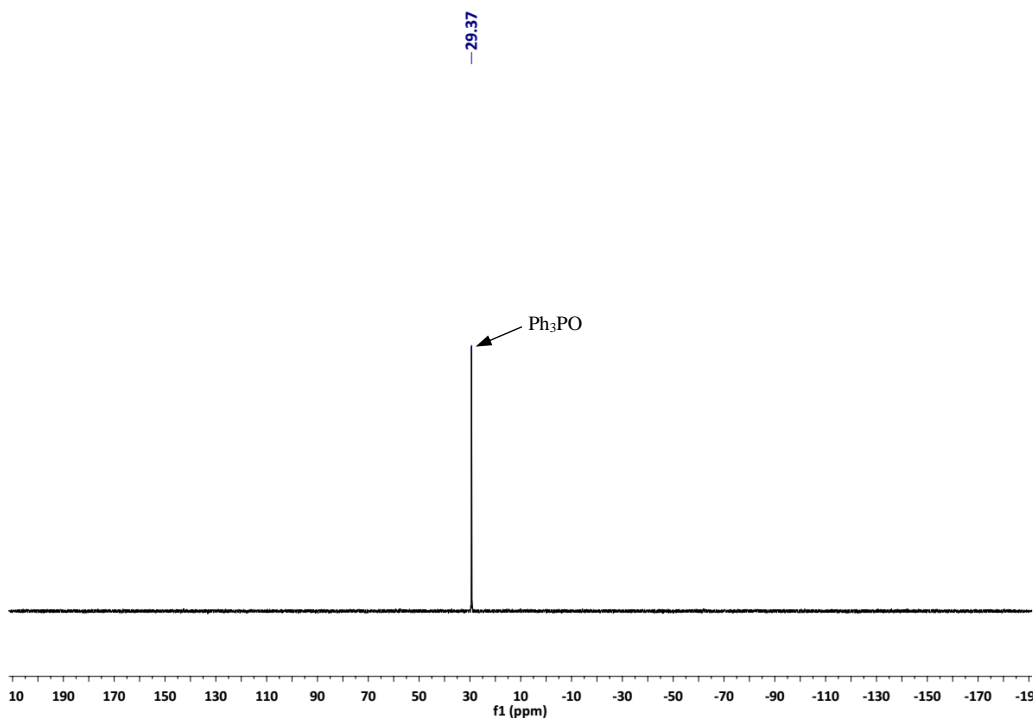

**Figure S2.** <sup>31</sup>P NMR spectrum of reaction mixture (after a reaction time of 1.5 h).

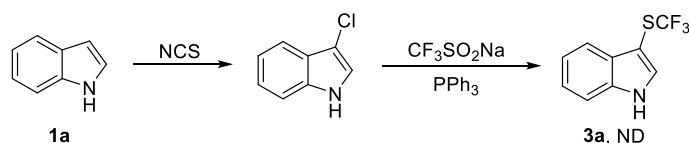

To a 100 mL round-bottom flask with indole (1.00 g, 8.54 mmol, 1.0 equiv) in DMF (35 mL) was added *N*-chlorosuccinimide (1.23 g, 8.96 mmol, 1.05 equiv) at room temperature. After 1 h, water (40 mL) was added and the aqueous layer was extracted with EtOAc (3 × 35 mL). The combined organic layers were washed with brine (50 mL), and concentrated *in vacuo*. Purification of 3-chloroindole was achieved by column chromatography.

A 10-mL Schlenk tube with a magnetic stirring bar was charged with triphenylphosphine (0.6 mmol, 158 mg), and sodium trifluoromethanesulfinate (0.3 mmol, 47 mg). The tube was evacuated and backfilled with dry nitrogen (this operation was repeated three times). 3-Chloroindole dissolved in dry acetonitrile (2 mL) was added by syringe. The reaction mixture was stirred at room temperature for 14 hours. No trifluoromethylthiolated product **3a** could be detected after the reaction.

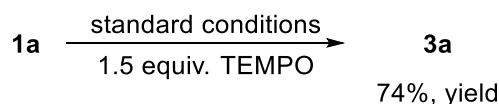

A 10-mL Schlenk tube with a magnetic stirring bar was charged with triphenylphosphine (0.6 mmol, 158 mg), chlorophthalimide (0.3 mmol, 55 mg) and sodium trifluoromethanesulfinate (0.3 mmol, 47 mg). The tube was evacuated and backfilled with dry nitrogen (this operation was repeated three times). Indole (**1a**, 0.2 mmol, 24 mg) and TEMPO (0.3 mmol, 47 mg) dissolved in dry acetonitrile

(2 mL) was added by syringe. The resulting mixture was stirred at room temperature before the solvent was removed under reduced pressure. A 74% yield of 3-((trifluoromethyl)thio)-1*H*-indole (**3a**) was achieved by column chromatography.

## 5. References

- 1 H. Huo, C. Fu, K. Harms and E. Meggers, *J. Am. Chem. Soc.*, 2014, **136**, 2990.
- 2 J. Wen, R. Y. Zhang, S. Y. Chen, J. Zhang and X. Q. Yu, *J. Org. Chem.*, 2012, **77**, 766.
- 3 Z.-L. Xu, H.-X. Li, Z.-G. Ren, W.-Y. Du, W.-C. Xu and J.-P. Lang, *Tetrahedron*, 2011, **67**, 5282.
- 4 C. A. Brandt, A. C. M. P. da Silva, C. G. Pancote, C. L. Brito and M. A. B. da Silveira, *Synthesis*, 2004, 1557.
- 5 X.-Y. Zhang, Z.-W. Yang, Z. Chen, J. Wang, D.-L. Yang, Z. Shen, L.-L. Hu, J.-W. Xie, J. Zhang and H.-L. Cui, *J. Org. Chem.*, 2016, **81**, 1778.
- 6 G. Cheng, X. Zeng, J. Shen, X. Wang and X. Cui, *Angew. Chem. Int. Ed.*, 2013, **52**, 13265.
- 7 L. Jiang, J. Qian, W. Yi, G. Lu, C. Cai and W. Zhang, *Angew. Chem. Int. Ed.*, 2015, **54**, 14965.
- 8 R. Honeker, J. B. Ernst and F. Glorius, *Chem. – Eur. J.*, 2015, **21**, 8047.
- 9 H. Chachignon, M. Maeno, H. Kondo, N. Shibata and D. Cahard, *Org. Lett.*, 2016, **18**, 2467.
- 10 Y.-D. Yang, A. Azuma, E. Tokunaga, M. Yamasaki, M. Shiro and N. Shibata, *J. Am. Chem. Soc.*, 2013, **135**, 8782.

## 6. Copies of NMR Spectra

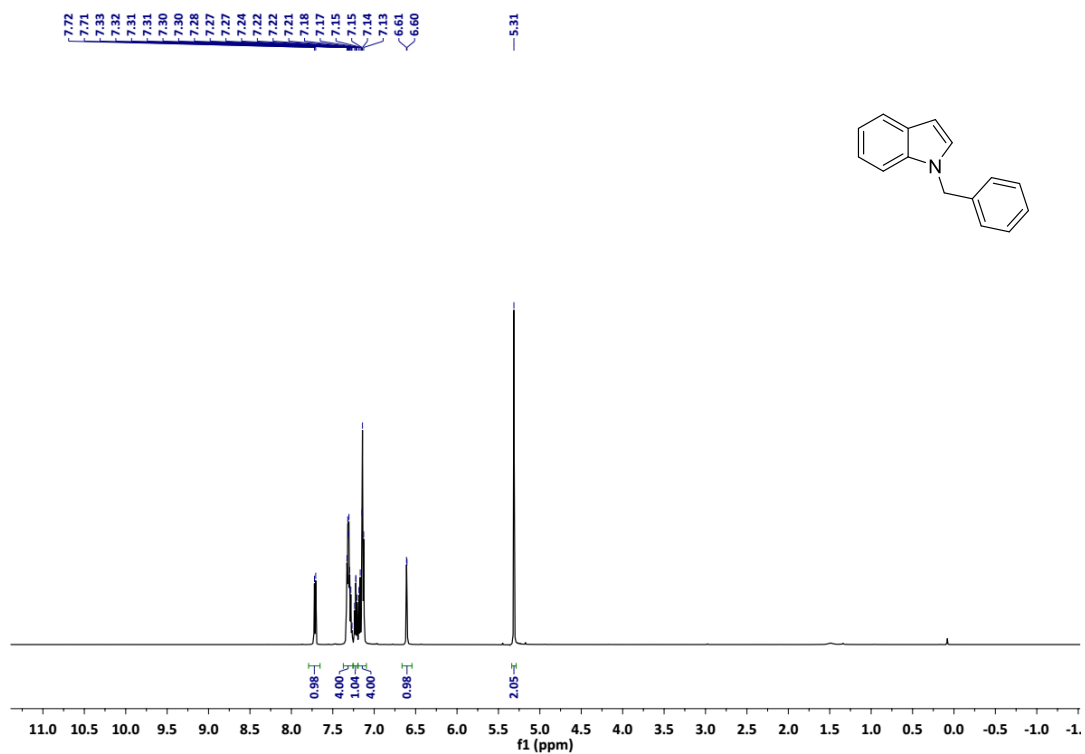

<sup>1</sup>H NMR spectrum (500 MHz, CDCl<sub>3</sub>) of **1c**

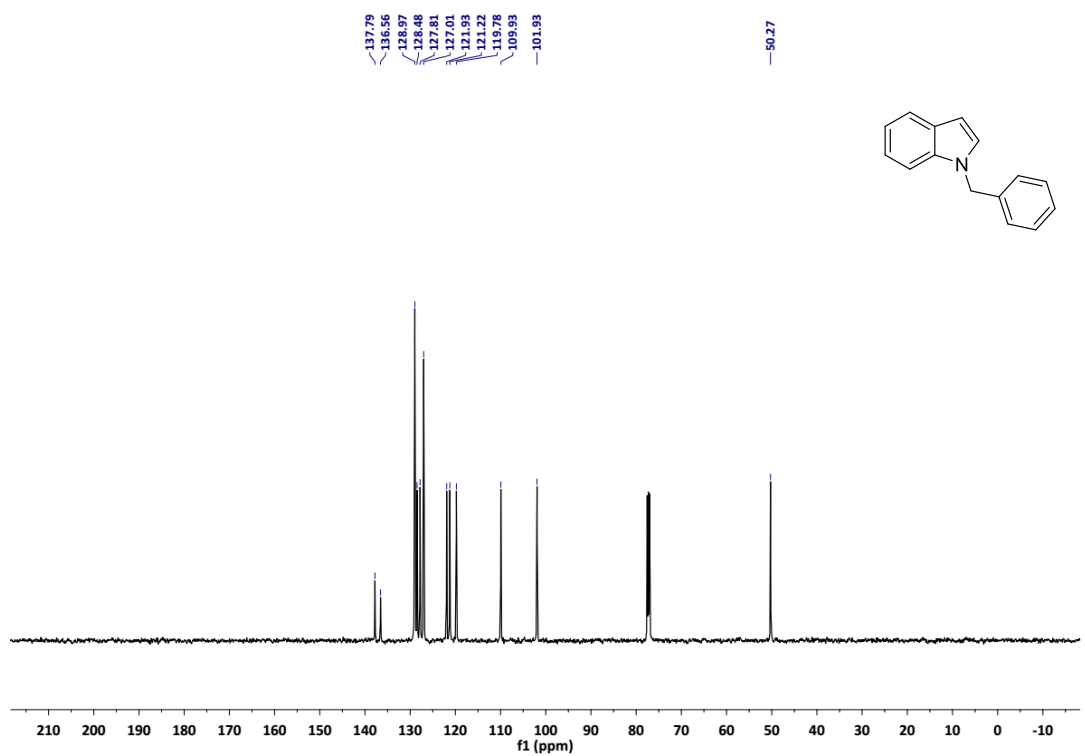

<sup>13</sup>C NMR spectrum (125 MHz, CDCl<sub>3</sub>) of **1c**

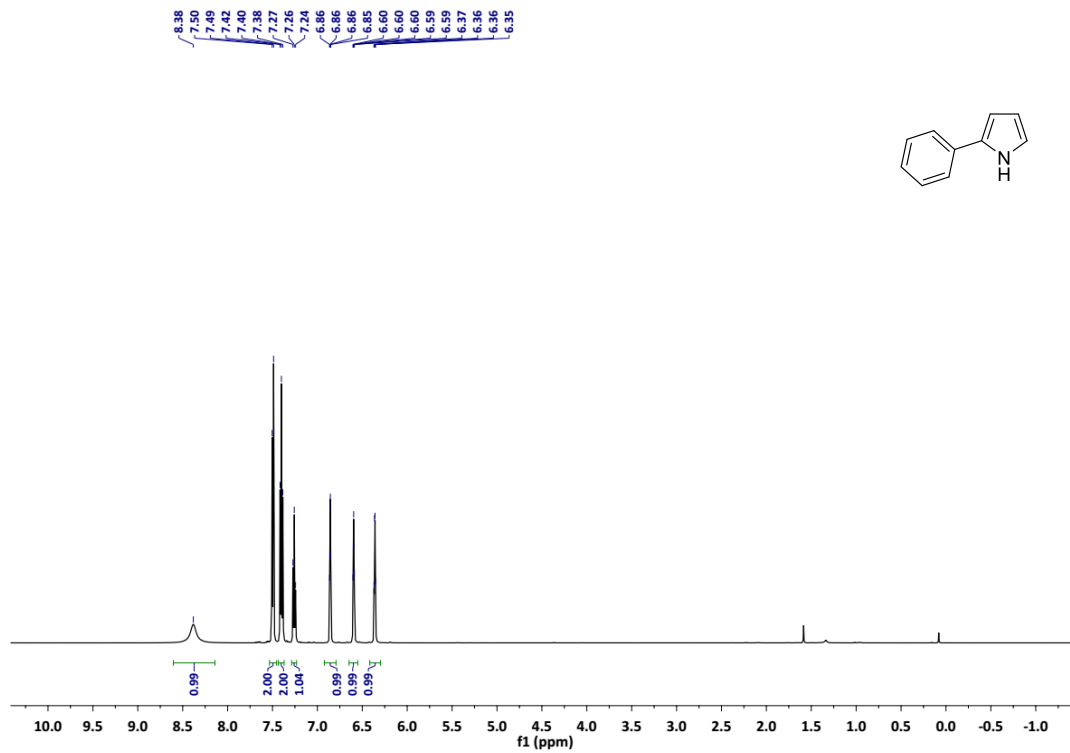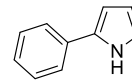

<sup>1</sup>H NMR spectrum (500 MHz, CDCl<sub>3</sub>) of **4a**

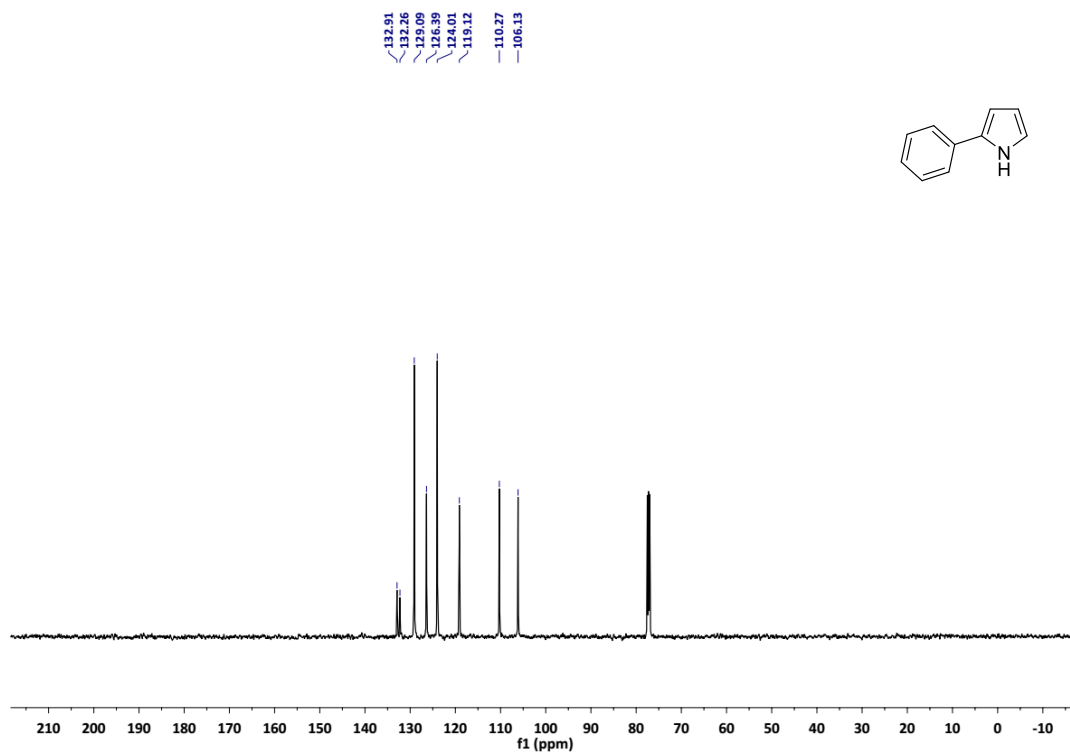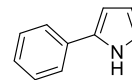

<sup>13</sup>C NMR spectrum (125 MHz, CDCl<sub>3</sub>) of **4a**



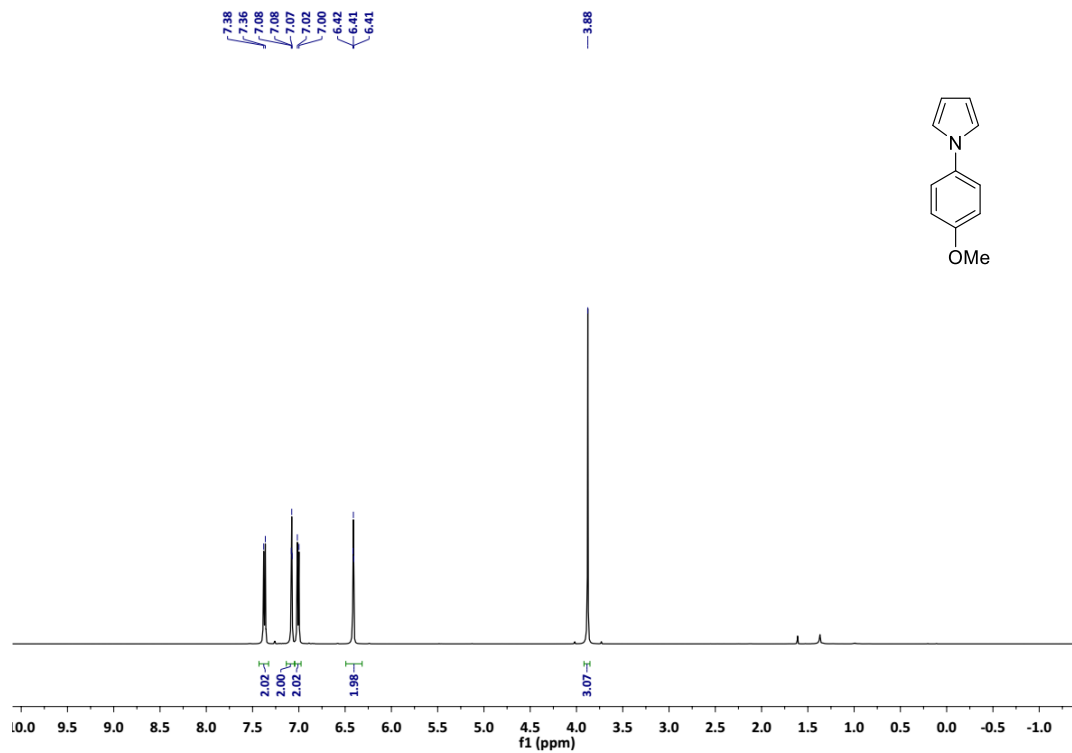

$^1\text{H}$  NMR spectrum (500 MHz,  $\text{CDCl}_3$ ) of **4b**

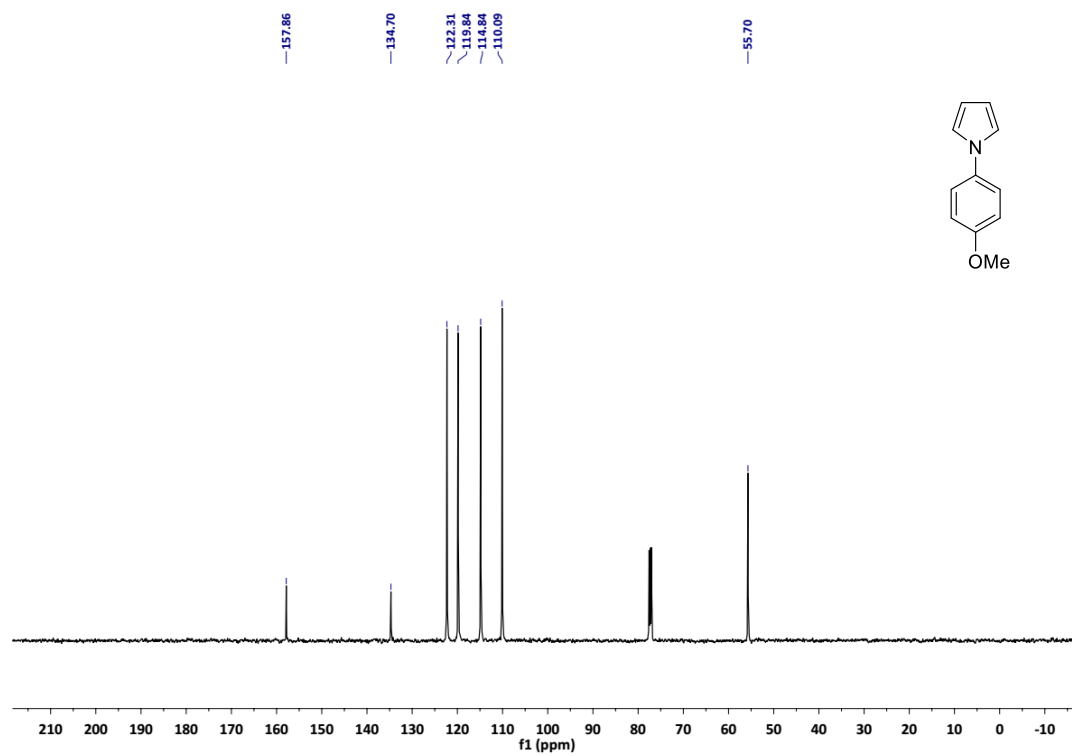

$^{13}\text{C}$  NMR spectrum (125 MHz,  $\text{CDCl}_3$ ) of **4b**

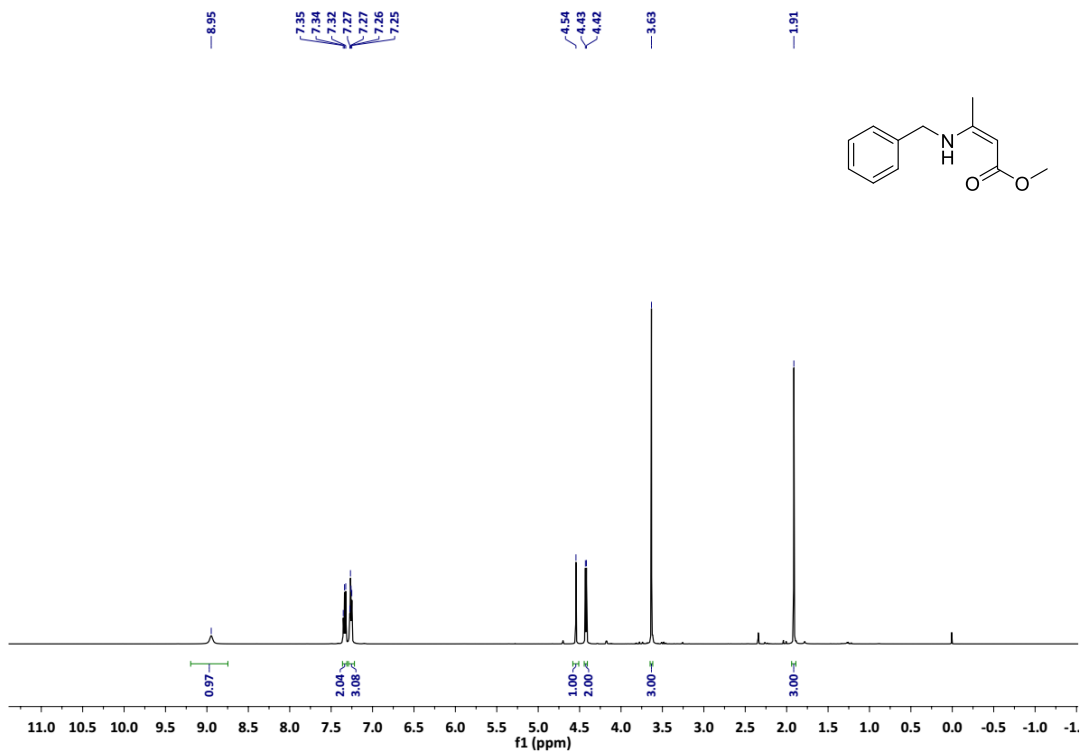

$^1\text{H}$  NMR spectrum (500 MHz,  $\text{CDCl}_3$ ) of **5a**

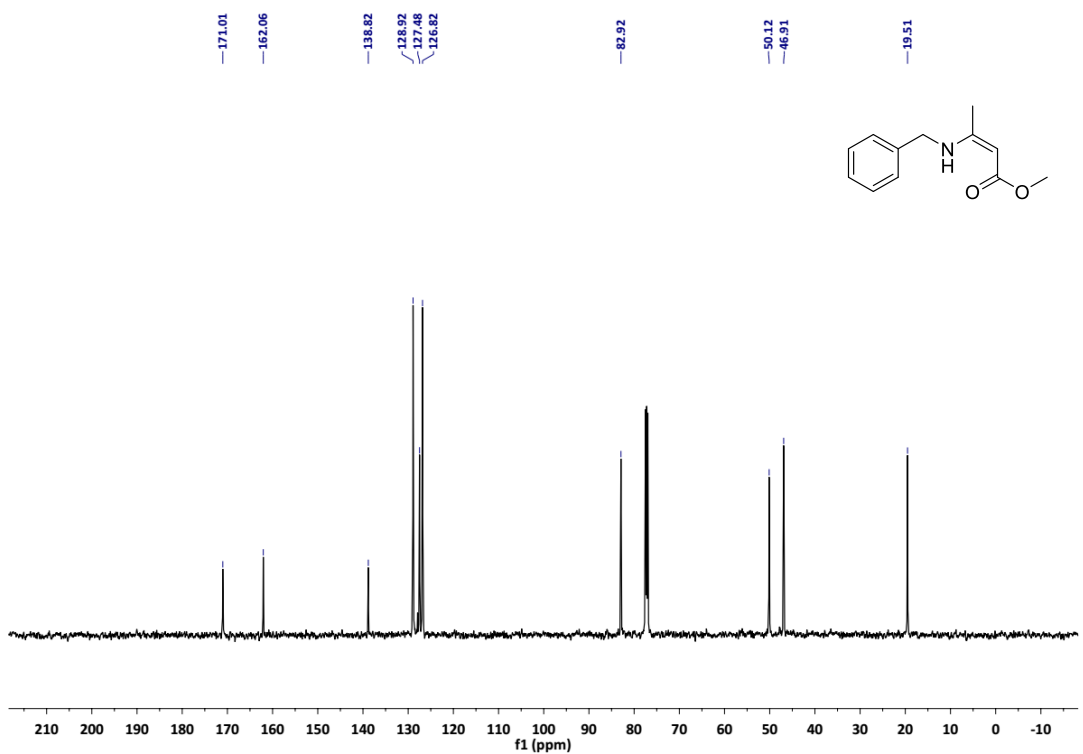

$^{13}\text{C}$  NMR spectrum (125 MHz,  $\text{CDCl}_3$ ) of **5a**

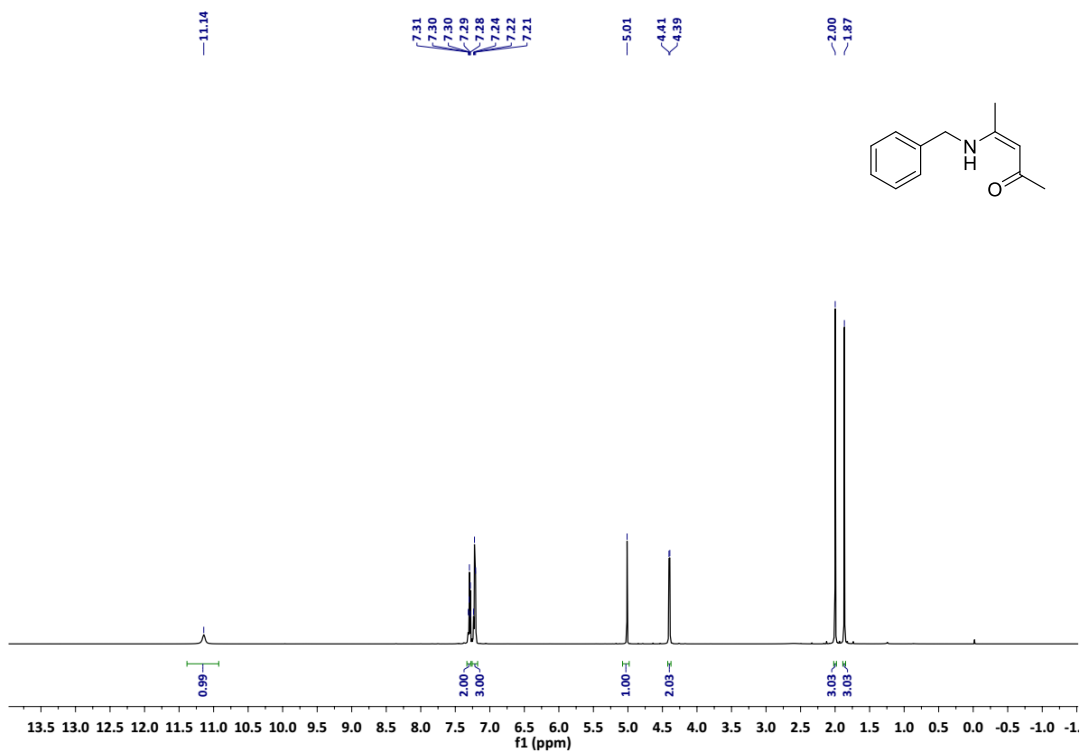

$^1\text{H}$  NMR spectrum (500 MHz,  $\text{CDCl}_3$ ) of **5b**

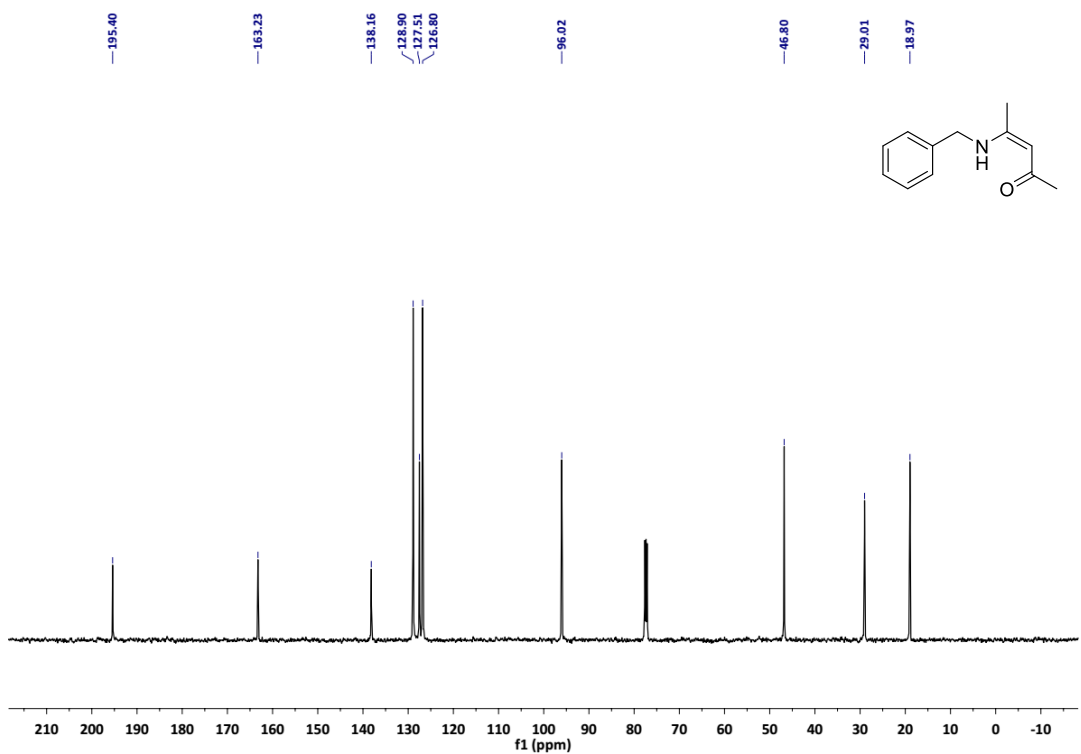

$^{13}\text{C}$  NMR spectrum (125 MHz,  $\text{CDCl}_3$ ) of **5b**

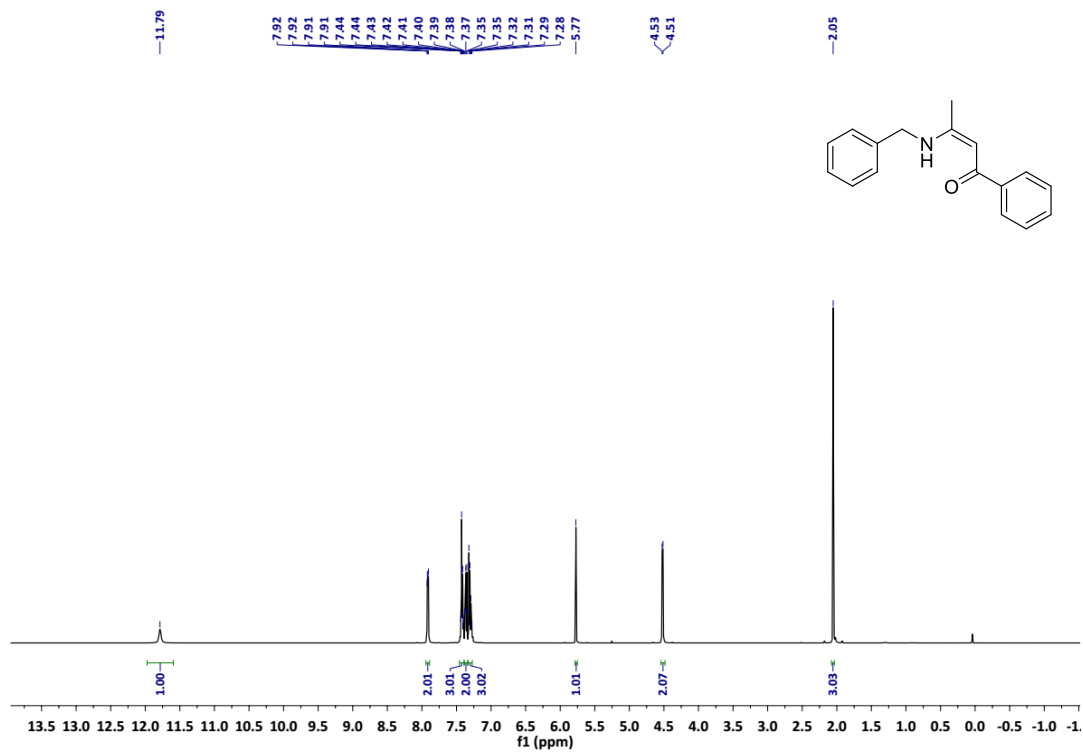

<sup>1</sup>H NMR spectrum (500 MHz, CDCl<sub>3</sub>) of **5c**

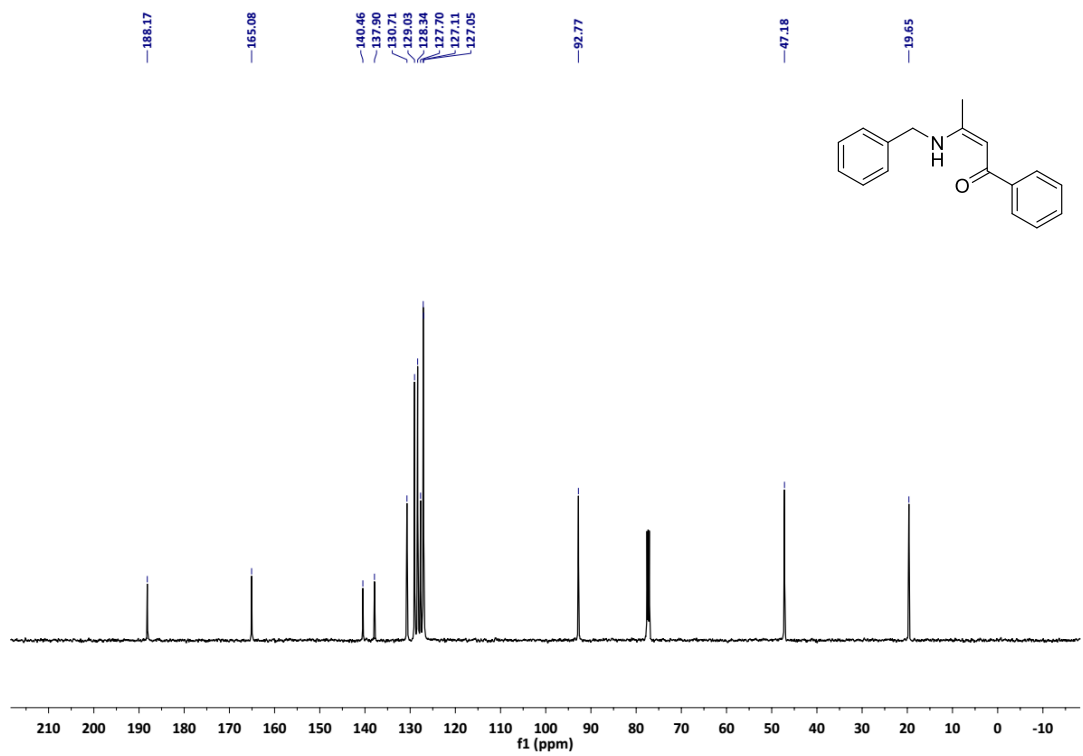

<sup>13</sup>C NMR spectrum (125 MHz, CDCl<sub>3</sub>) of **5c**

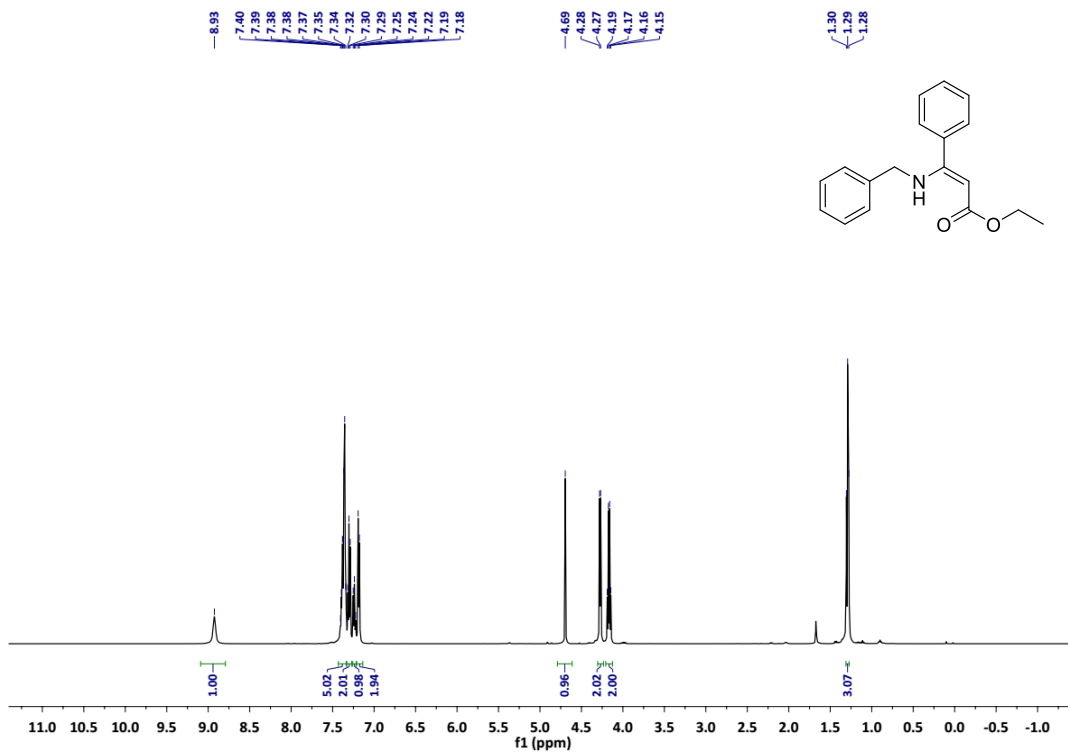

$^1\text{H}$  NMR spectrum (500 MHz,  $\text{CDCl}_3$ ) of **5e**

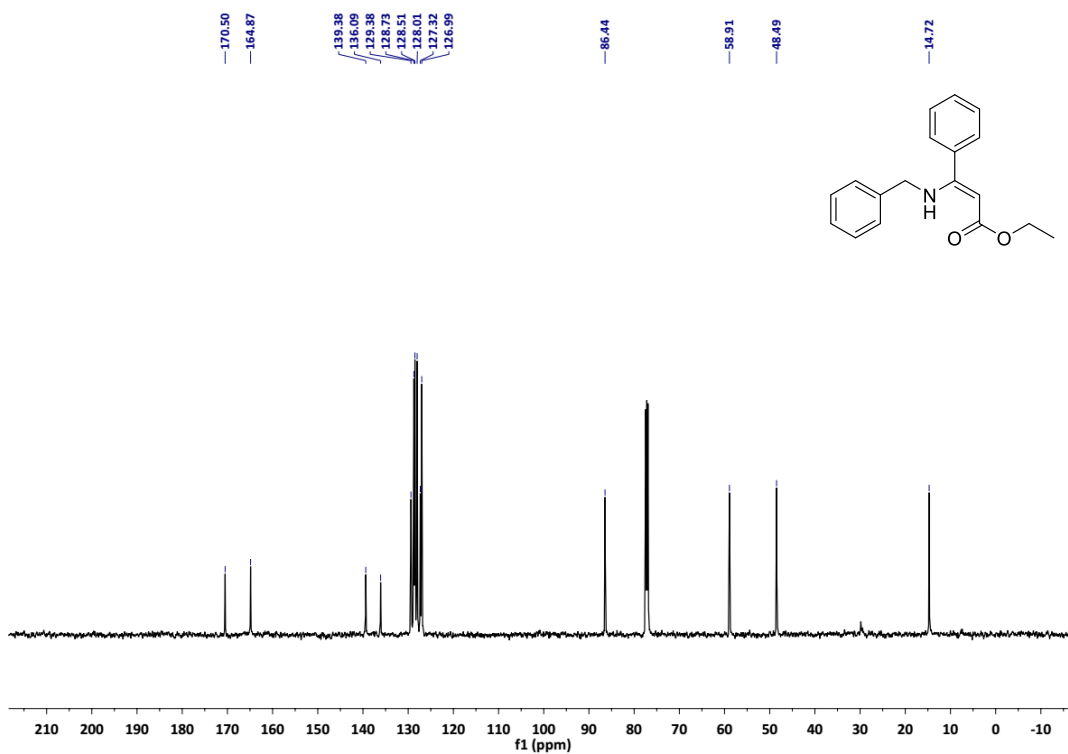

$^{13}\text{C}$  NMR spectrum (125 MHz,  $\text{CDCl}_3$ ) of **5e**

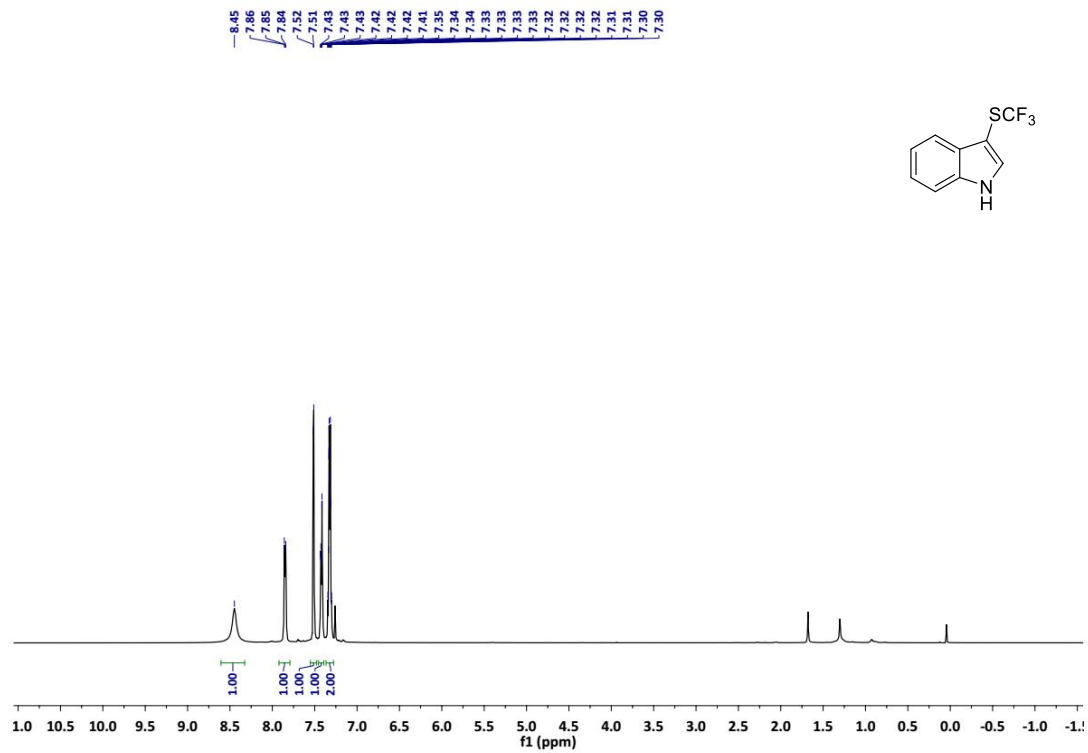

<sup>1</sup>H NMR spectrum (500 MHz, CDCl<sub>3</sub>) of **3a**

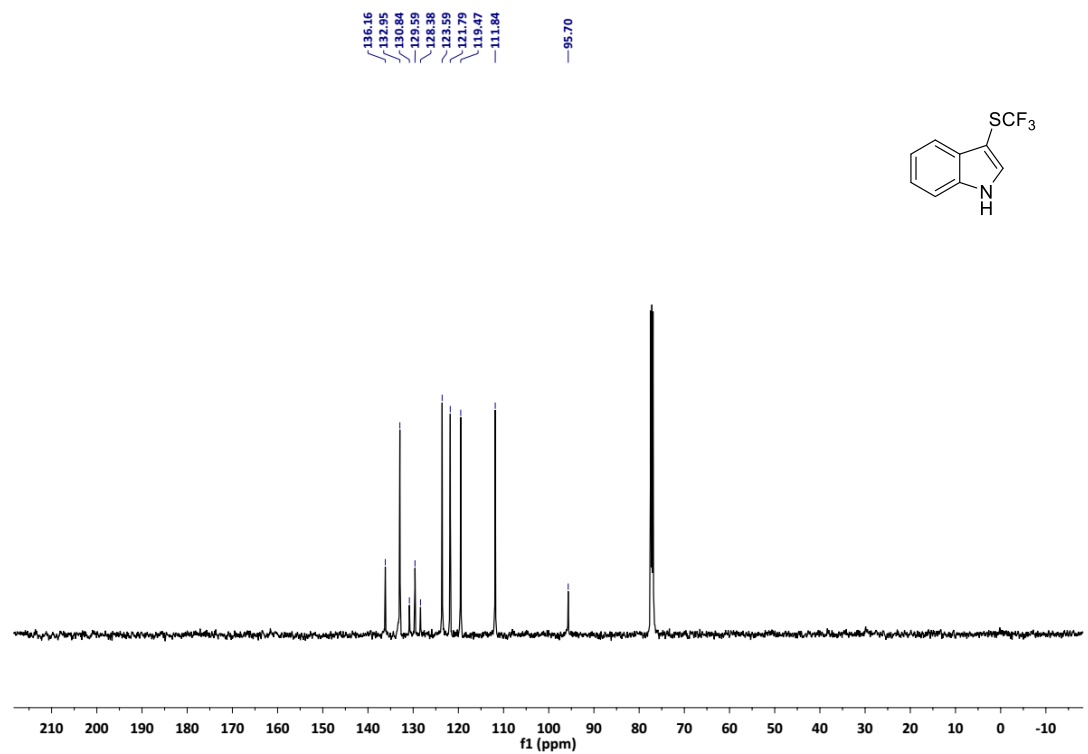

<sup>13</sup>C NMR spectrum (125 MHz, CDCl<sub>3</sub>) of **3a**

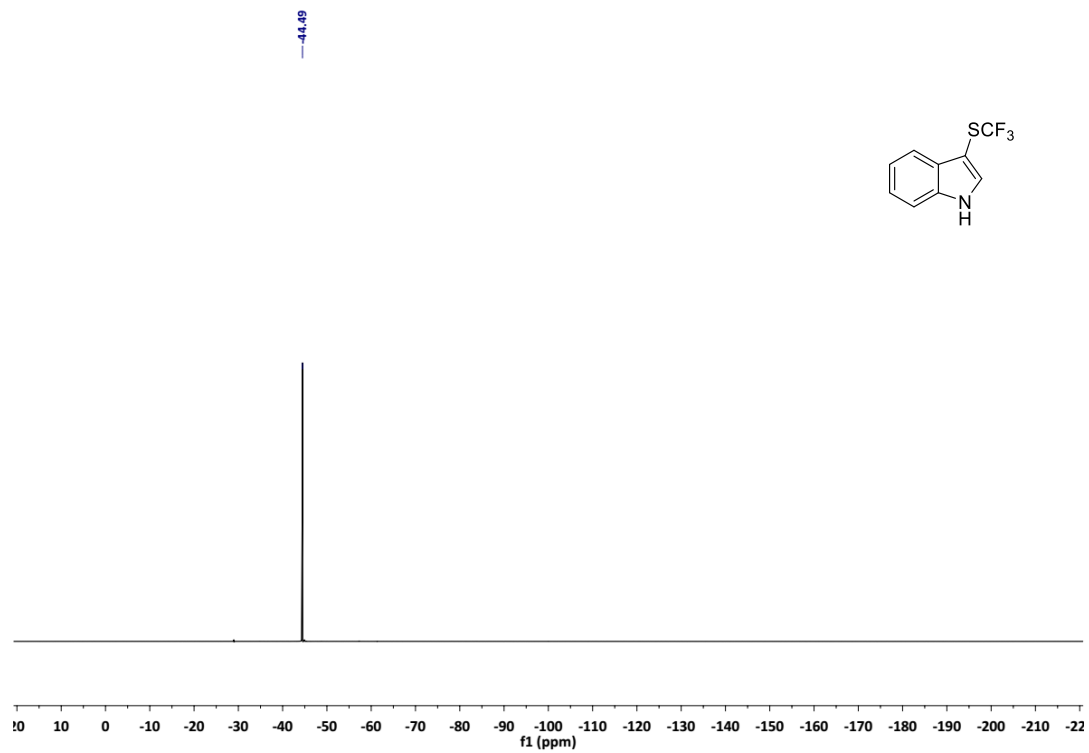

<sup>19</sup>F NMR spectrum (470 MHz, CDCl<sub>3</sub>) of **3a**

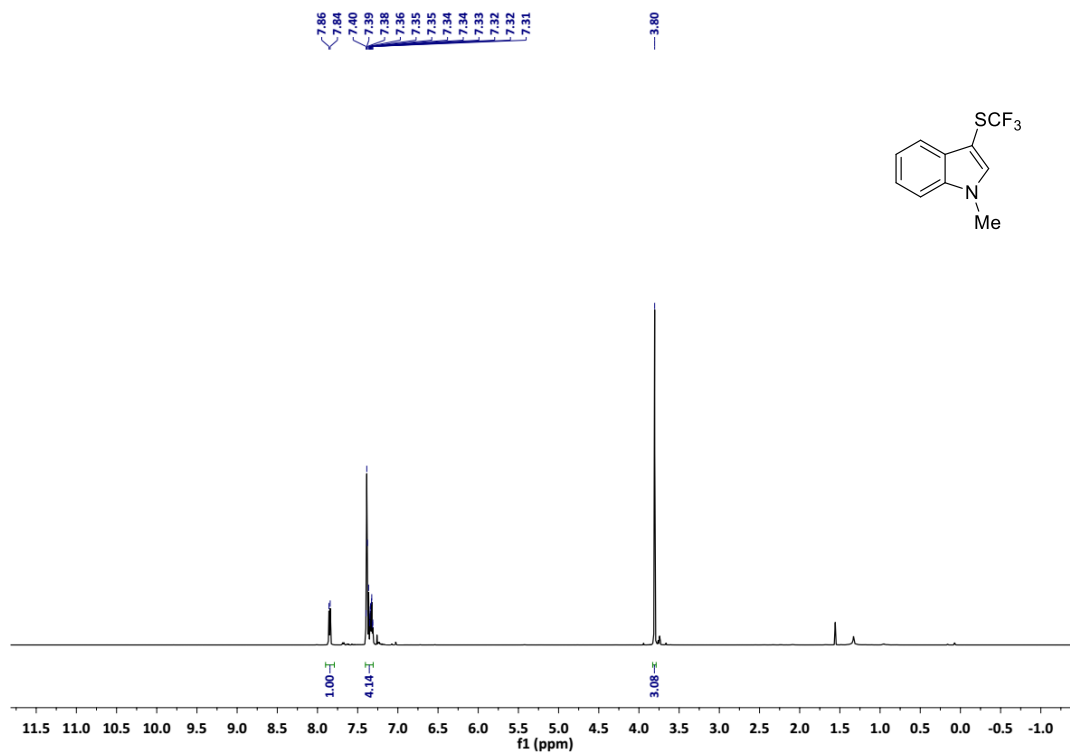

<sup>1</sup>H NMR spectrum (500 MHz, CDCl<sub>3</sub>) of **3b**

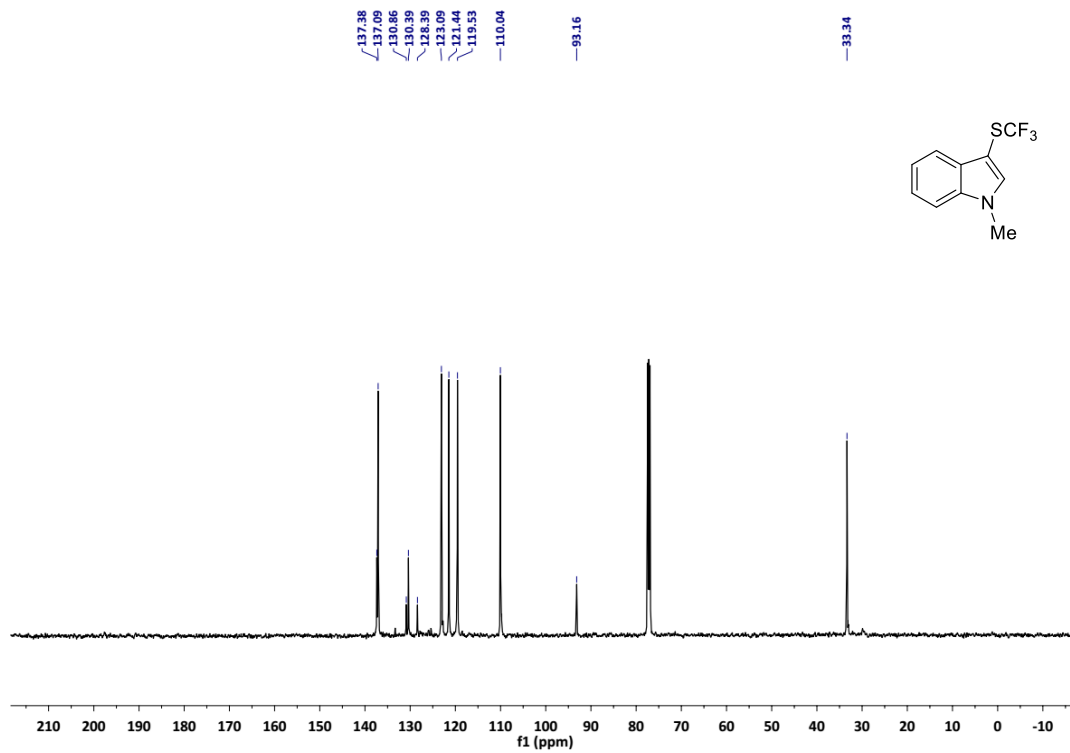

<sup>13</sup>C NMR spectrum (125 MHz, CDCl<sub>3</sub>) of **3b**

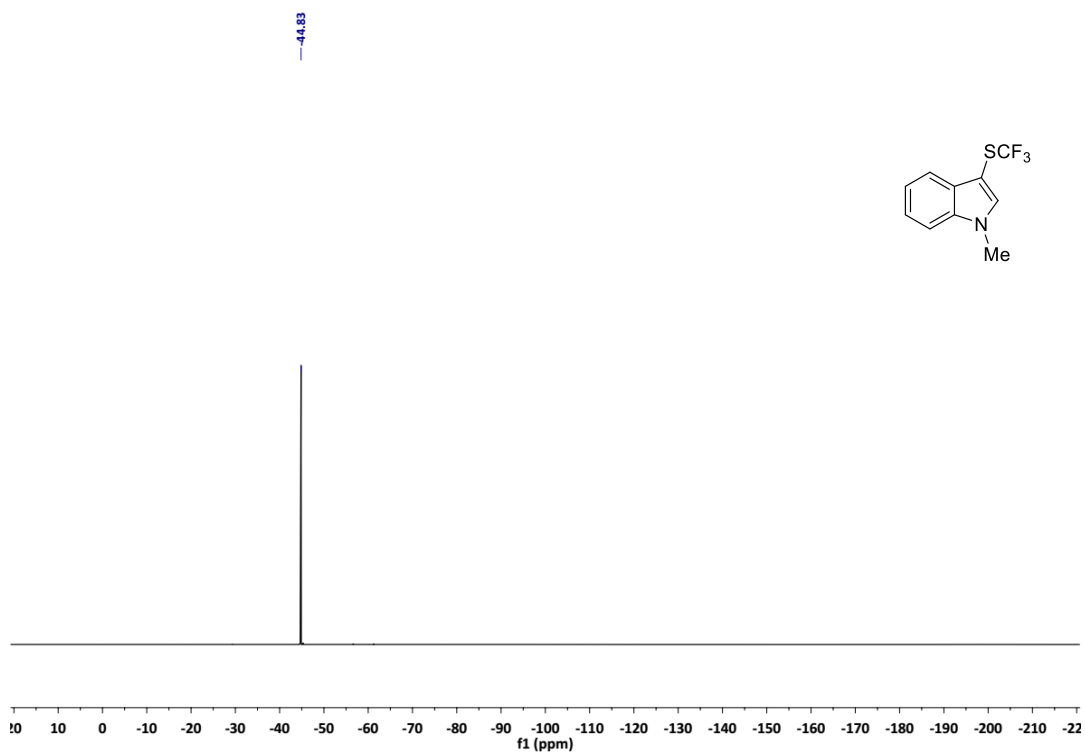

<sup>19</sup>F NMR spectrum (470 MHz, CDCl<sub>3</sub>) of **3b**



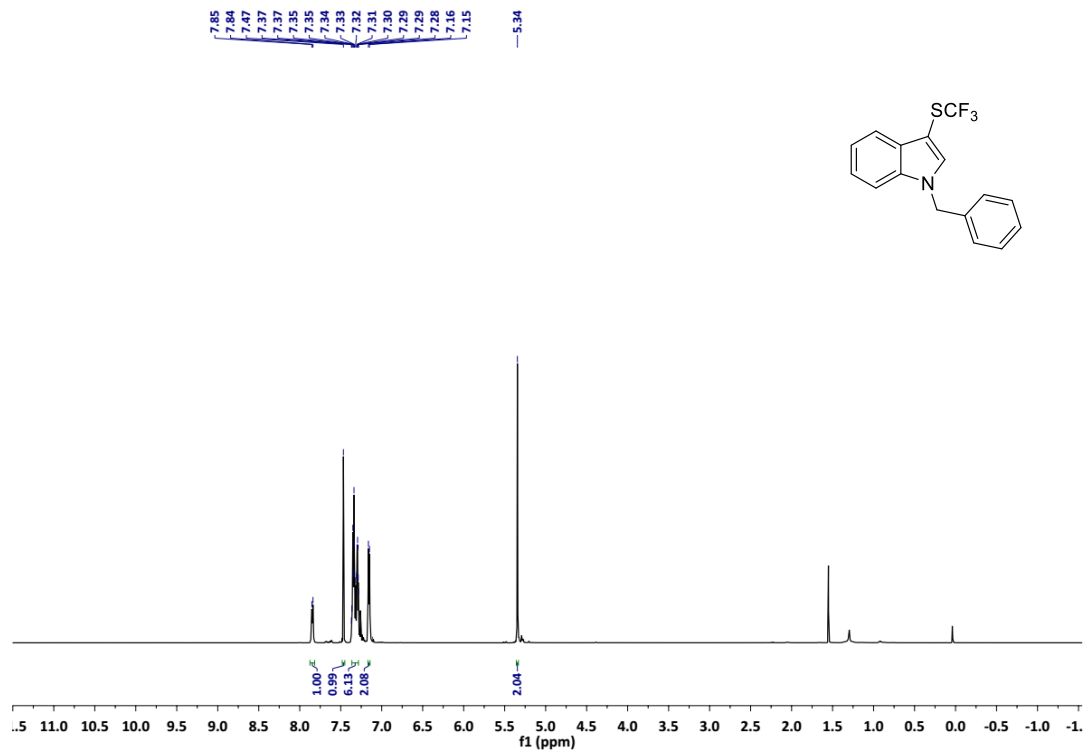

<sup>1</sup>H NMR spectrum (500 MHz, CDCl<sub>3</sub>) of **3c**

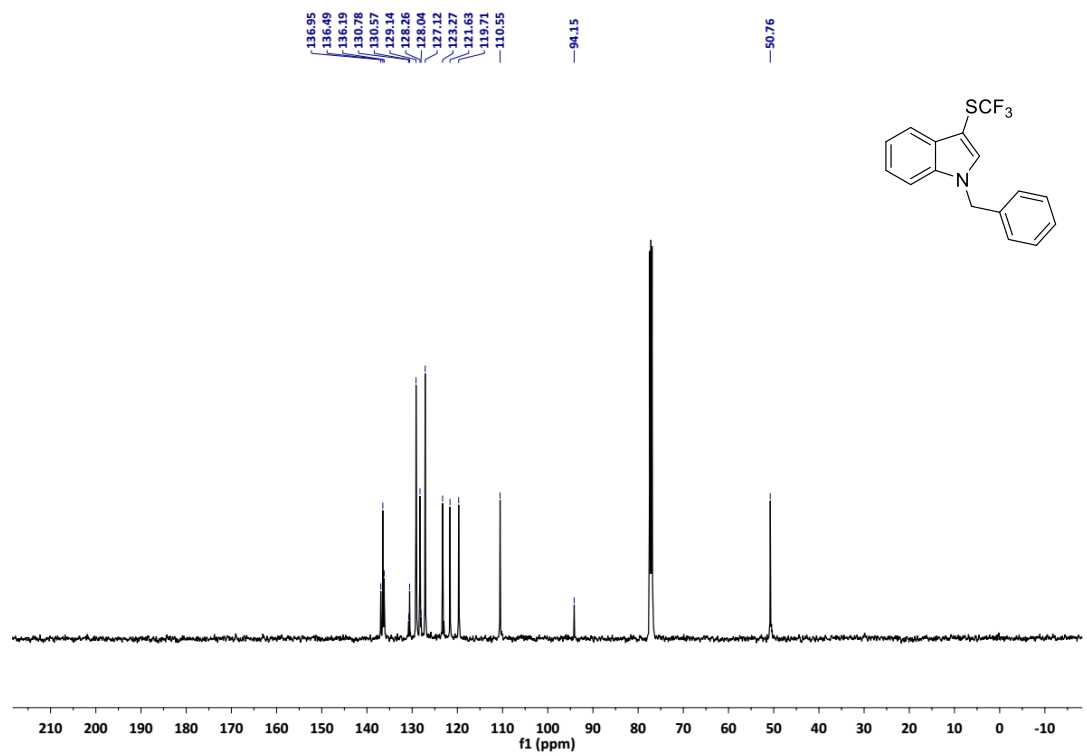

<sup>13</sup>C NMR spectrum (125 MHz, CDCl<sub>3</sub>) of **3c**

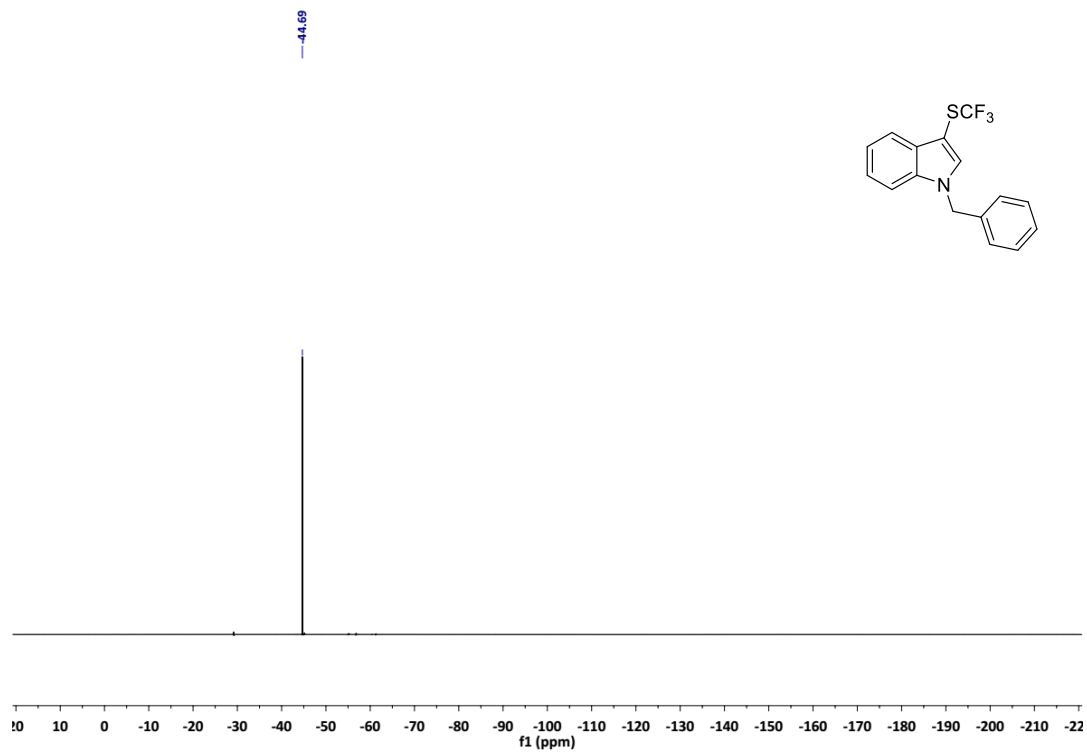

$^{19}\text{F}$  NMR spectrum (470 MHz,  $\text{CDCl}_3$ ) of **3c**

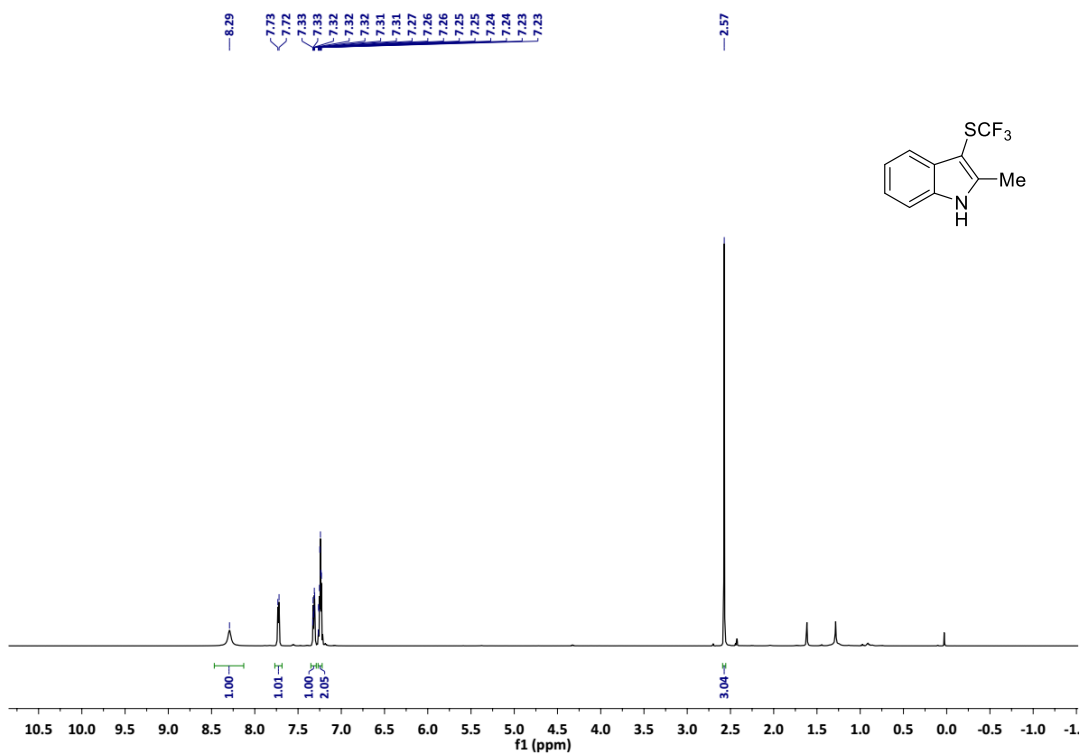

$^1\text{H}$  NMR spectrum (500 MHz,  $\text{CDCl}_3$ ) of **3d**

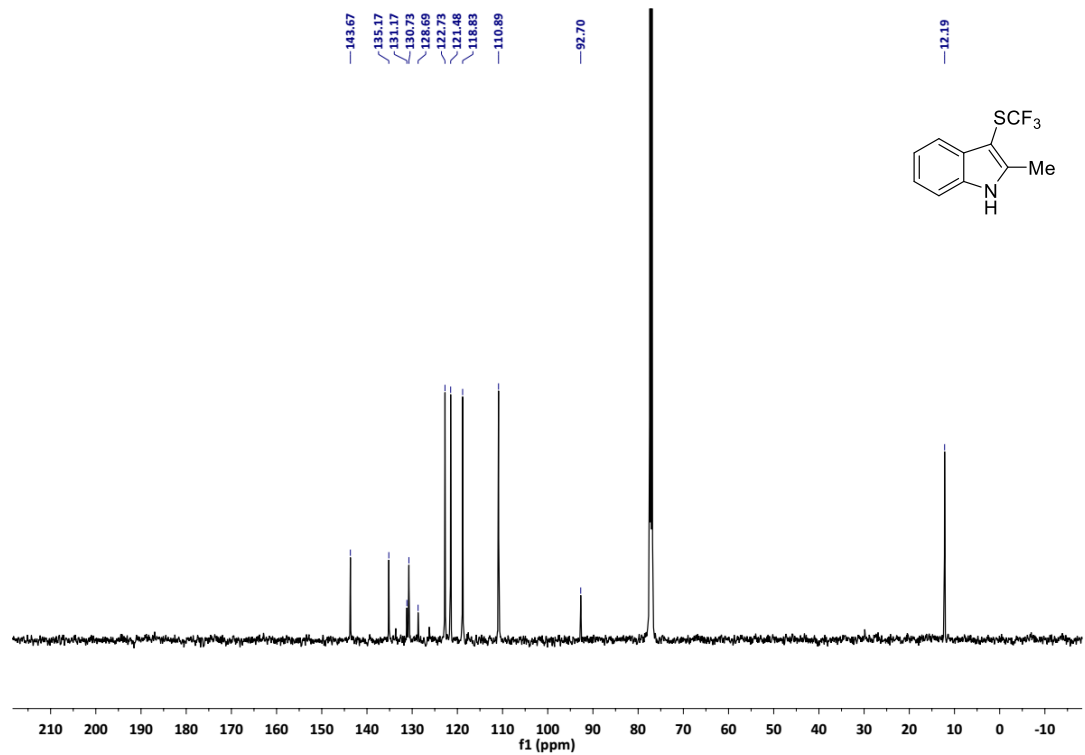

$^{13}\text{C}$  NMR spectrum (125 MHz,  $\text{CDCl}_3$ ) of **3d**

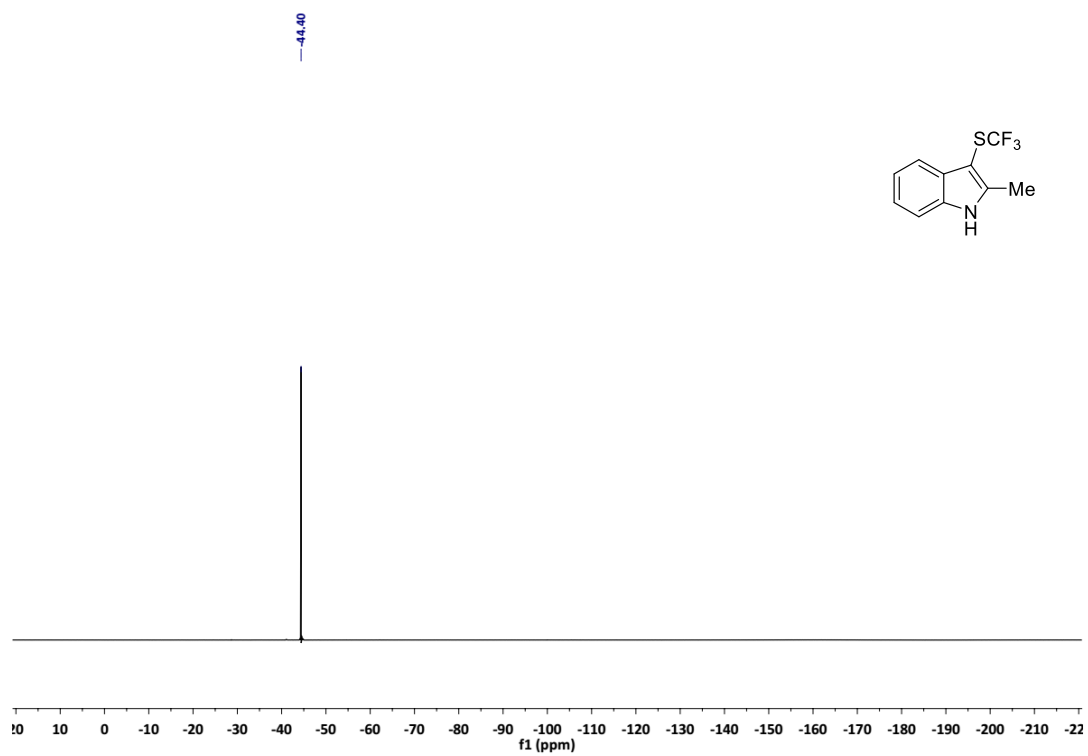

$^{19}\text{F}$  NMR spectrum (470 MHz,  $\text{CDCl}_3$ ) of **3d**

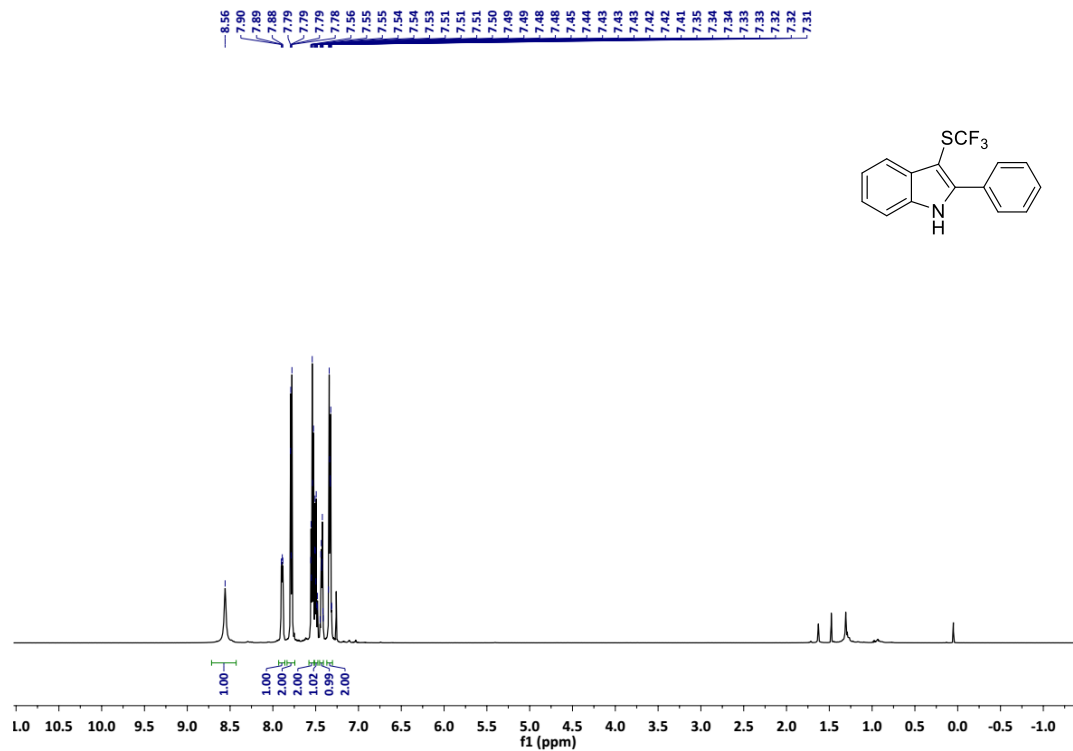

<sup>1</sup>H NMR spectrum (500 MHz, CDCl<sub>3</sub>) of 3e

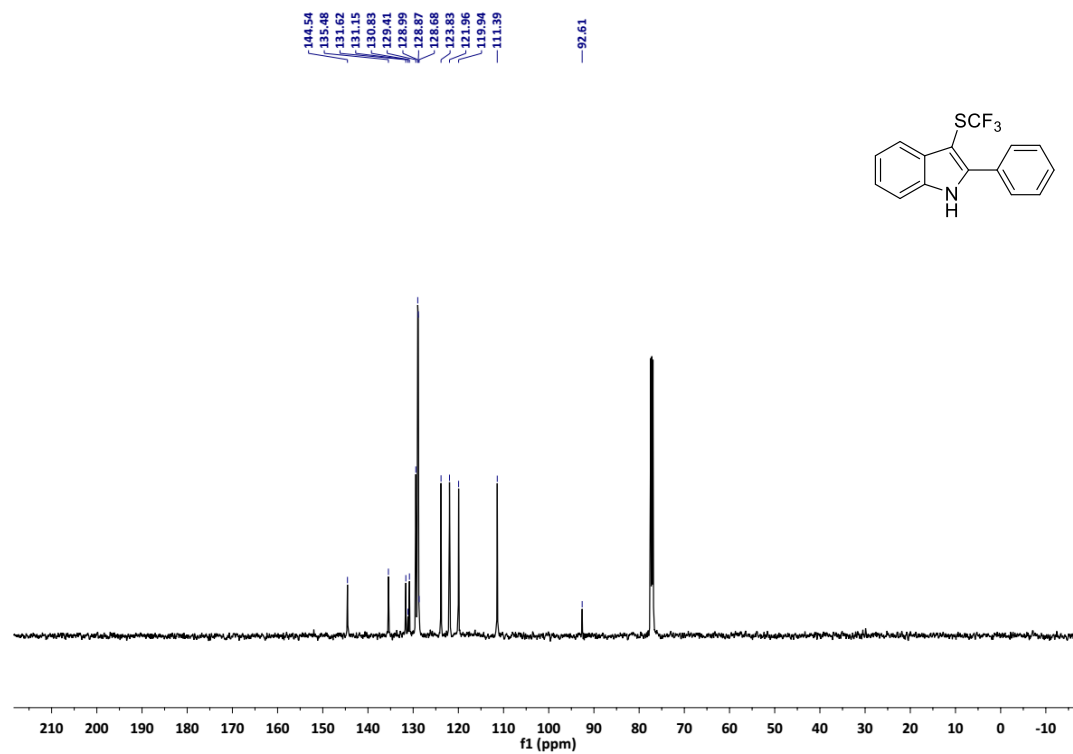

<sup>13</sup>C NMR spectrum (125 MHz, CDCl<sub>3</sub>) of 3e

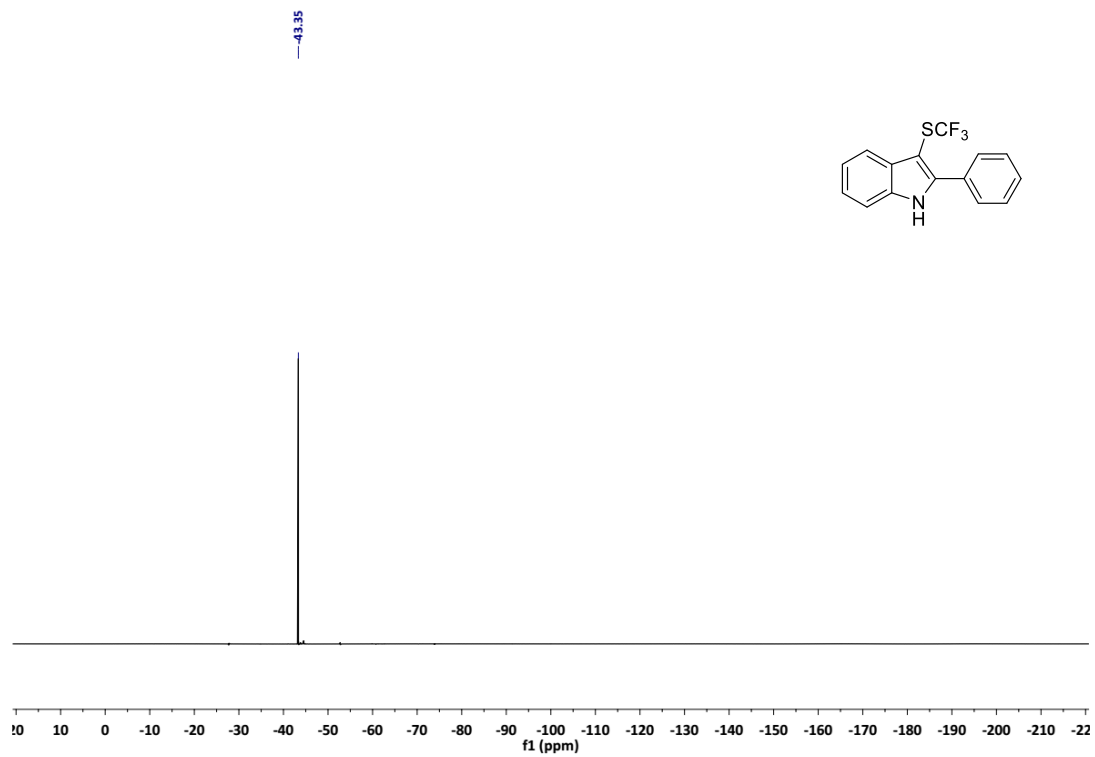

$^{19}\text{F}$  NMR spectrum (470 MHz,  $\text{CDCl}_3$ ) of **3e**

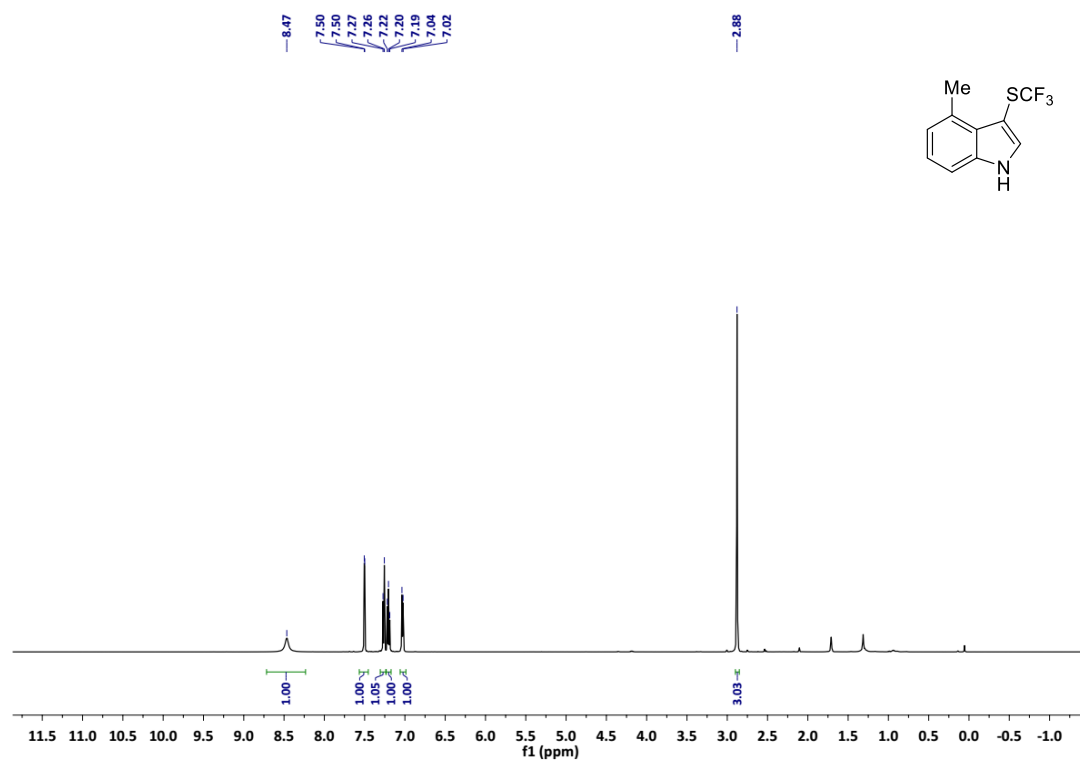

$^1\text{H}$  NMR spectrum (500 MHz,  $\text{CDCl}_3$ ) of **3f**

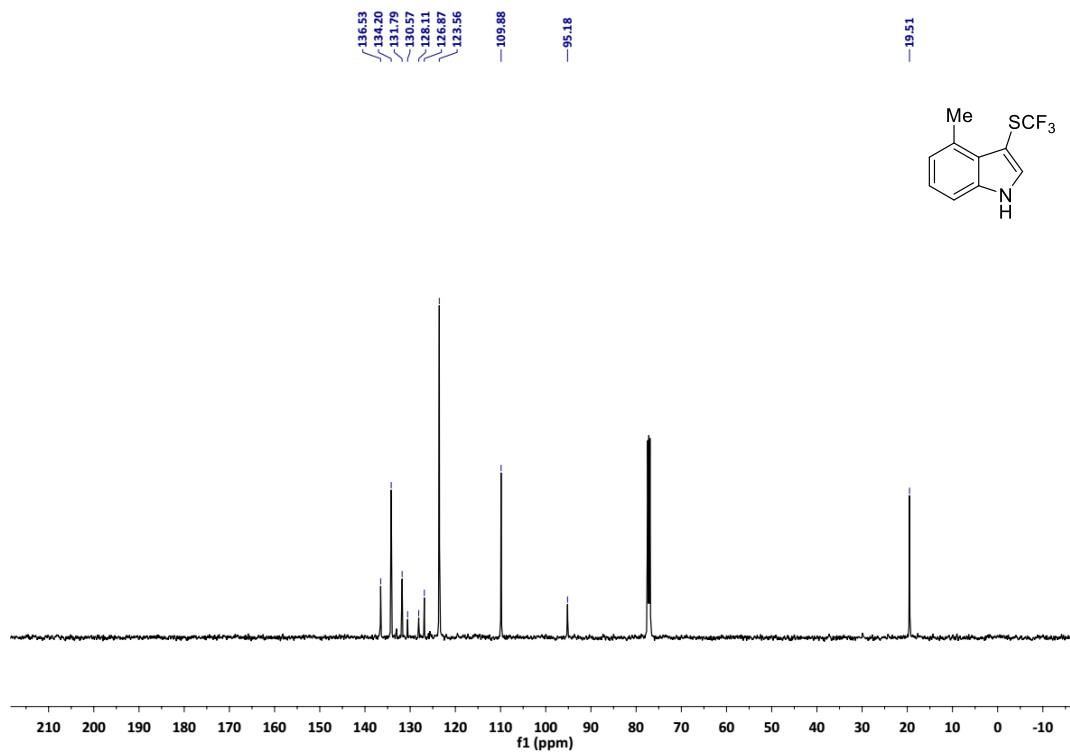

<sup>13</sup>C NMR spectrum (125 MHz, CDCl<sub>3</sub>) of **3f**

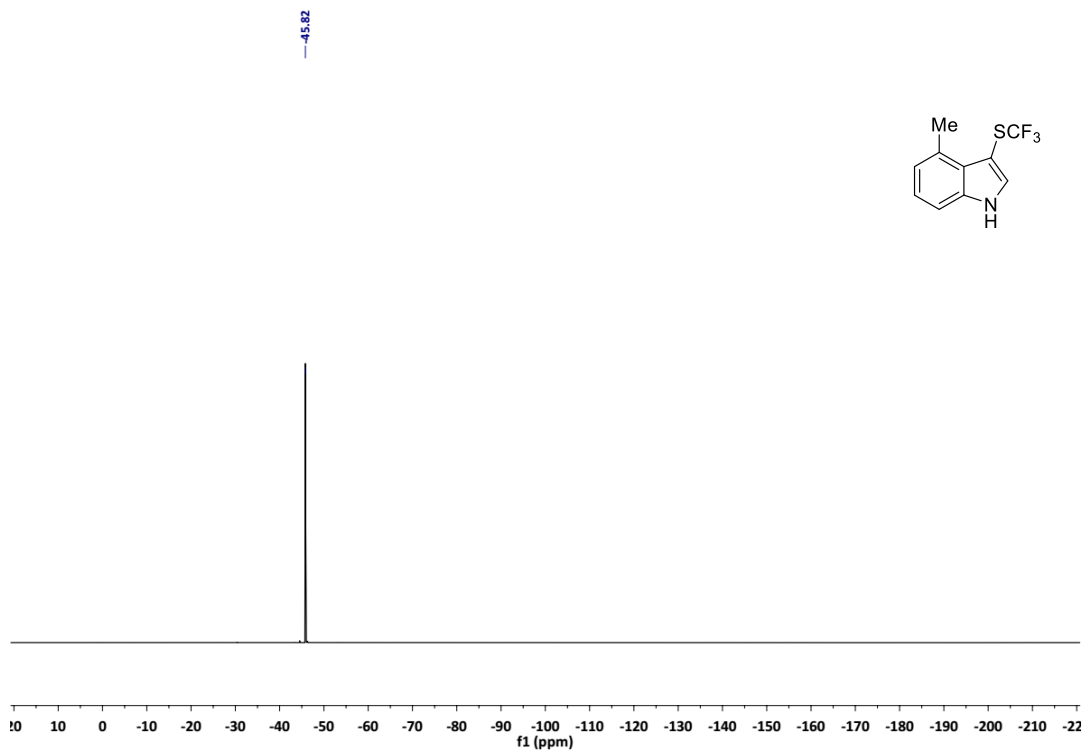

<sup>19</sup>F NMR spectrum (470 MHz, CDCl<sub>3</sub>) of **3f**

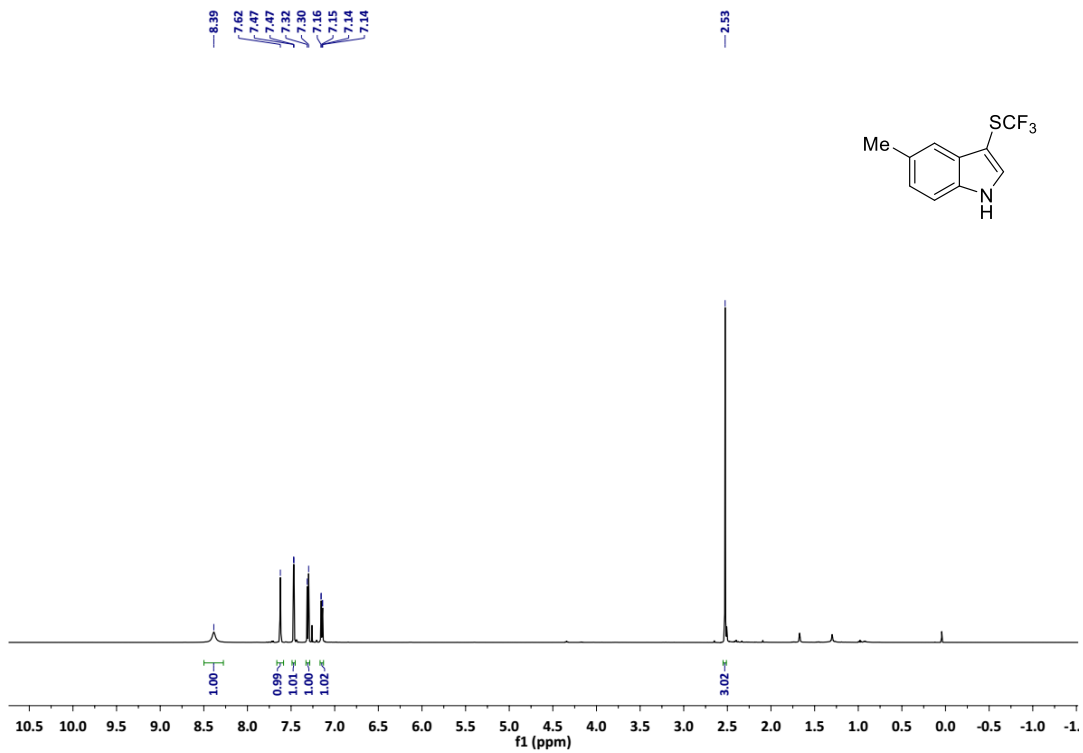

<sup>1</sup>H NMR spectrum (500 MHz, CDCl<sub>3</sub>) of **3g**

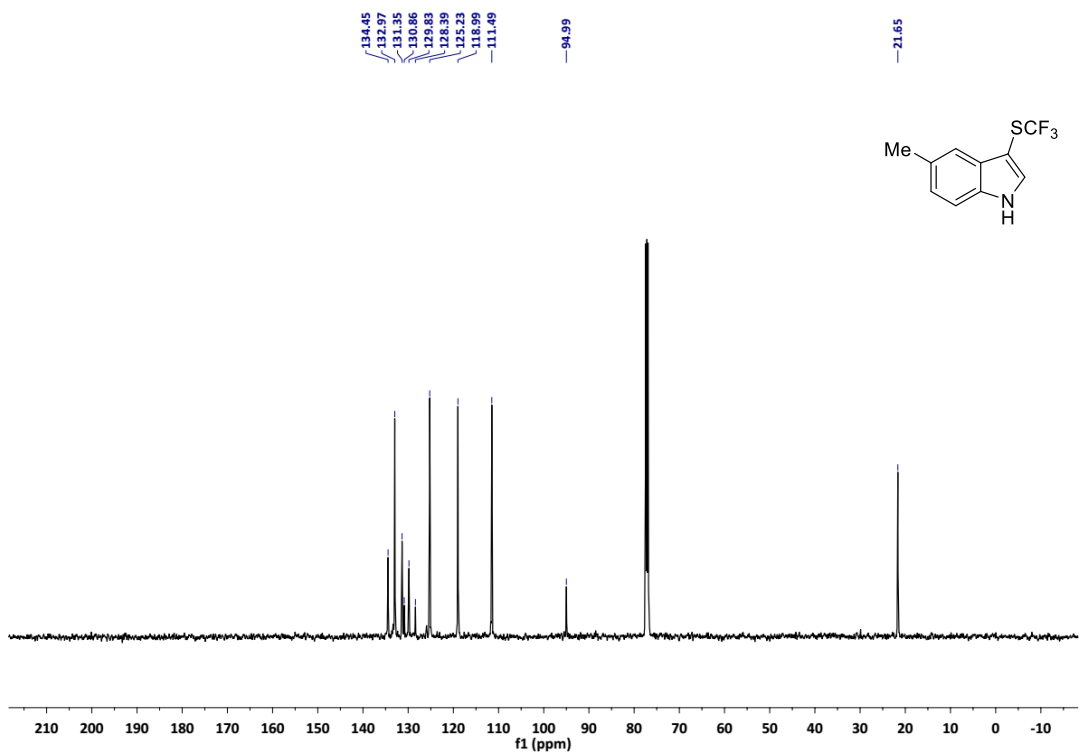

<sup>13</sup>C NMR spectrum (125 MHz, CDCl<sub>3</sub>) of **3g**

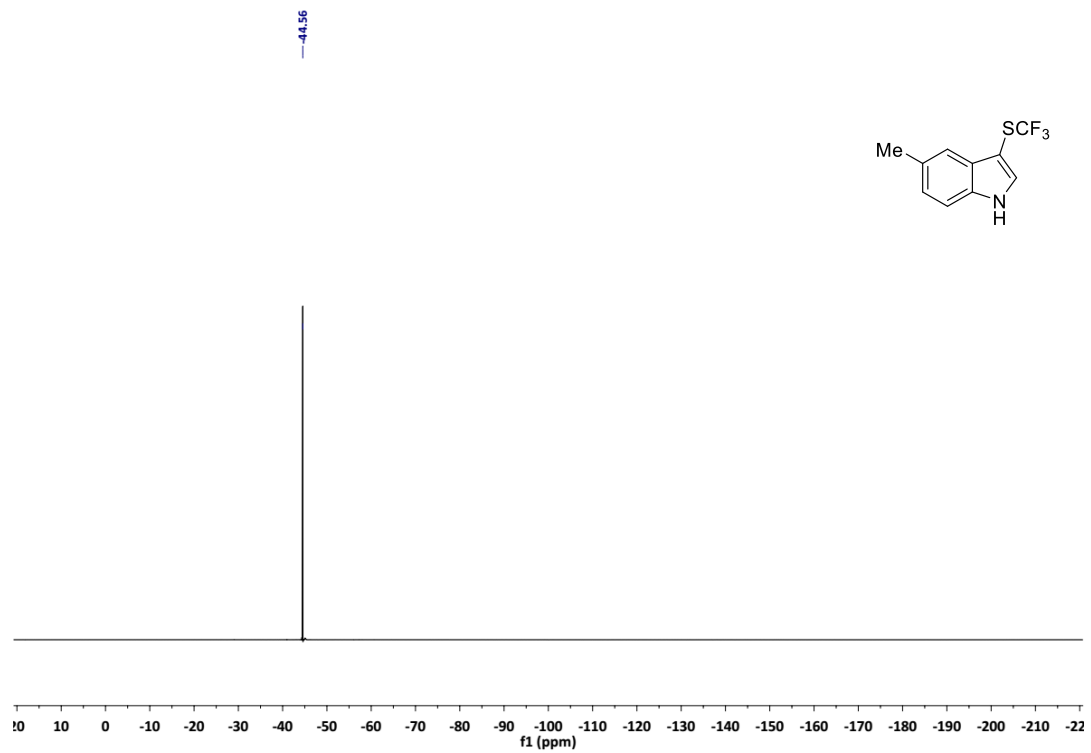

<sup>19</sup>F NMR spectrum (470 MHz, CDCl<sub>3</sub>) of **3g**

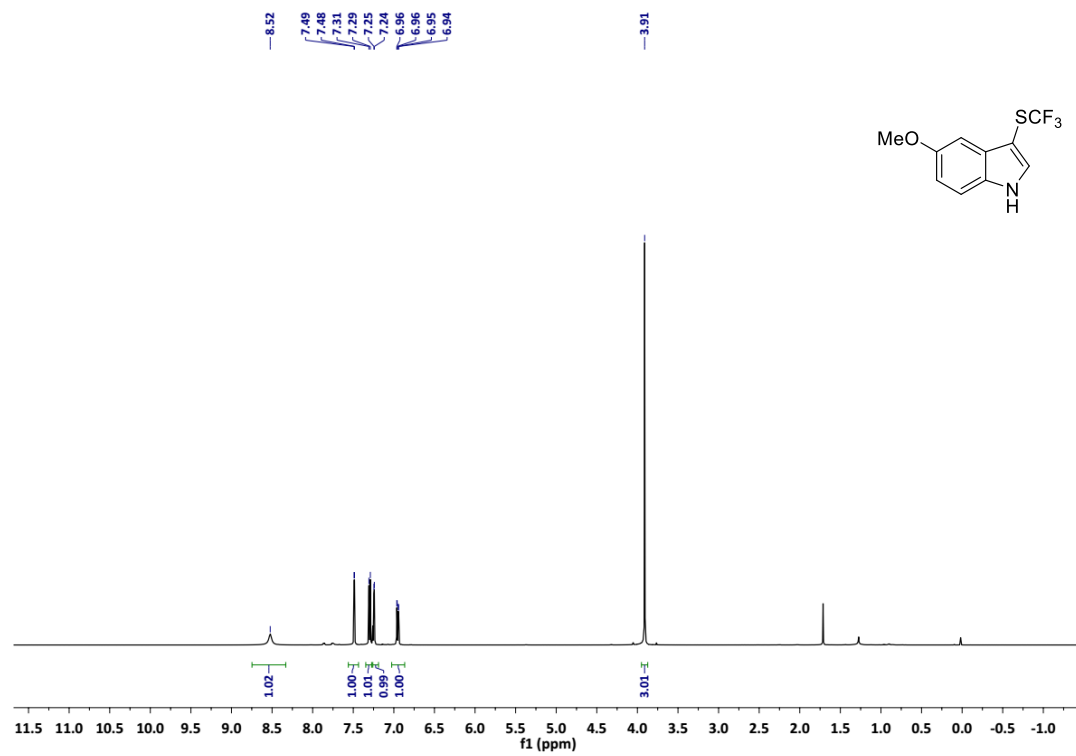

<sup>1</sup>H NMR spectrum (500 MHz, CDCl<sub>3</sub>) of **3h**



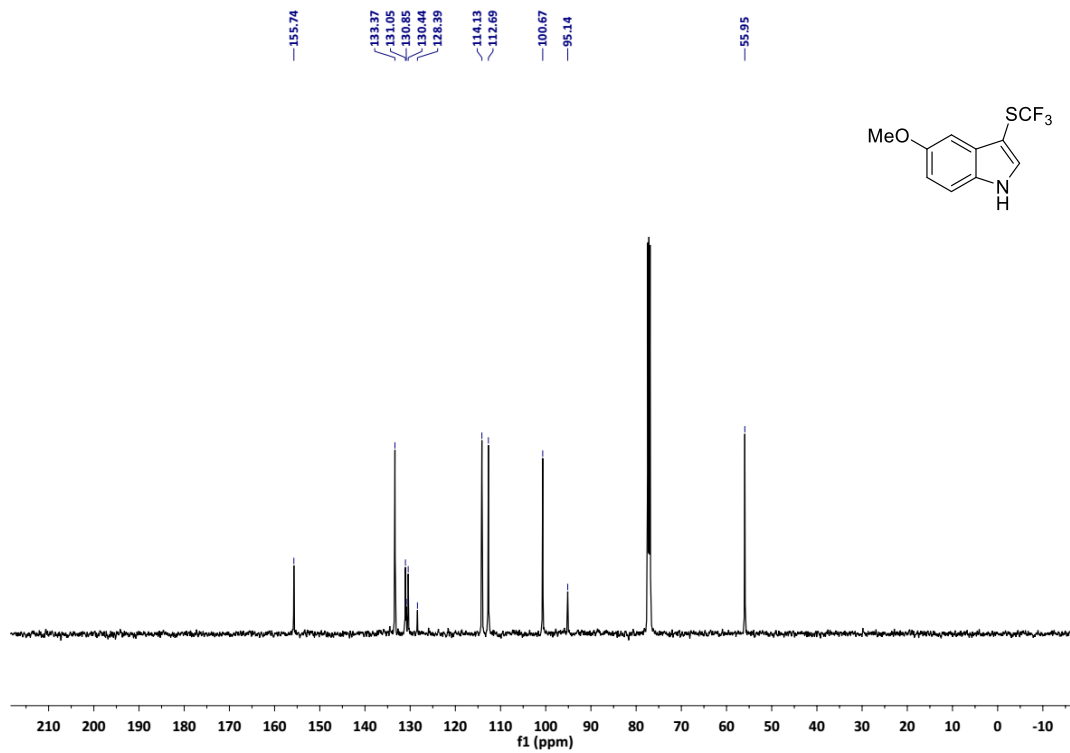

<sup>13</sup>C NMR spectrum (125 MHz, CDCl<sub>3</sub>) of **3h**

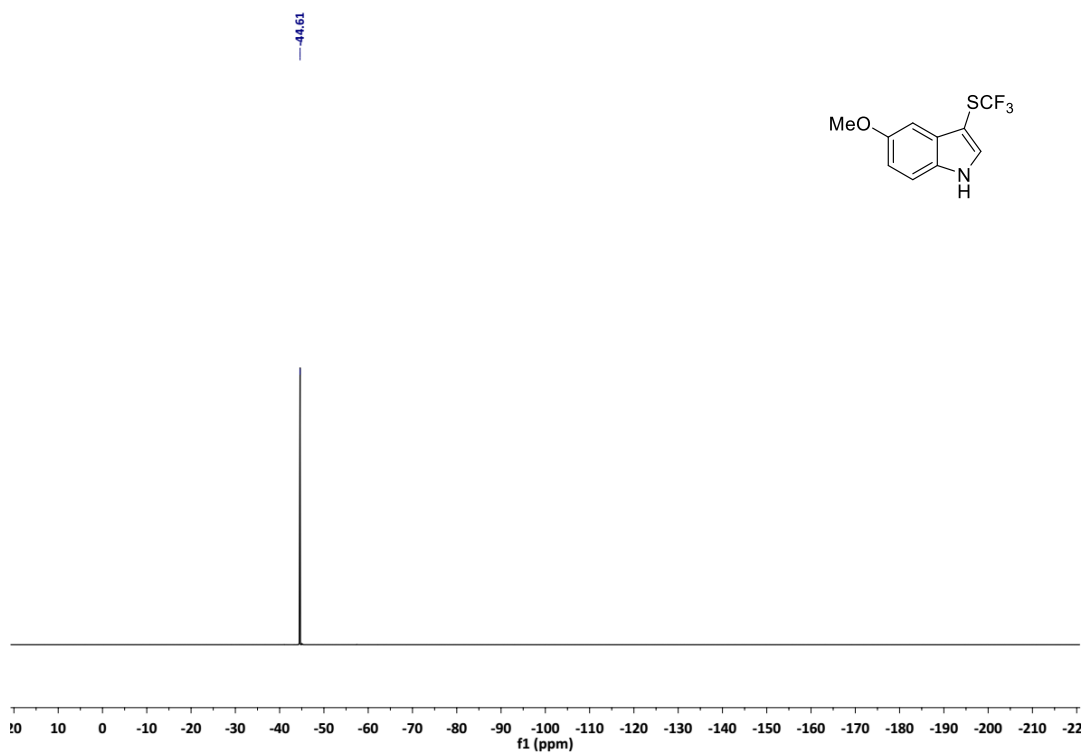

<sup>19</sup>F NMR spectrum (470 MHz, CDCl<sub>3</sub>) of **3h**

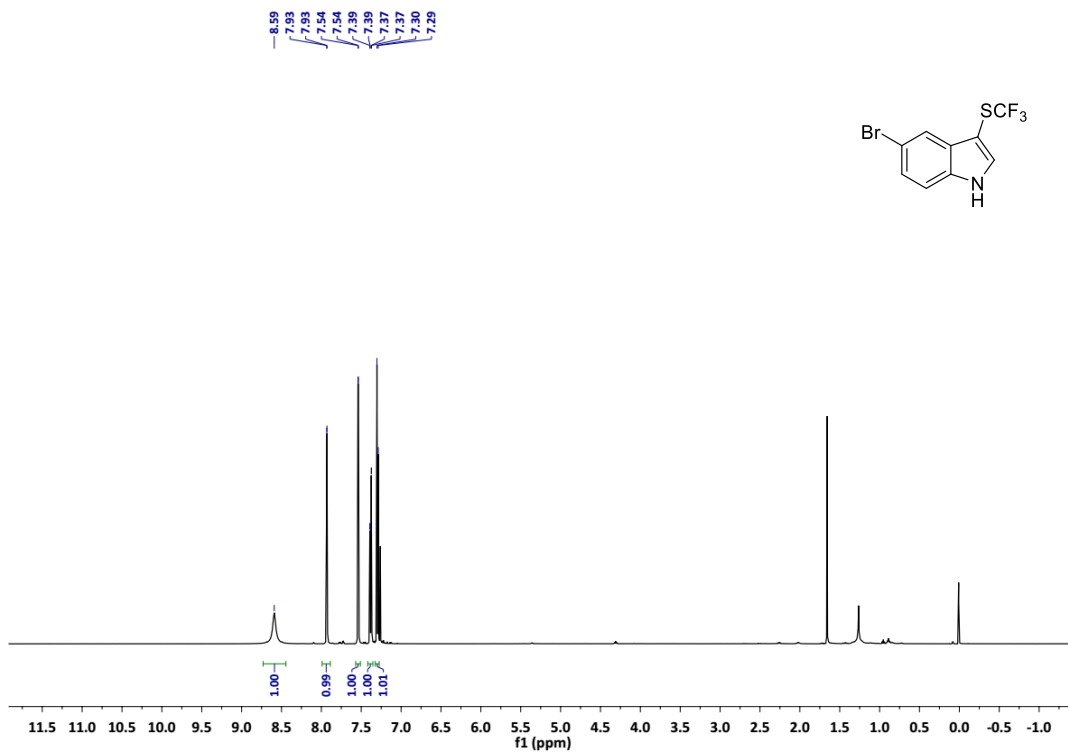

<sup>1</sup>H NMR spectrum (500 MHz, CDCl<sub>3</sub>) of **3i**

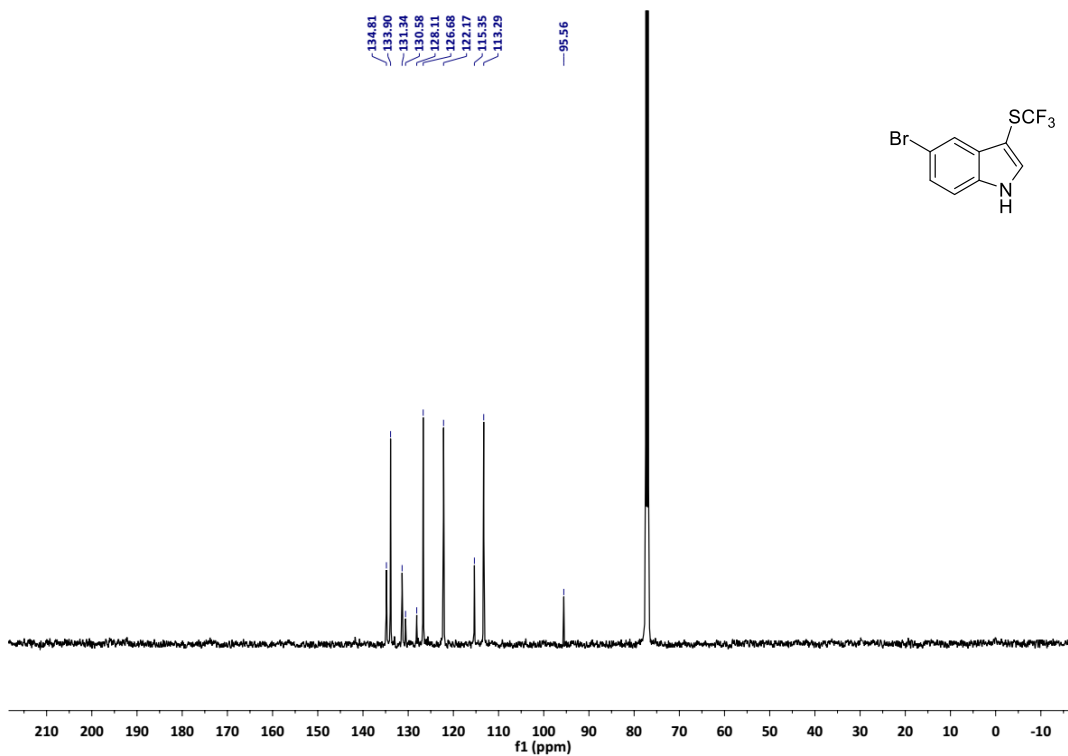

<sup>13</sup>C NMR spectrum (125 MHz, CDCl<sub>3</sub>) of **3i**

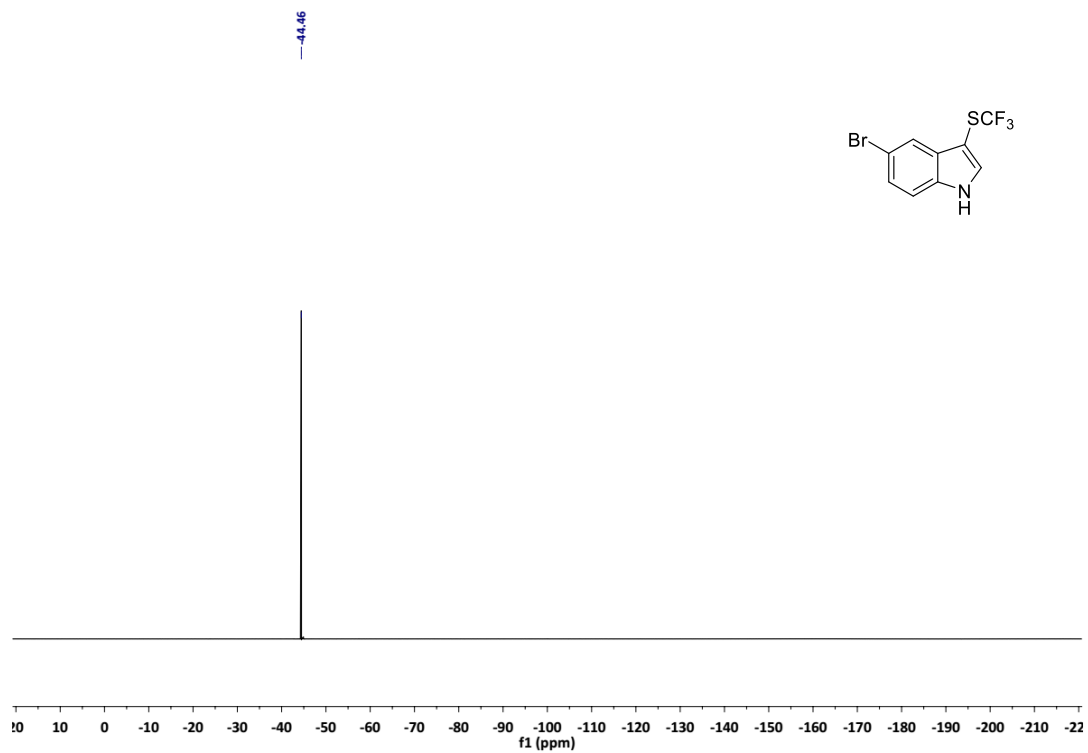

$^{19}\text{F}$  NMR spectrum (470 MHz,  $\text{CDCl}_3$ ) of **3i**

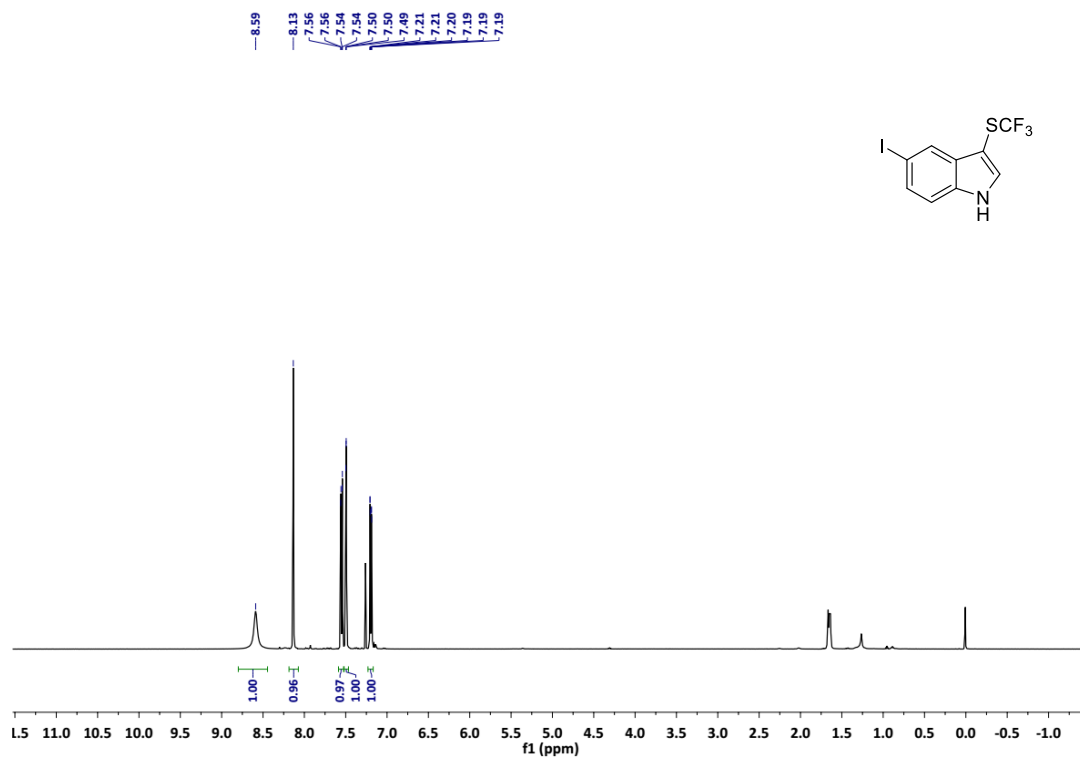

$^1\text{H}$  NMR spectrum (500 MHz,  $\text{CDCl}_3$ ) of **3j**

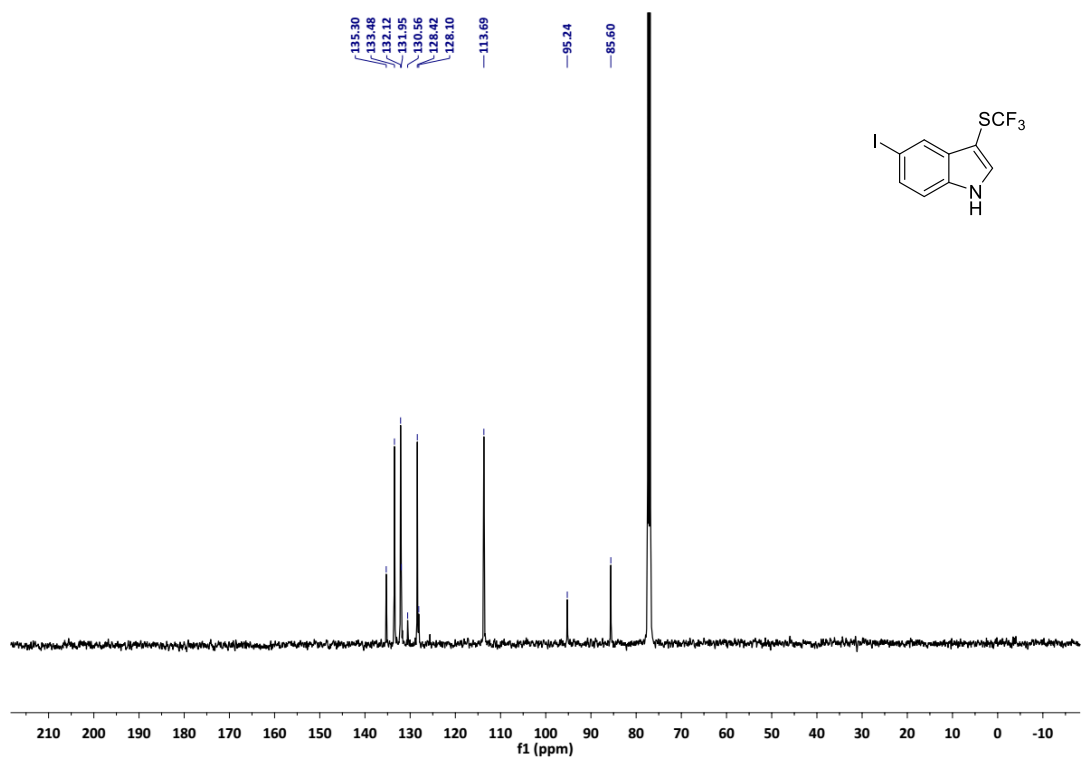

<sup>13</sup>C NMR spectrum (125 MHz, CDCl<sub>3</sub>) of **3j**

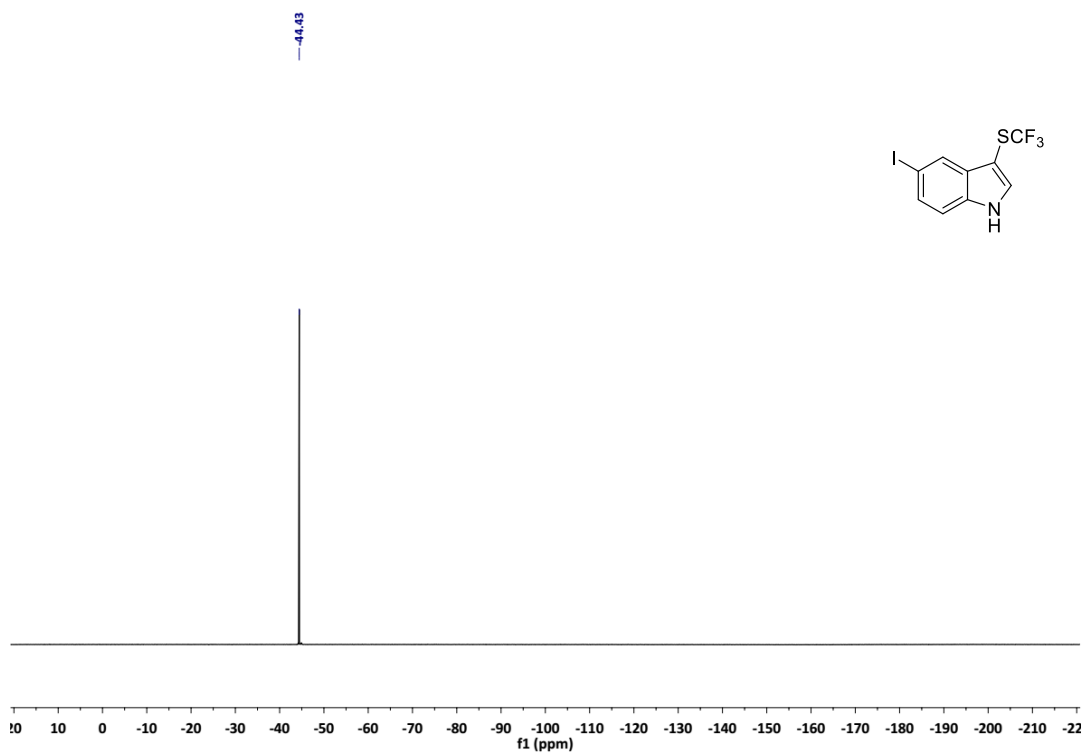

<sup>19</sup>F NMR spectrum (470 MHz, CDCl<sub>3</sub>) of **3j**

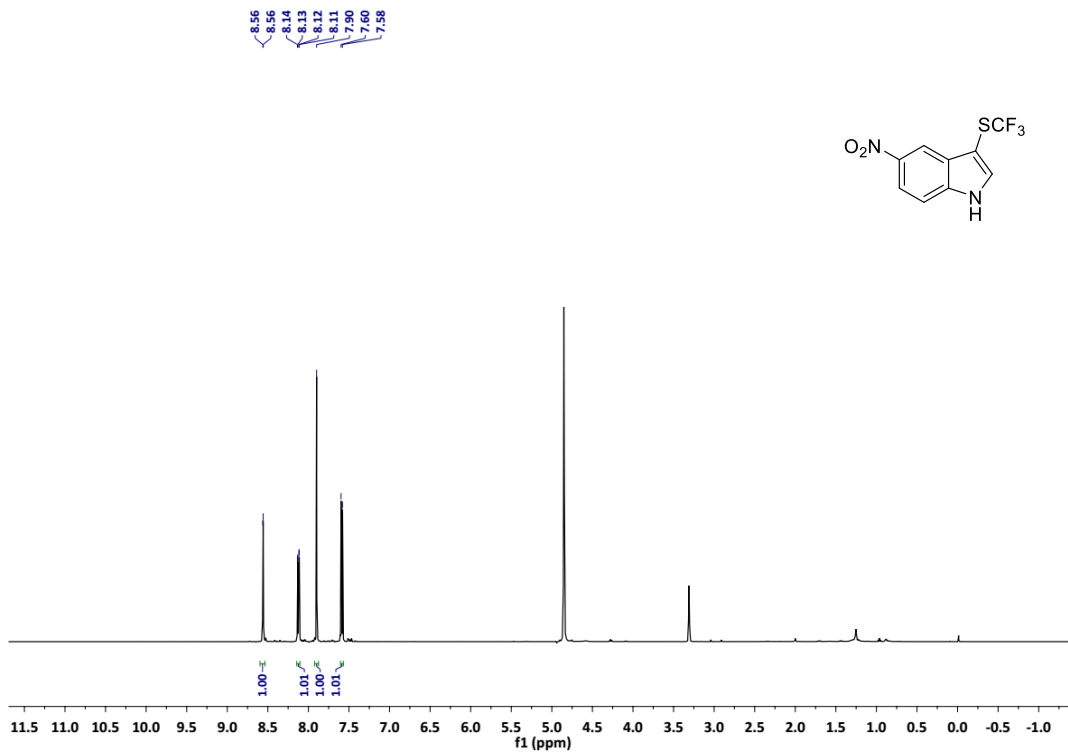

<sup>1</sup>H NMR spectrum (500 MHz, CD<sub>3</sub>OD) of **3k**

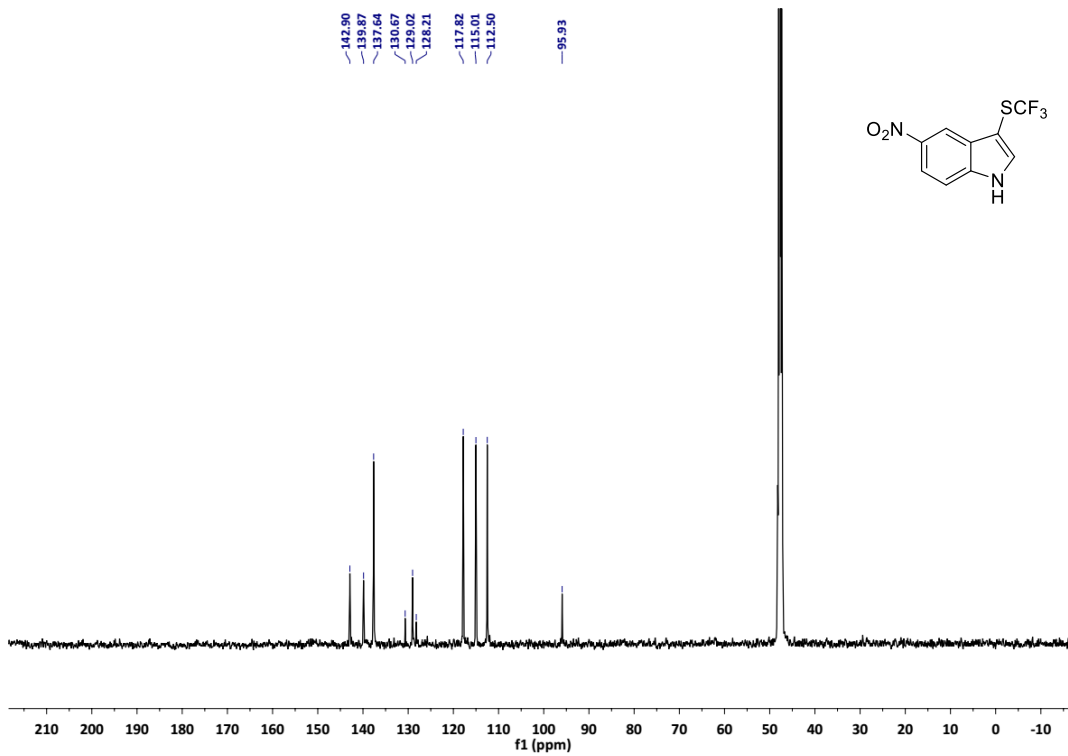

<sup>13</sup>C NMR spectrum (125 MHz, CD<sub>3</sub>OD) of **3k**

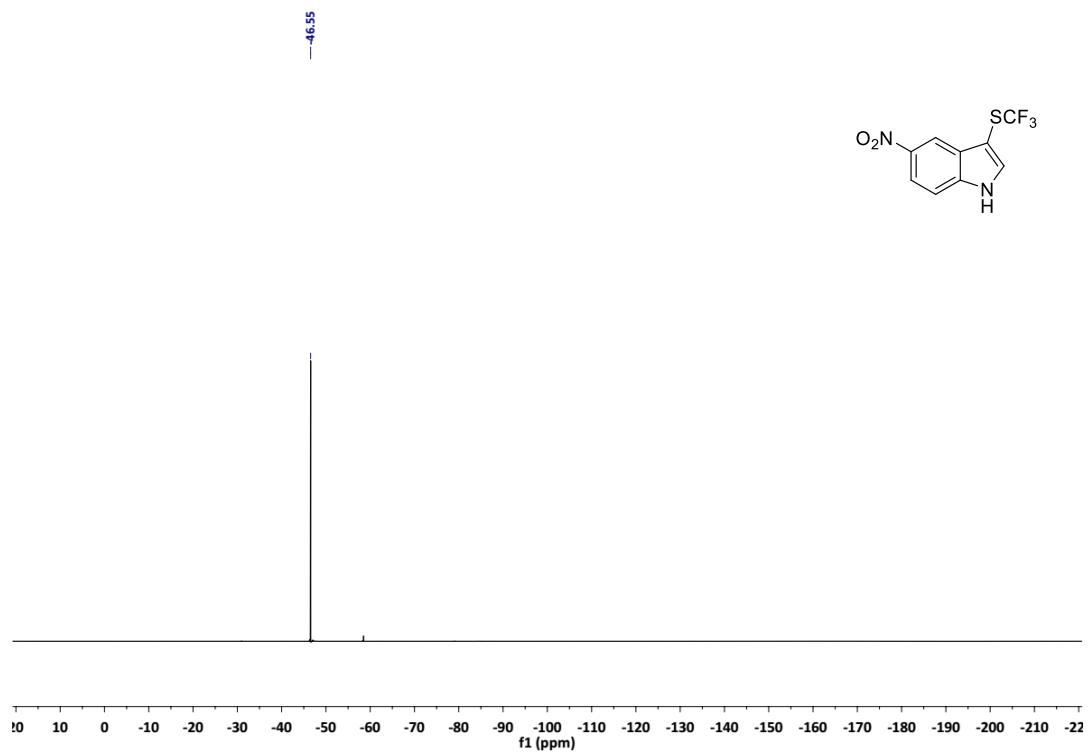

$^{19}\text{F}$  NMR spectrum (470 MHz,  $\text{CD}_3\text{OD}$ ) of **3k**

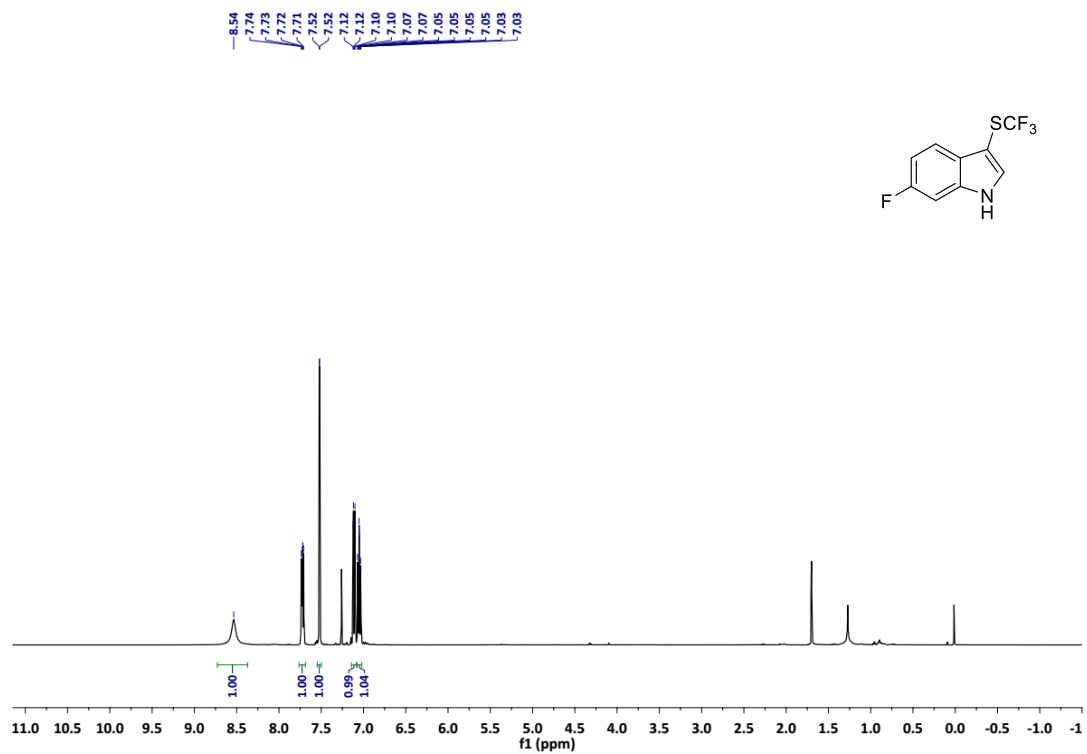

$^1\text{H}$  NMR spectrum (500 MHz,  $\text{CDCl}_3$ ) of **3l**

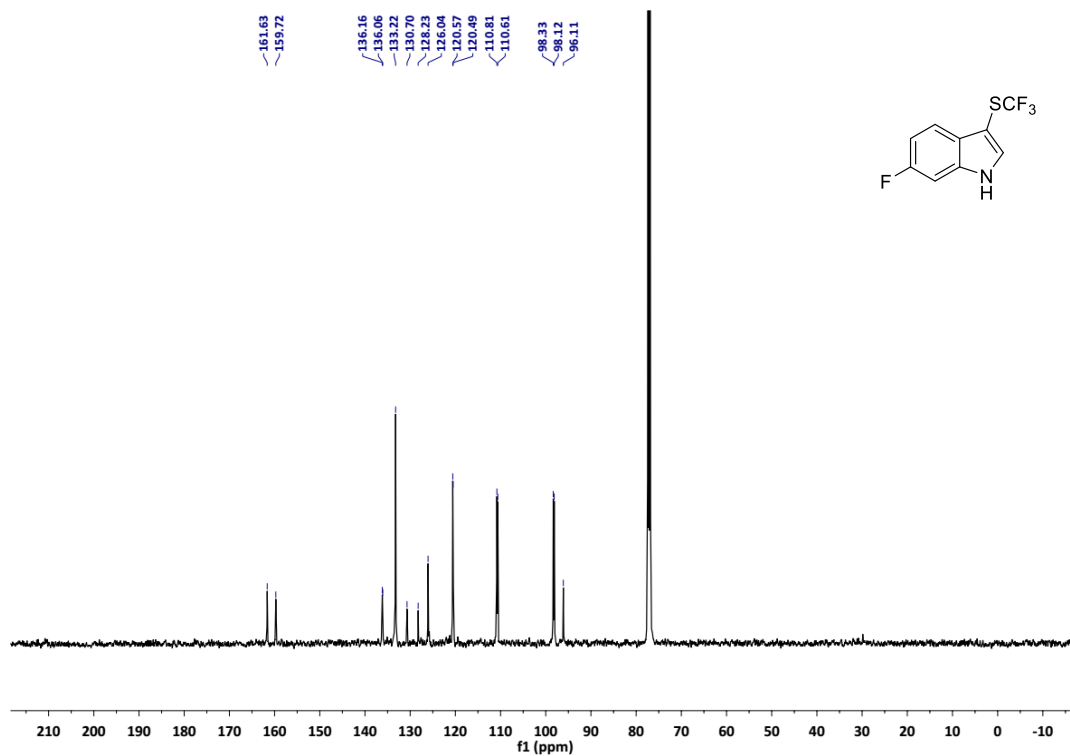

<sup>13</sup>C NMR spectrum (125 MHz, CDCl<sub>3</sub>) of **3I**

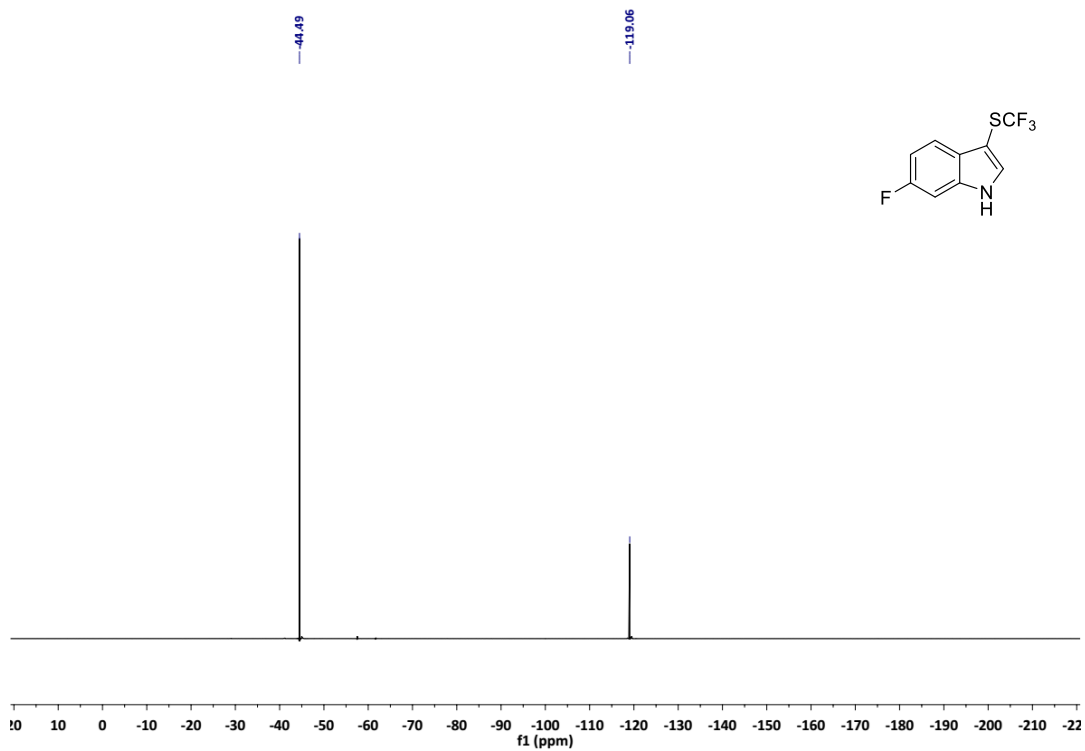

<sup>19</sup>F NMR spectrum (470 MHz, CDCl<sub>3</sub>) of **3I**

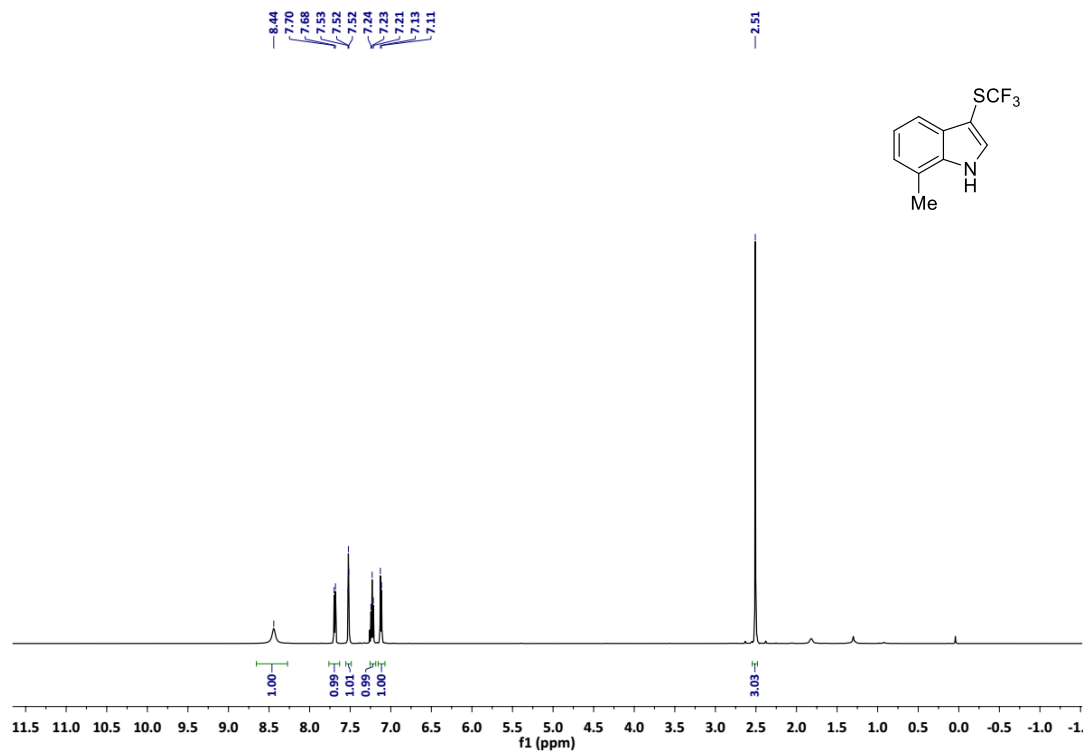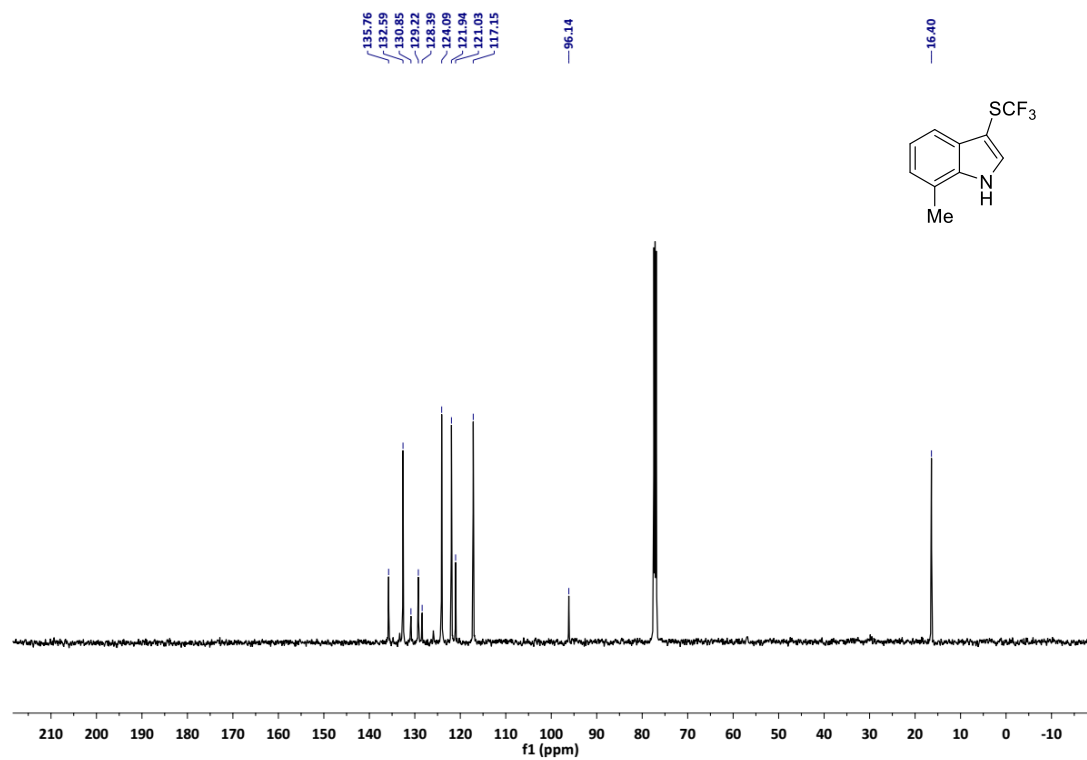



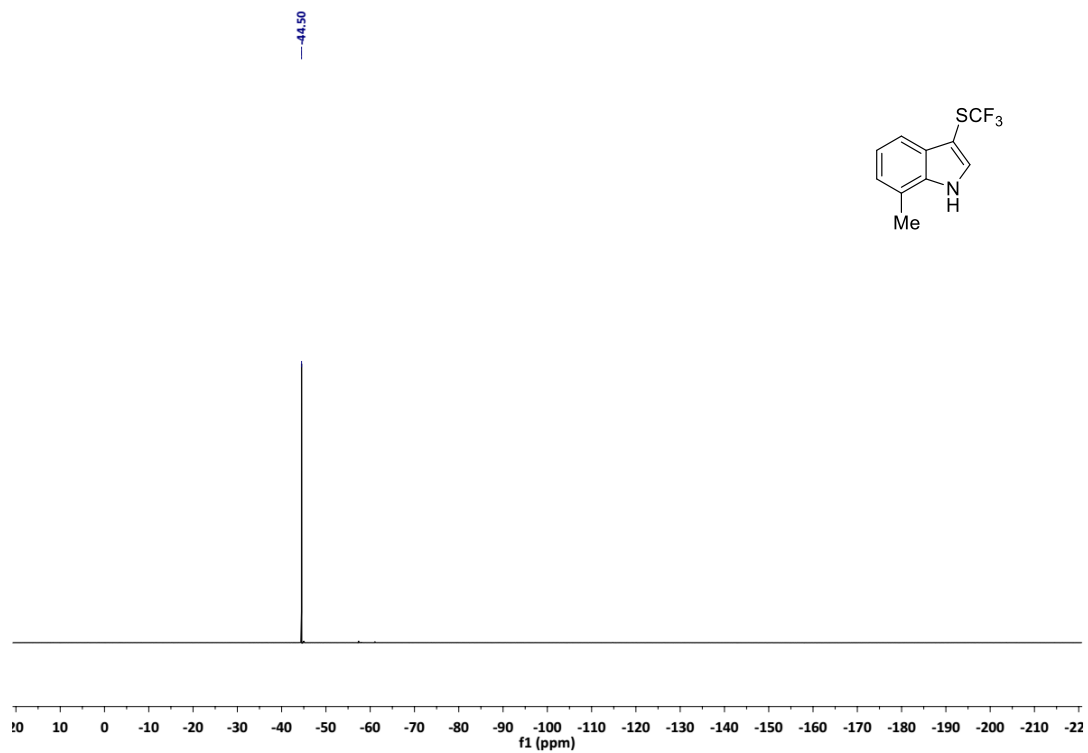

<sup>19</sup>F NMR spectrum (470 MHz, CDCl<sub>3</sub>) of **3m**

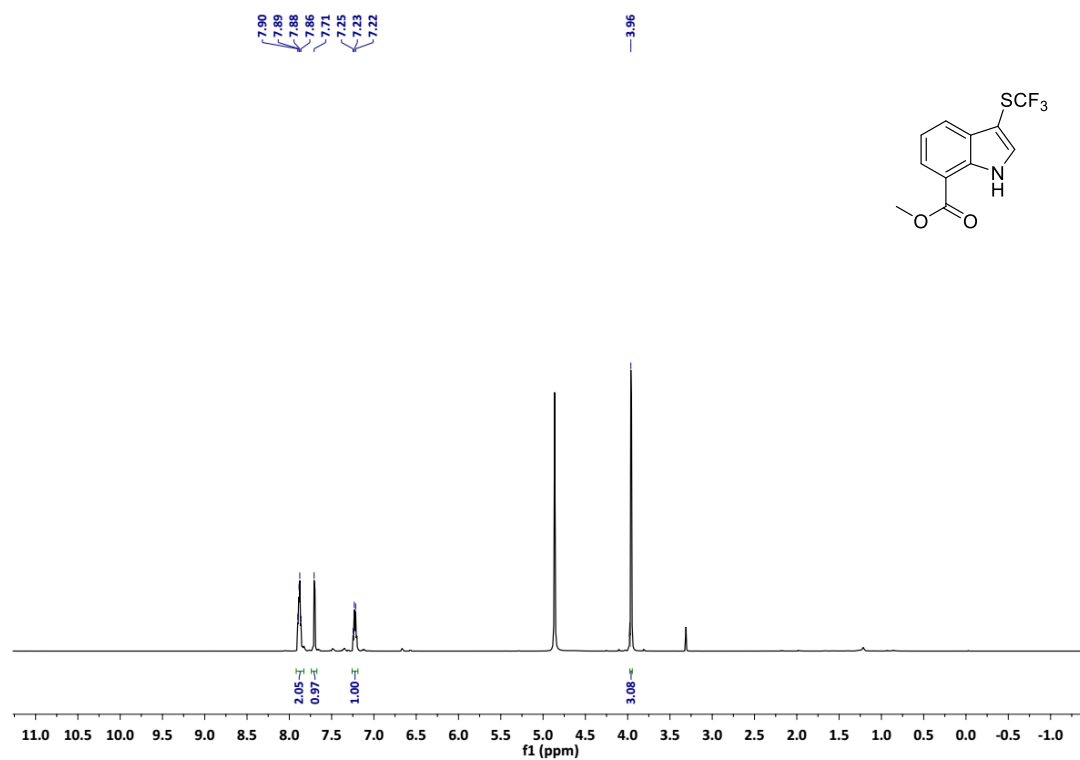

<sup>1</sup>H NMR spectrum (500 MHz, CD<sub>3</sub>OD) of **3n**

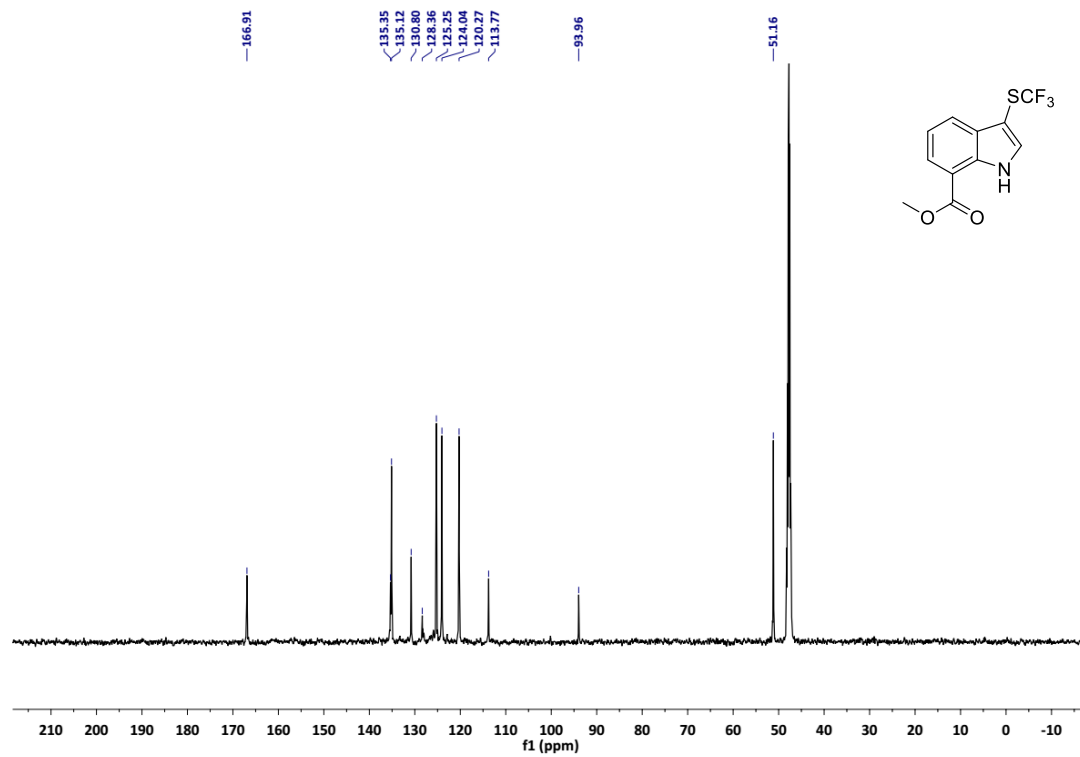

$^{13}\text{C}$  NMR spectrum (125 MHz,  $\text{CD}_3\text{OD}$ ) of **3n**

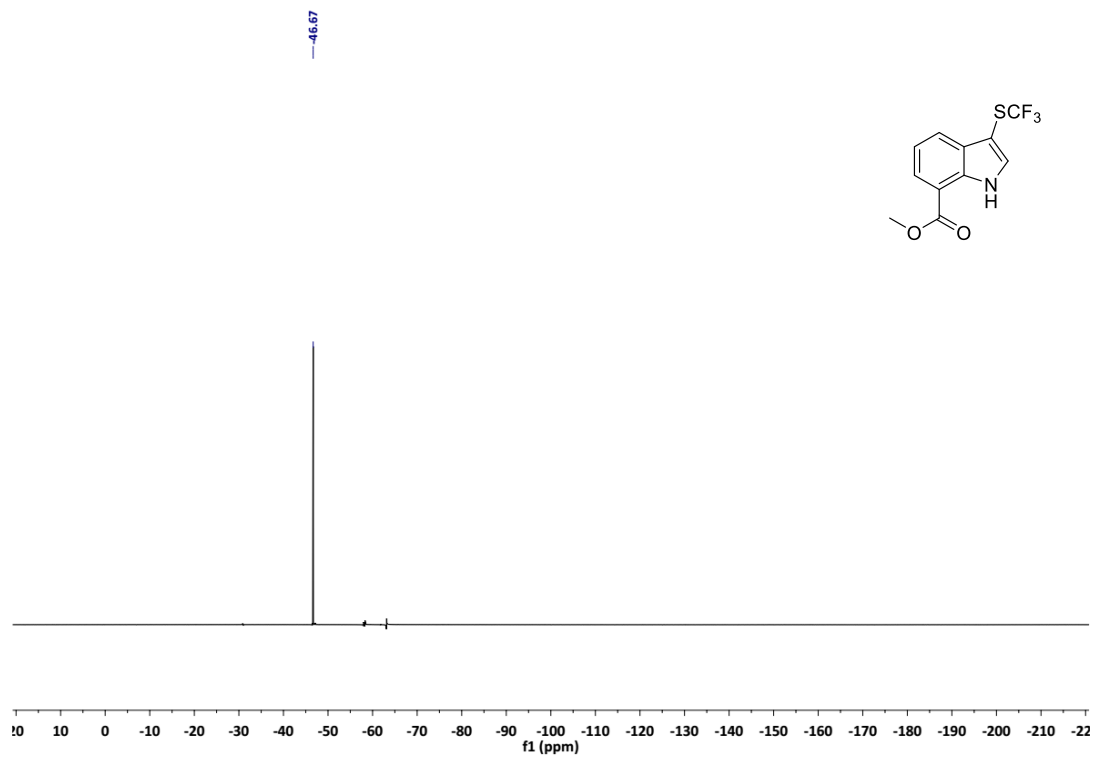

$^{19}\text{F}$  NMR spectrum (470 MHz,  $\text{CD}_3\text{OD}$ ) of **3n**

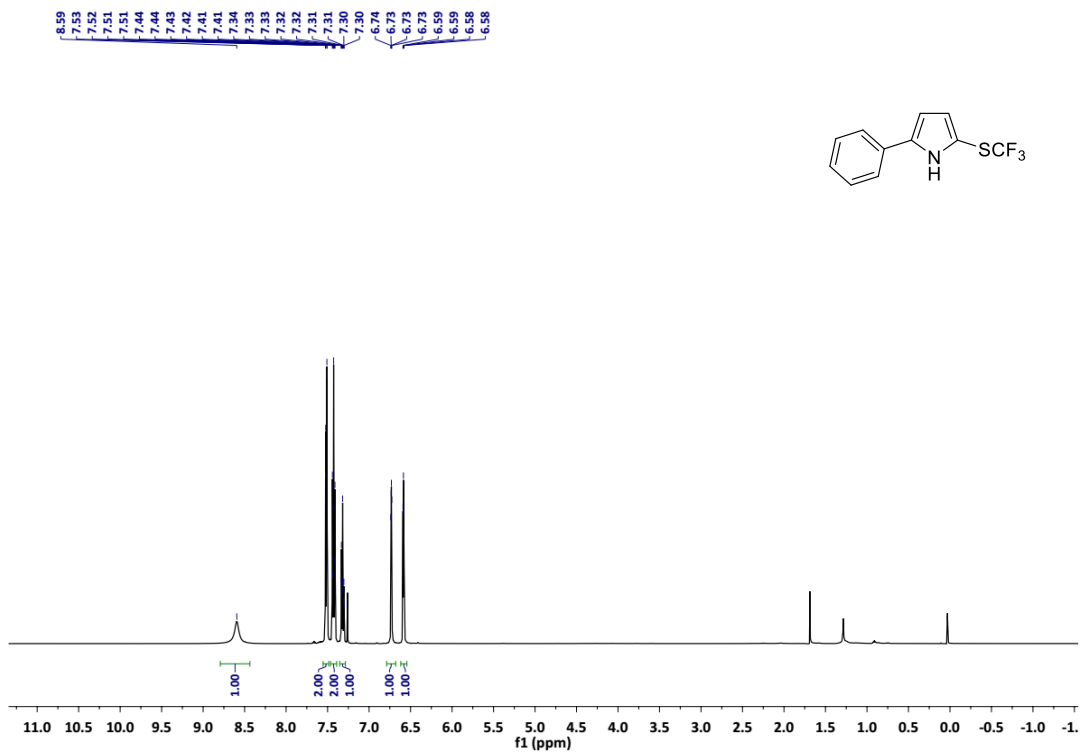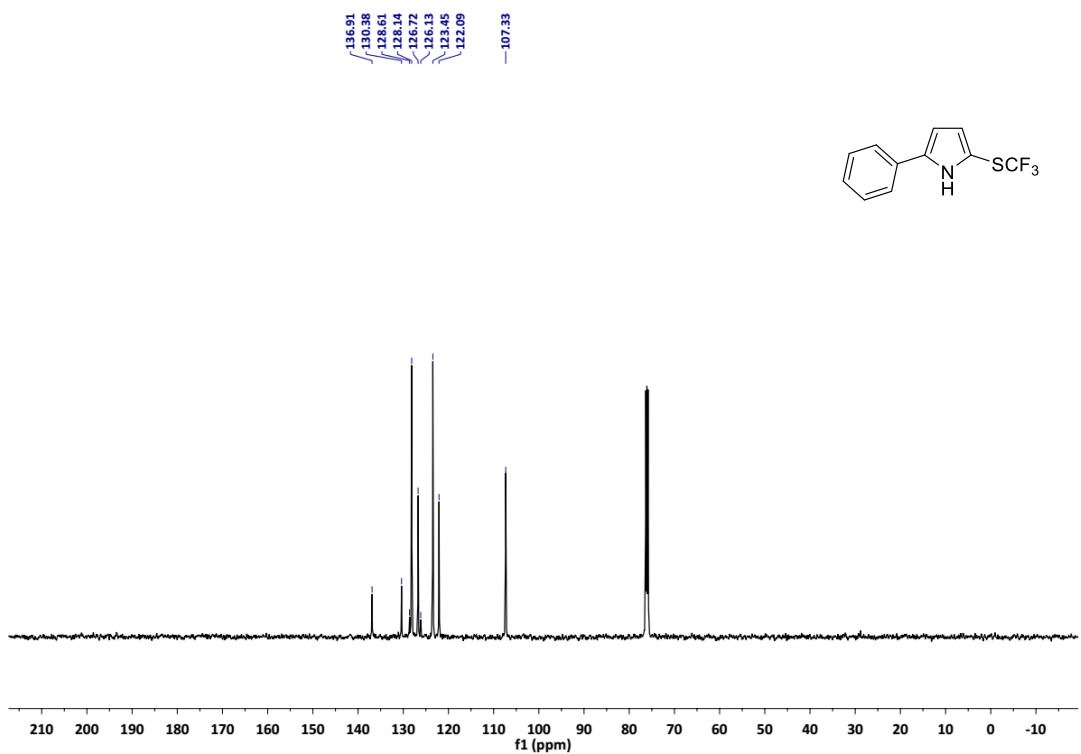

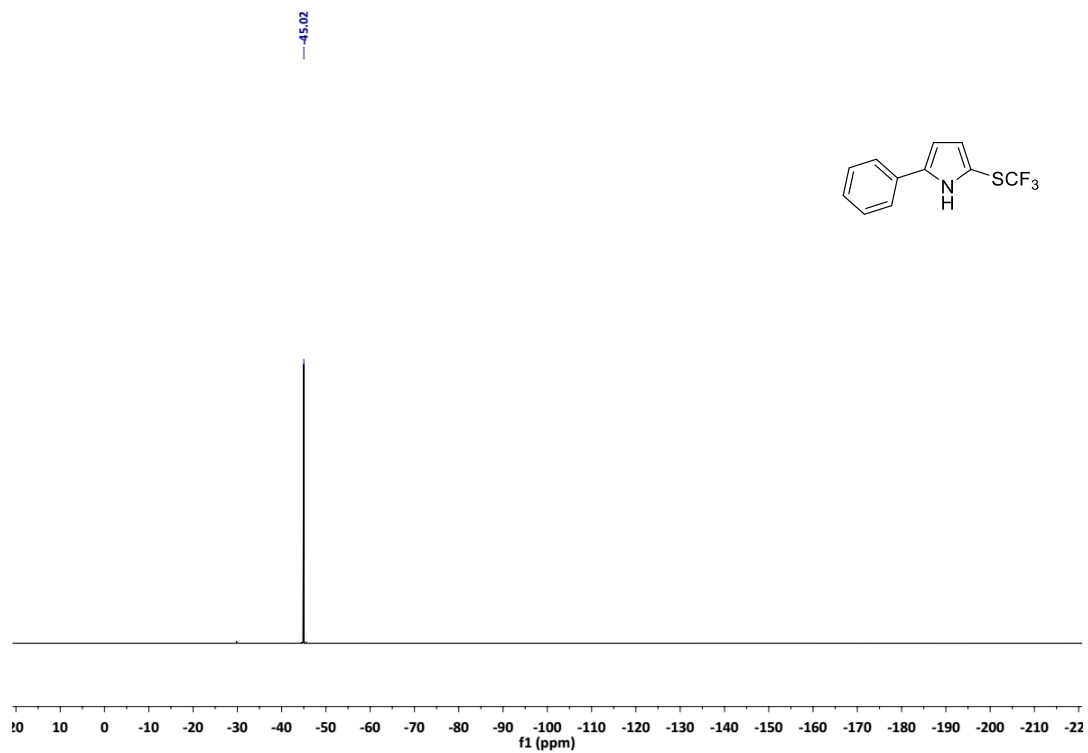

$^{19}\text{F}$  NMR spectrum (470 MHz,  $\text{CDCl}_3$ ) of **6a**

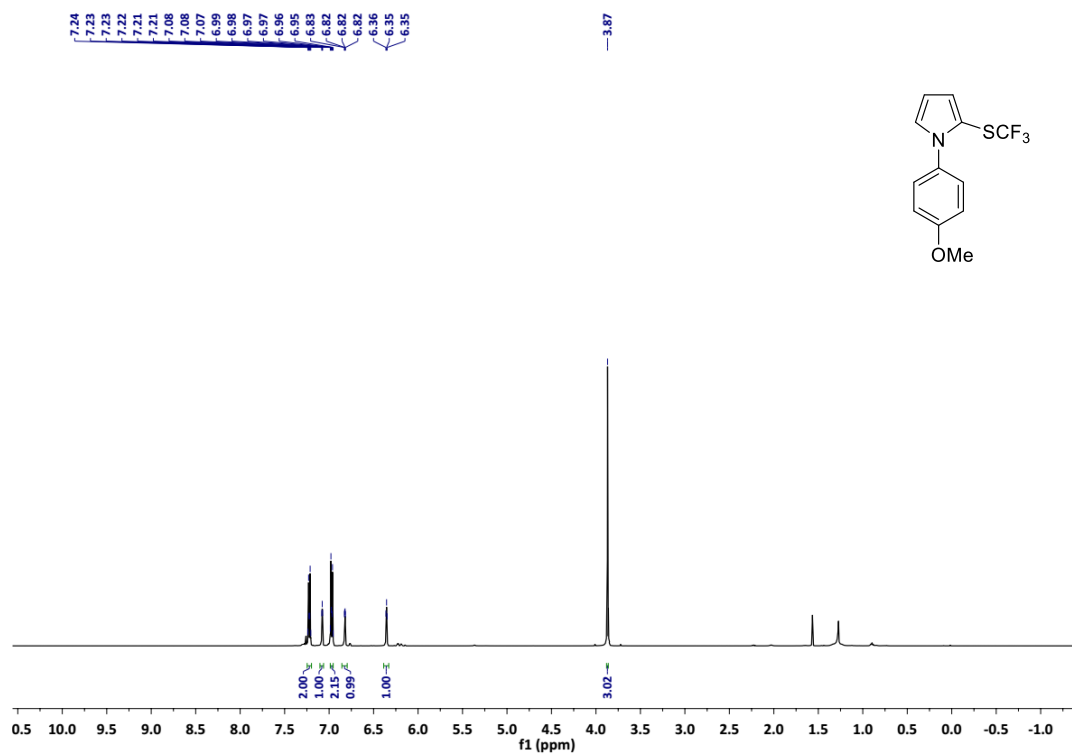

$^1\text{H}$  NMR spectrum (500 MHz,  $\text{CDCl}_3$ ) of **6b**

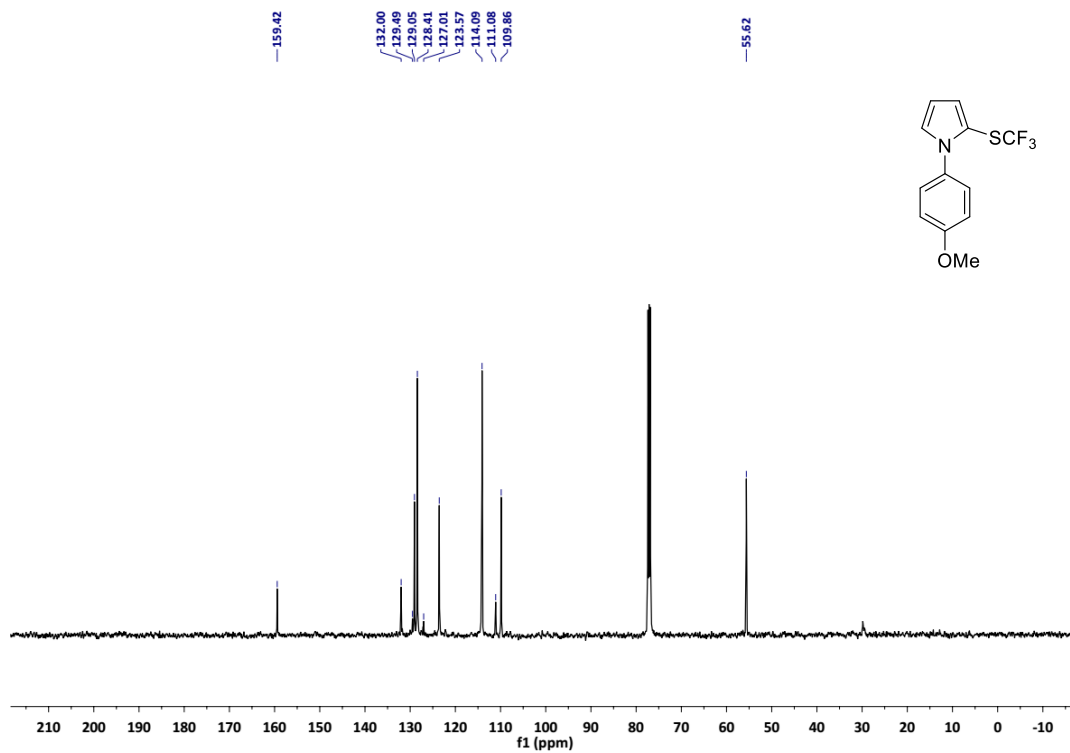

<sup>13</sup>C NMR spectrum (125 MHz, CDCl<sub>3</sub>) of **6b**

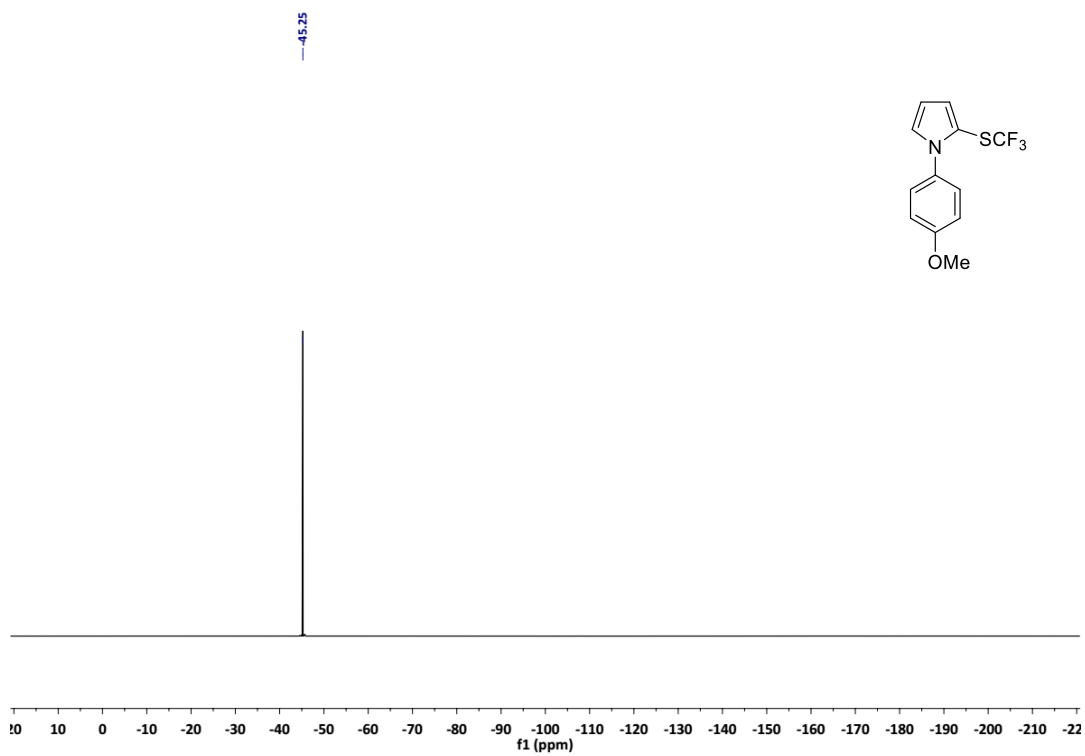

<sup>19</sup>F NMR spectrum (470 MHz, CDCl<sub>3</sub>) of **6b**

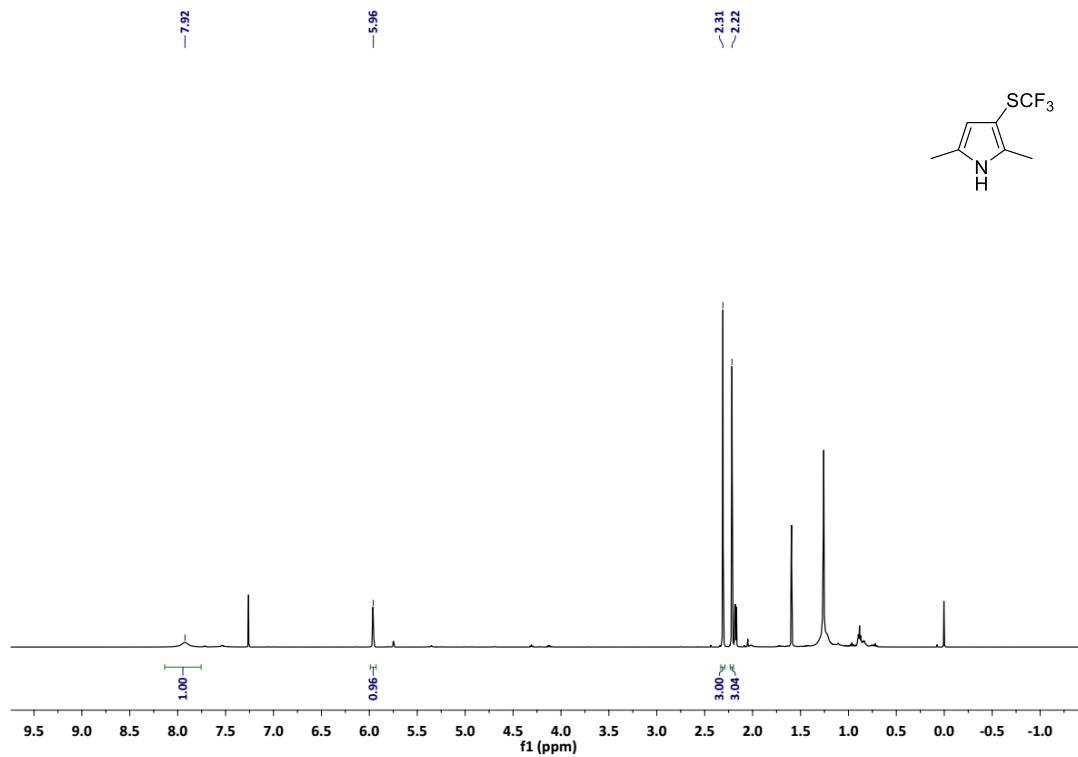

<sup>1</sup>H NMR spectrum (500 MHz, CDCl<sub>3</sub>) of **6c**

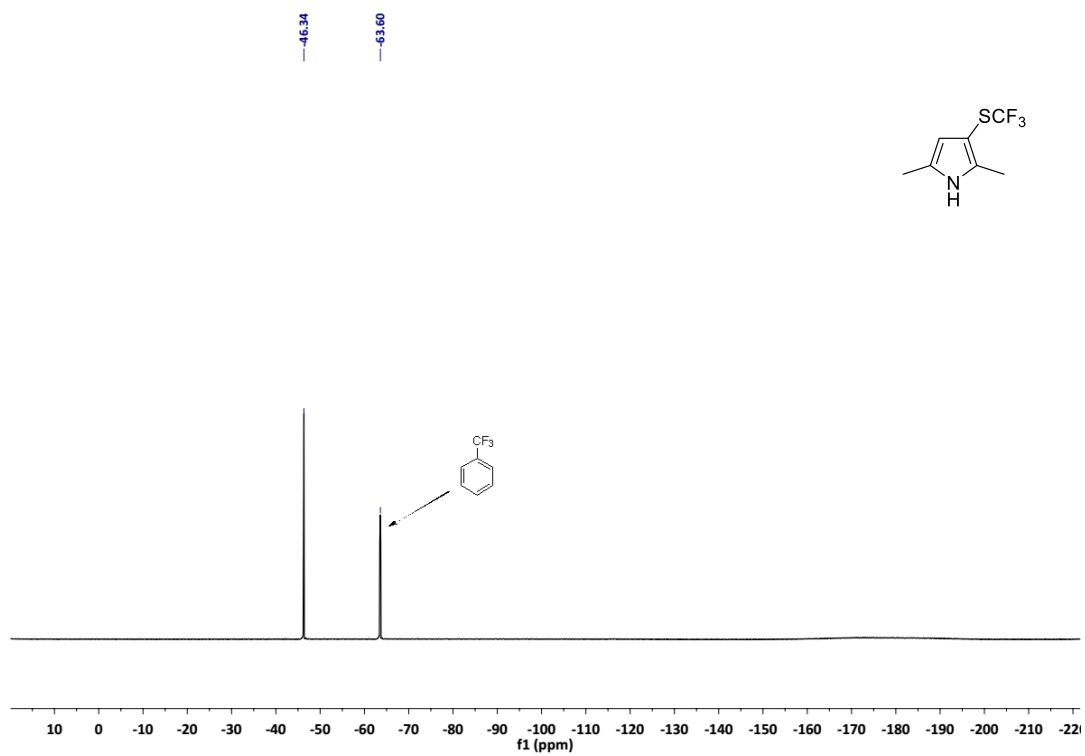

<sup>19</sup>F NMR spectrum (470 MHz, CDCl<sub>3</sub>) of **6c**

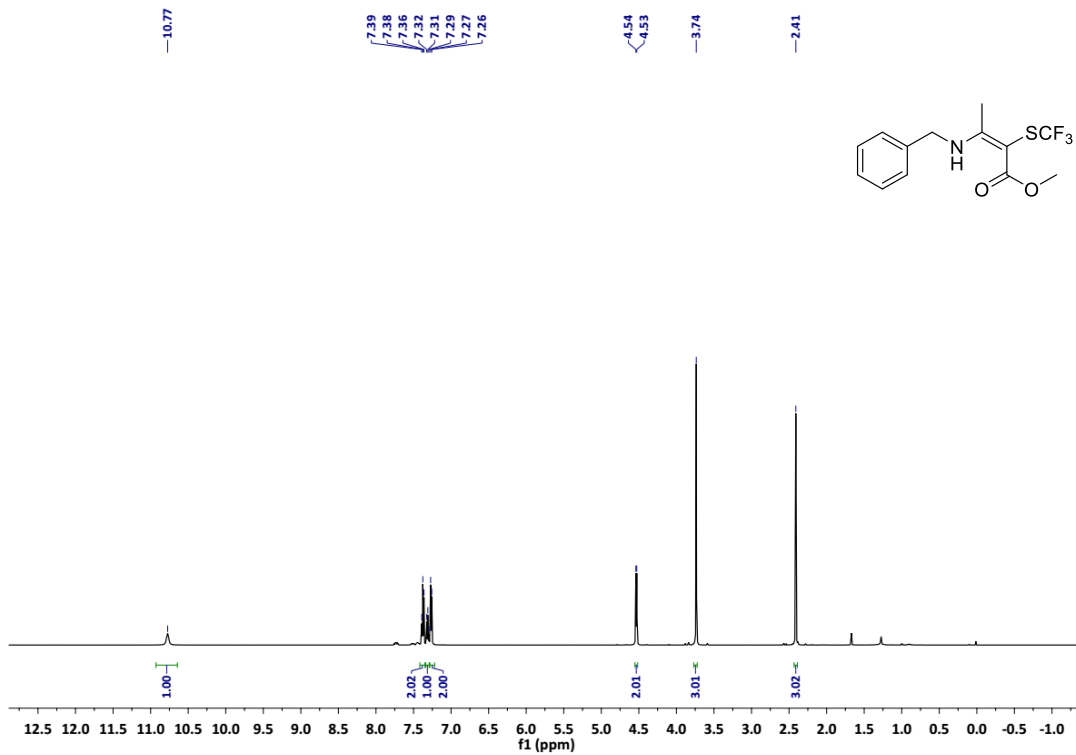

$^1\text{H}$  NMR spectrum (500 MHz,  $\text{CDCl}_3$ ) of **7a**

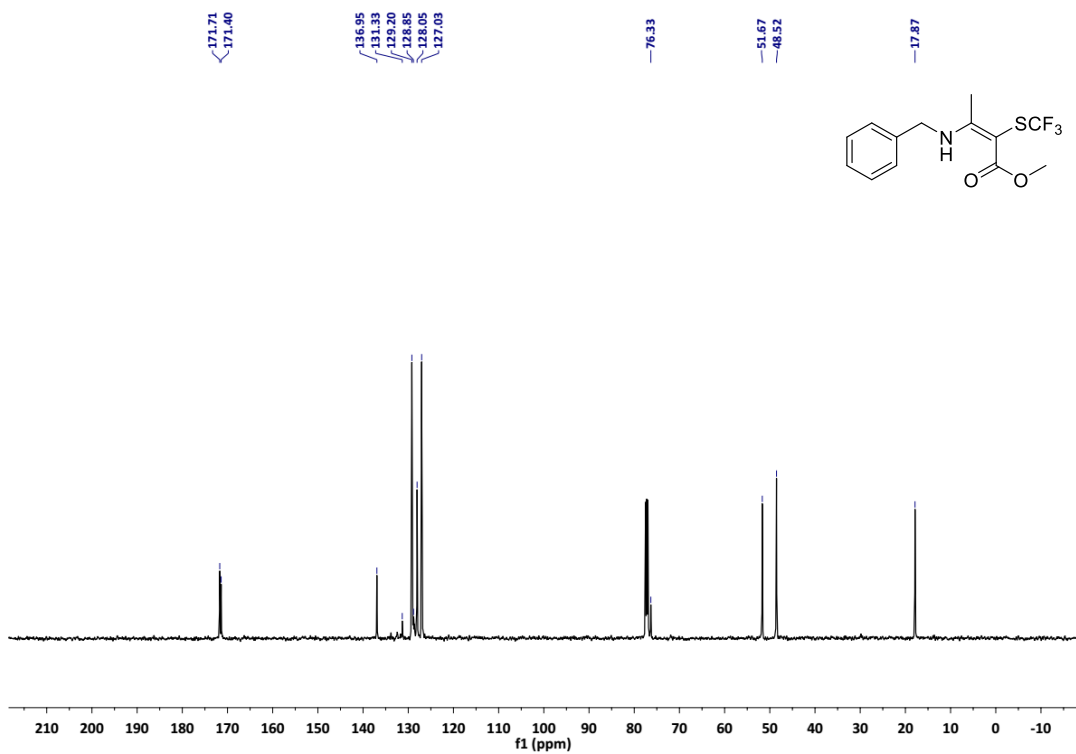

$^{13}\text{C}$  NMR spectrum (125 MHz,  $\text{CDCl}_3$ ) of **7a**

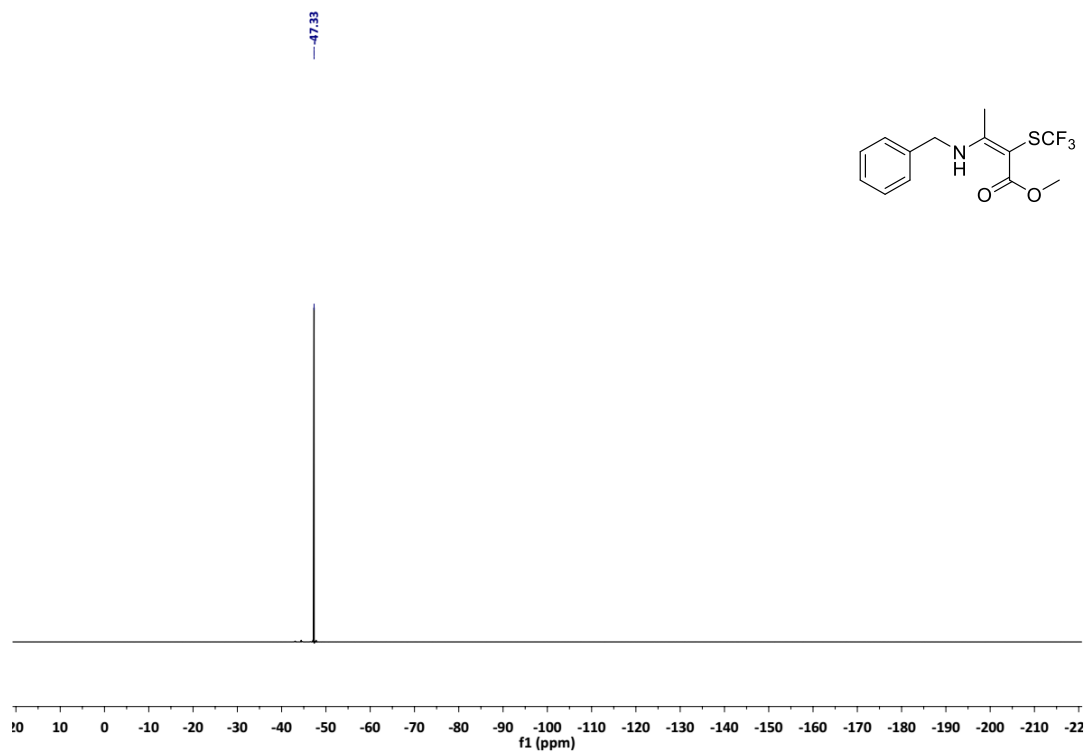

$^{19}\text{F}$  NMR spectrum (470 MHz,  $\text{CDCl}_3$ ) of **7a**

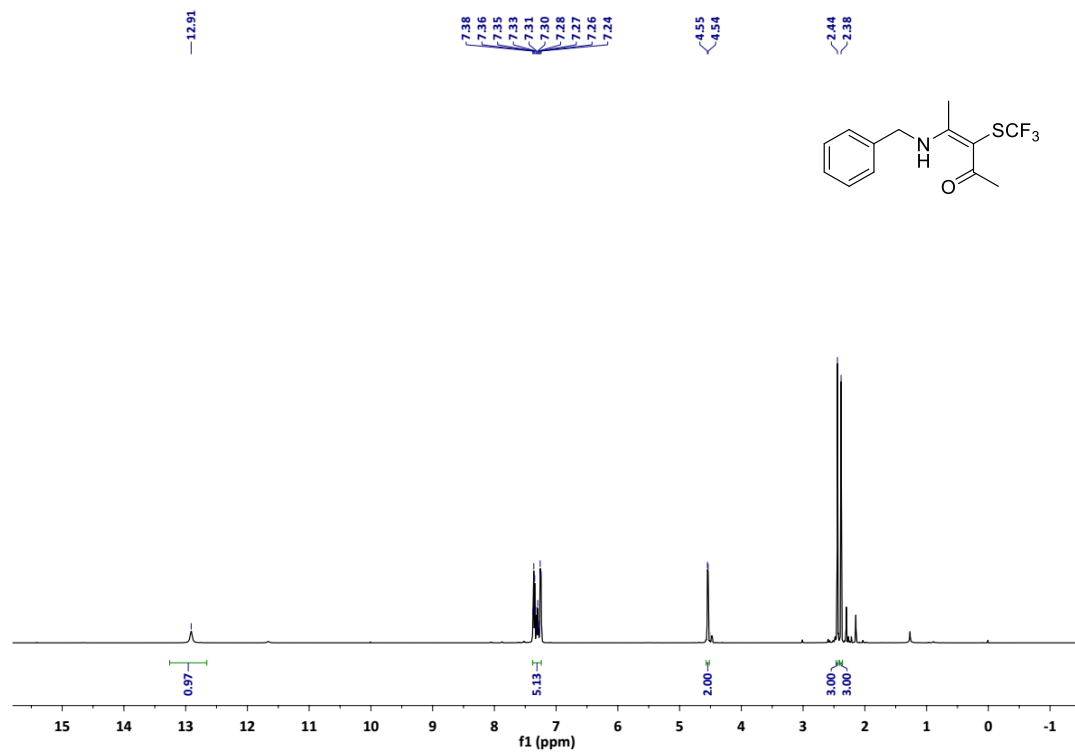

$^1\text{H}$  NMR spectrum (500 MHz,  $\text{CDCl}_3$ ) of **7b**



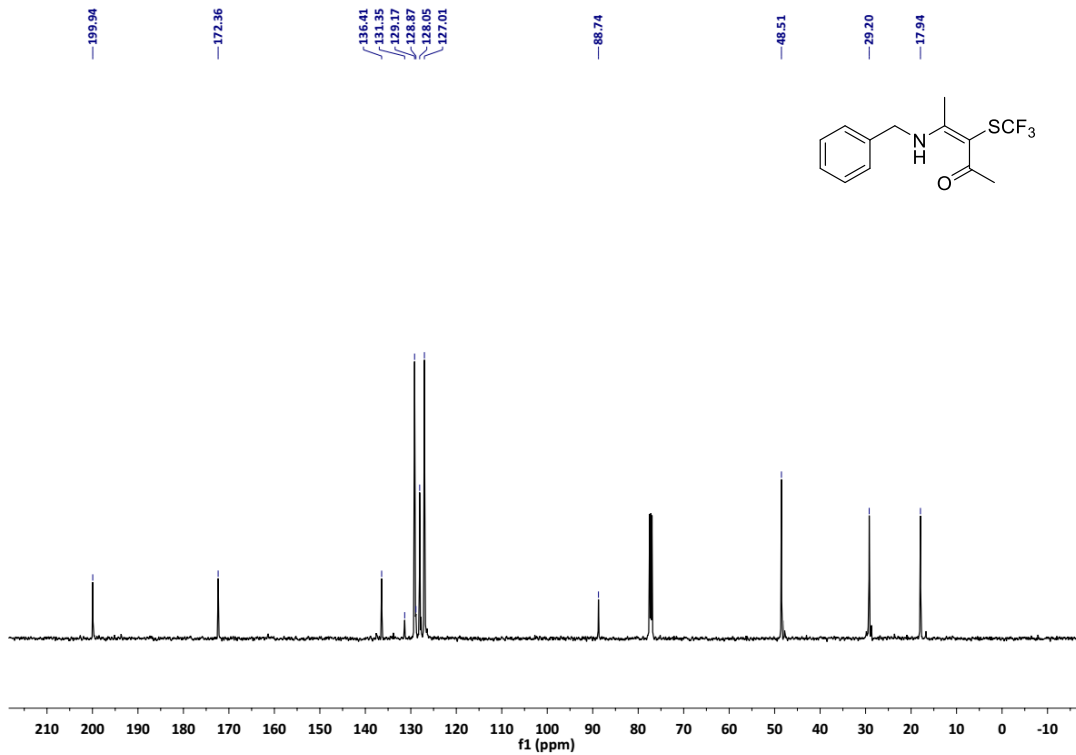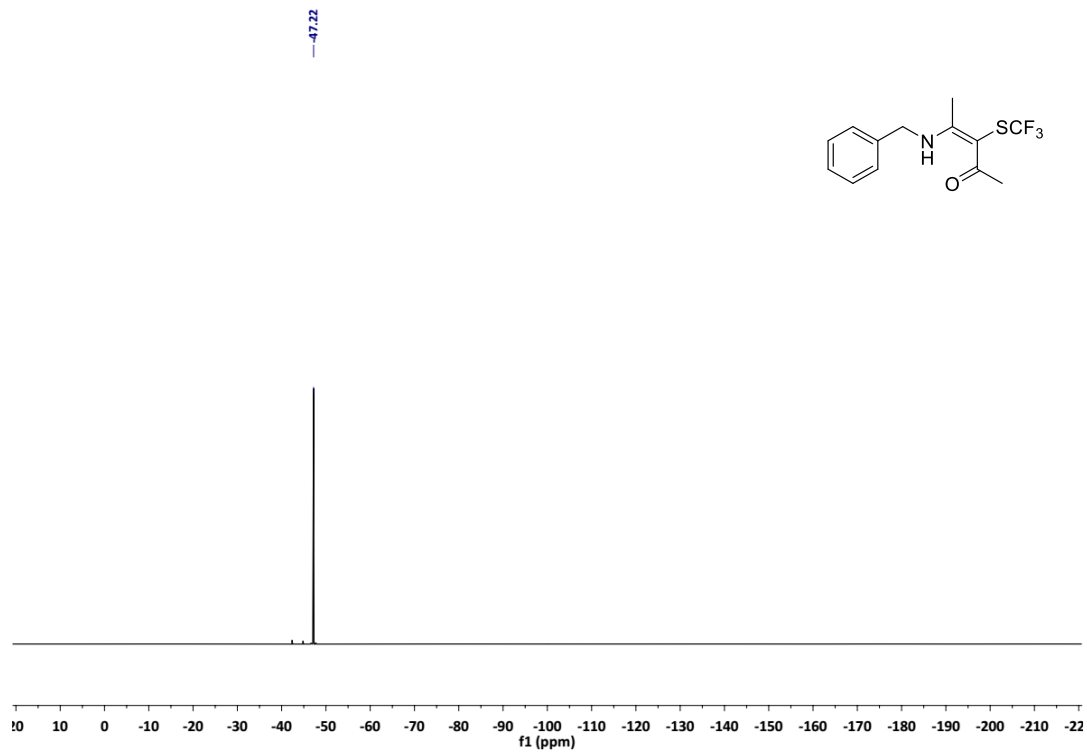

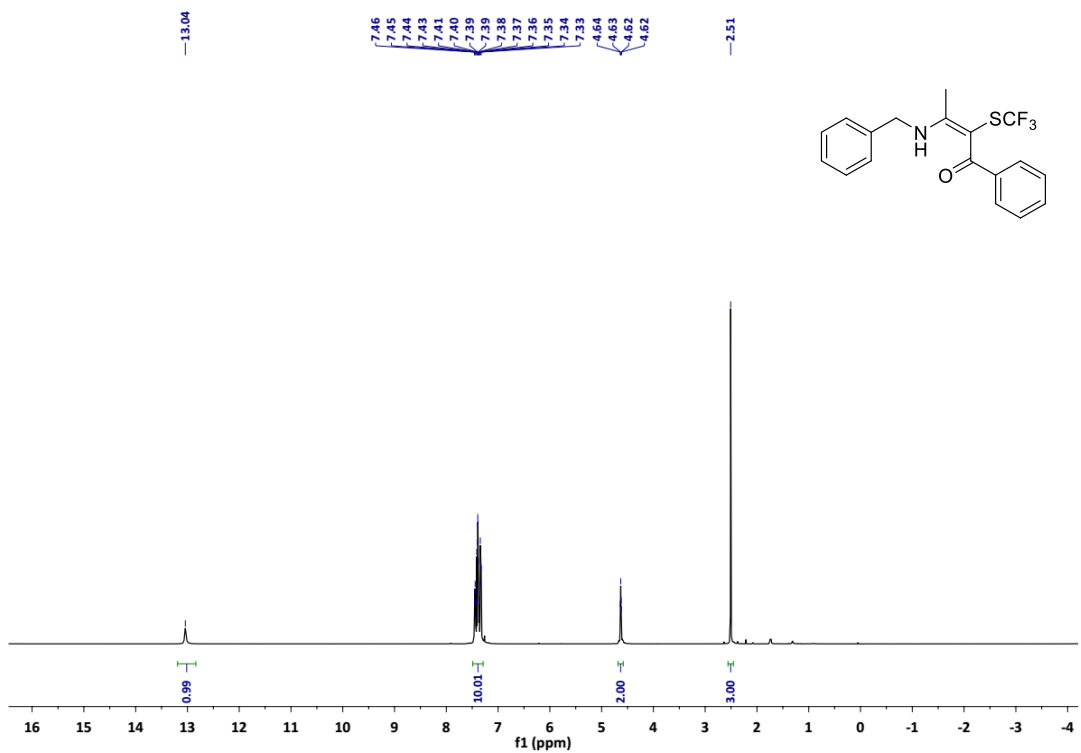

$^1\text{H}$  NMR spectrum (500 MHz,  $\text{CDCl}_3$ ) of **7c**

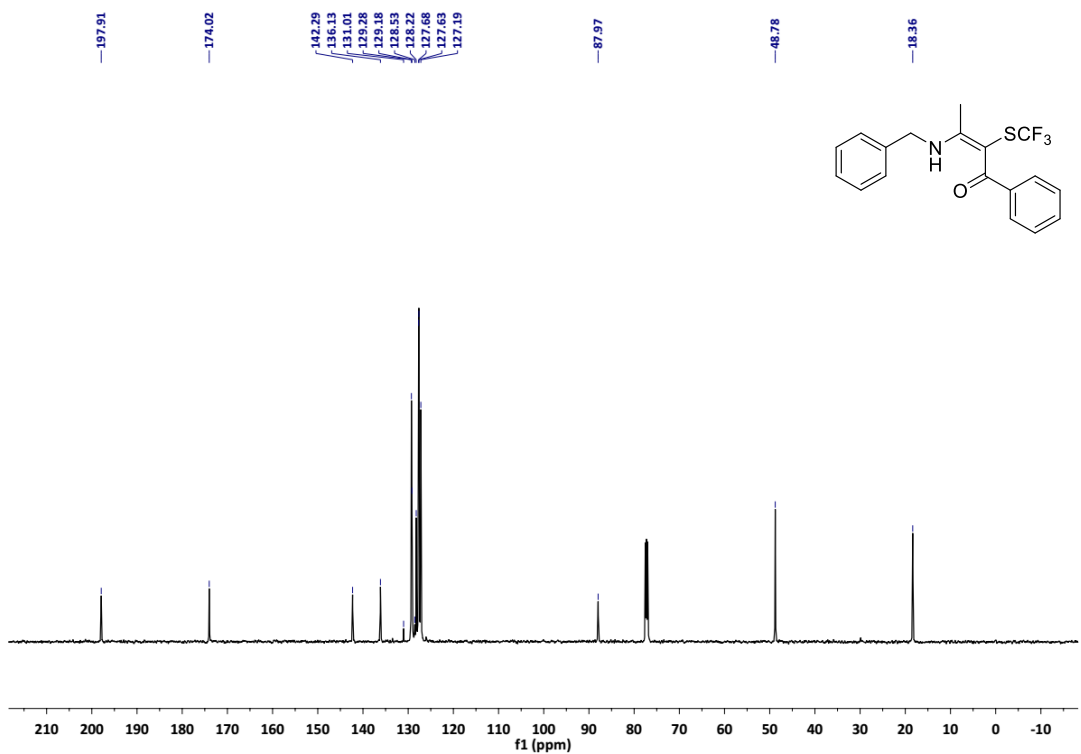

$^{13}\text{C}$  NMR spectrum (125 MHz,  $\text{CDCl}_3$ ) of **7c**

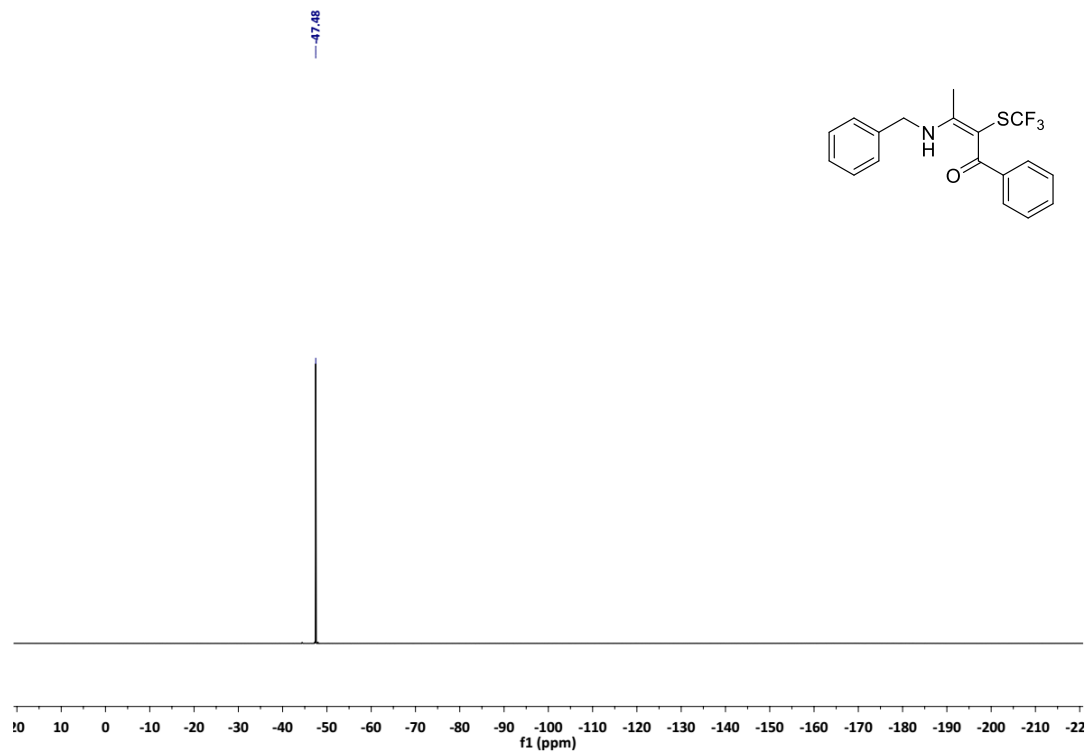

$^{19}\text{F}$  NMR spectrum (470 MHz,  $\text{CDCl}_3$ ) of **7c**

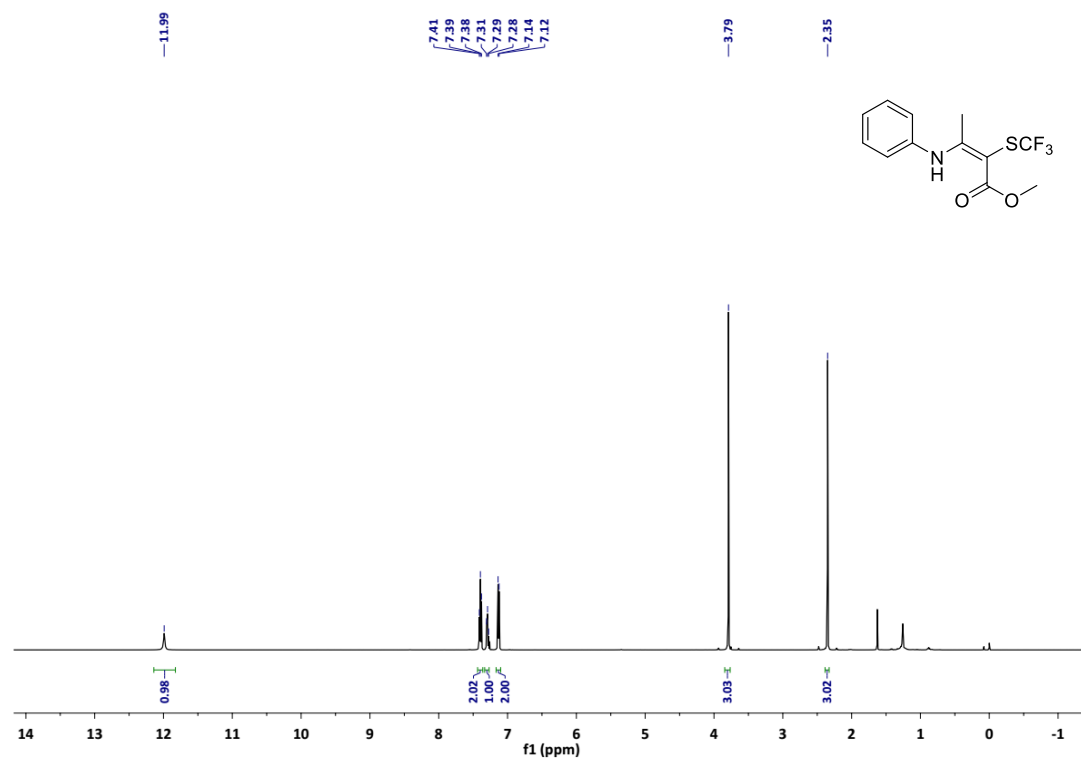

$^1\text{H}$  NMR spectrum (500 MHz,  $\text{CDCl}_3$ ) of **7d**

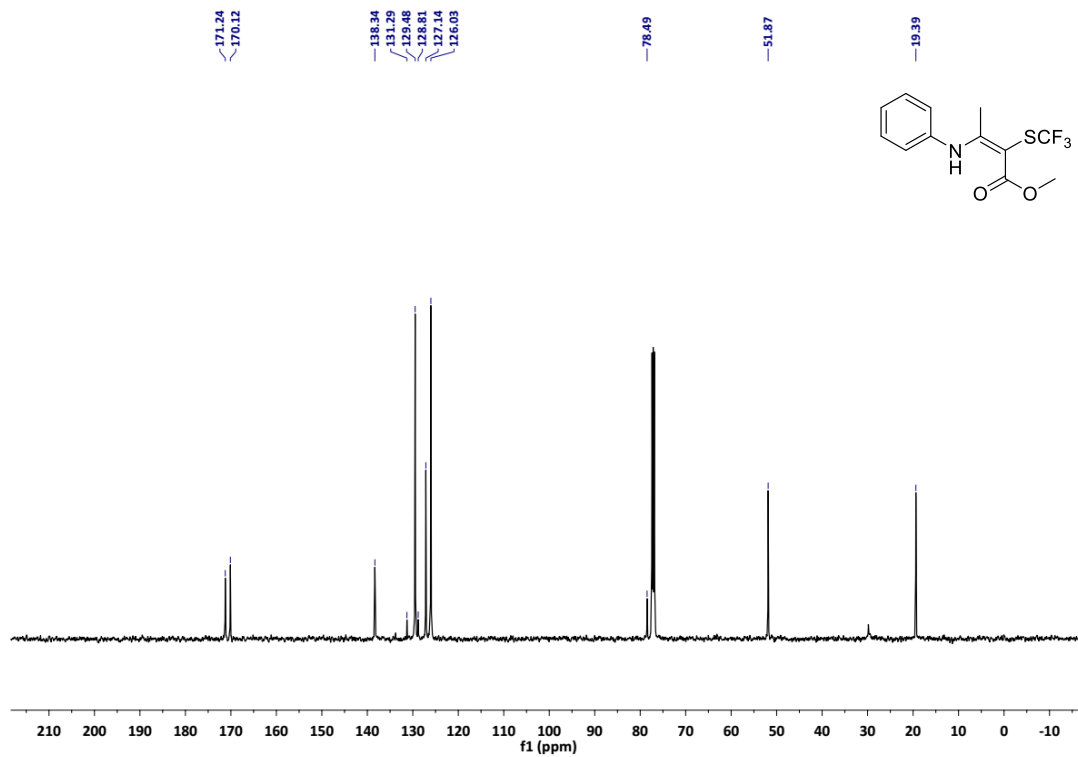

<sup>13</sup>C NMR spectrum (125 MHz, CDCl<sub>3</sub>) of **7d**

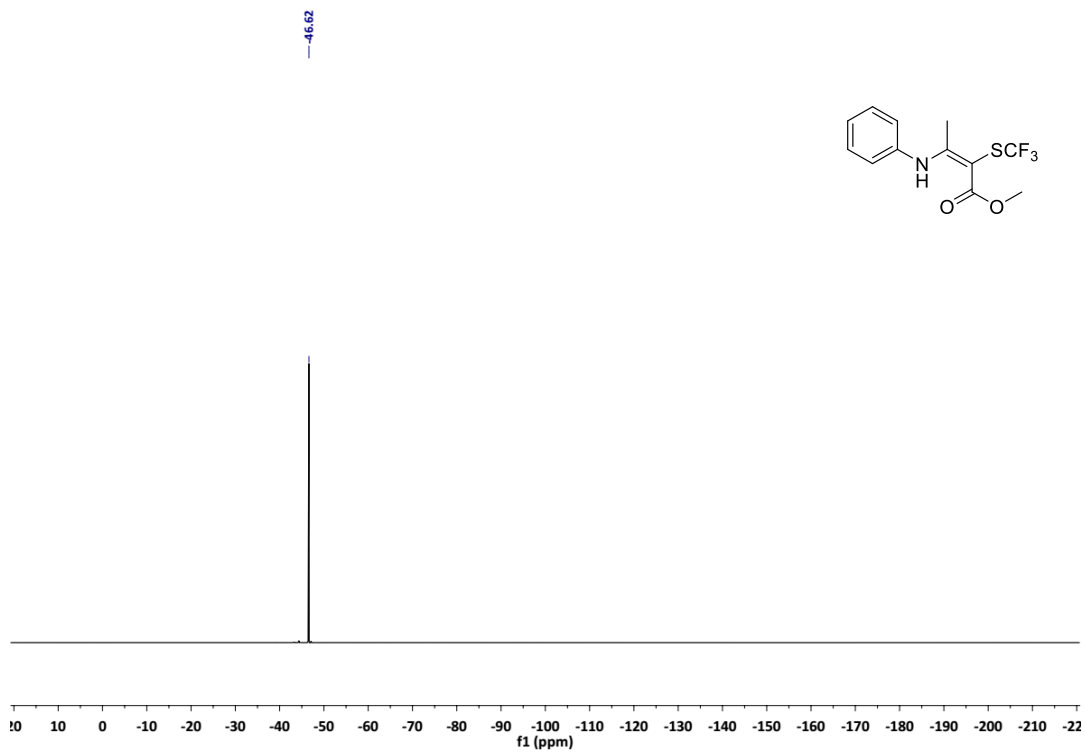

<sup>19</sup>F NMR spectrum (470 MHz, CDCl<sub>3</sub>) of **7d**

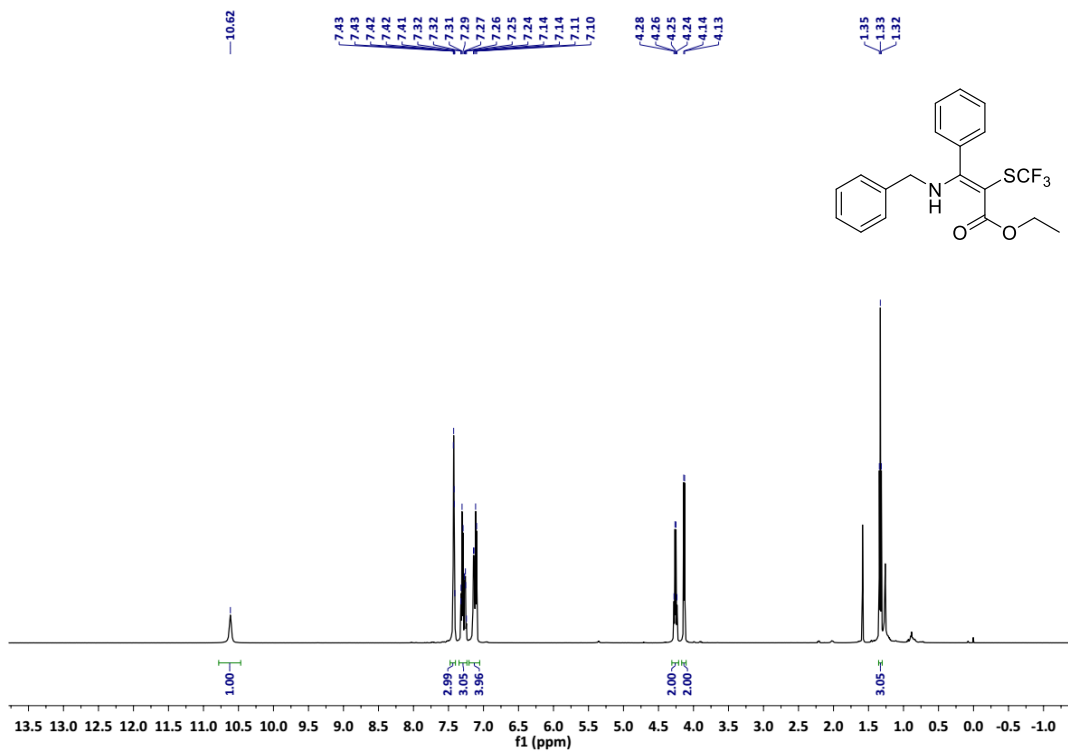

<sup>1</sup>H NMR spectrum (500 MHz, CDCl<sub>3</sub>) of **7e**

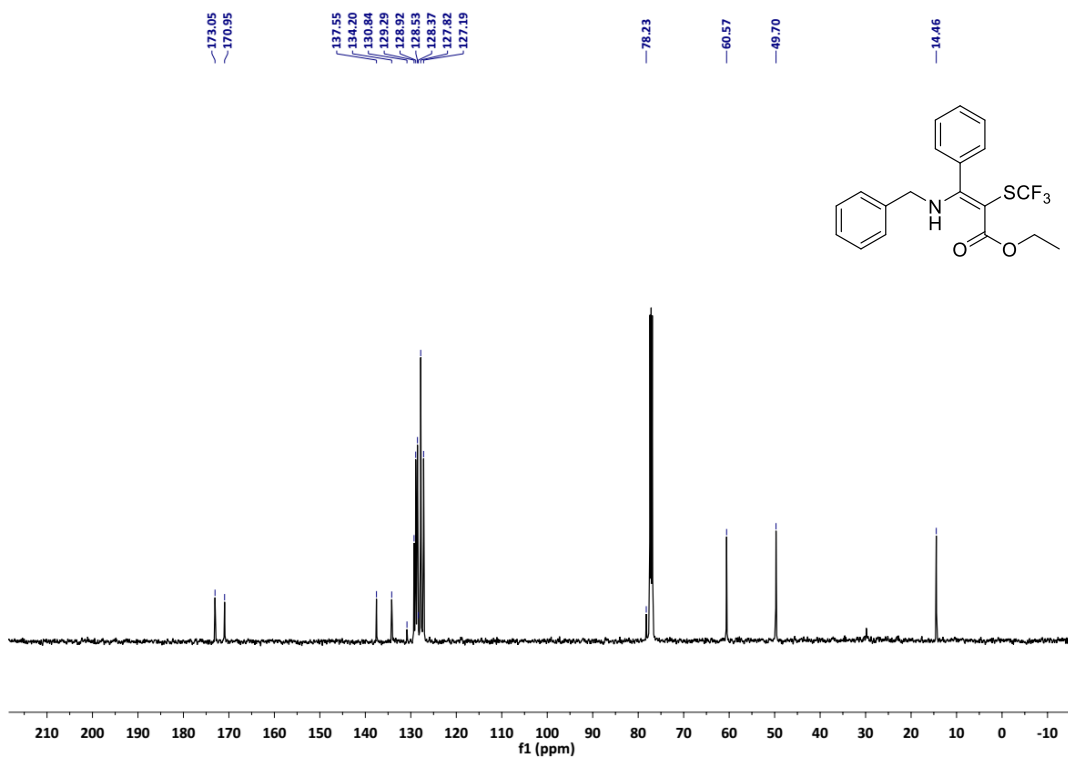

<sup>13</sup>C NMR spectrum (125 MHz, CDCl<sub>3</sub>) of **7e**

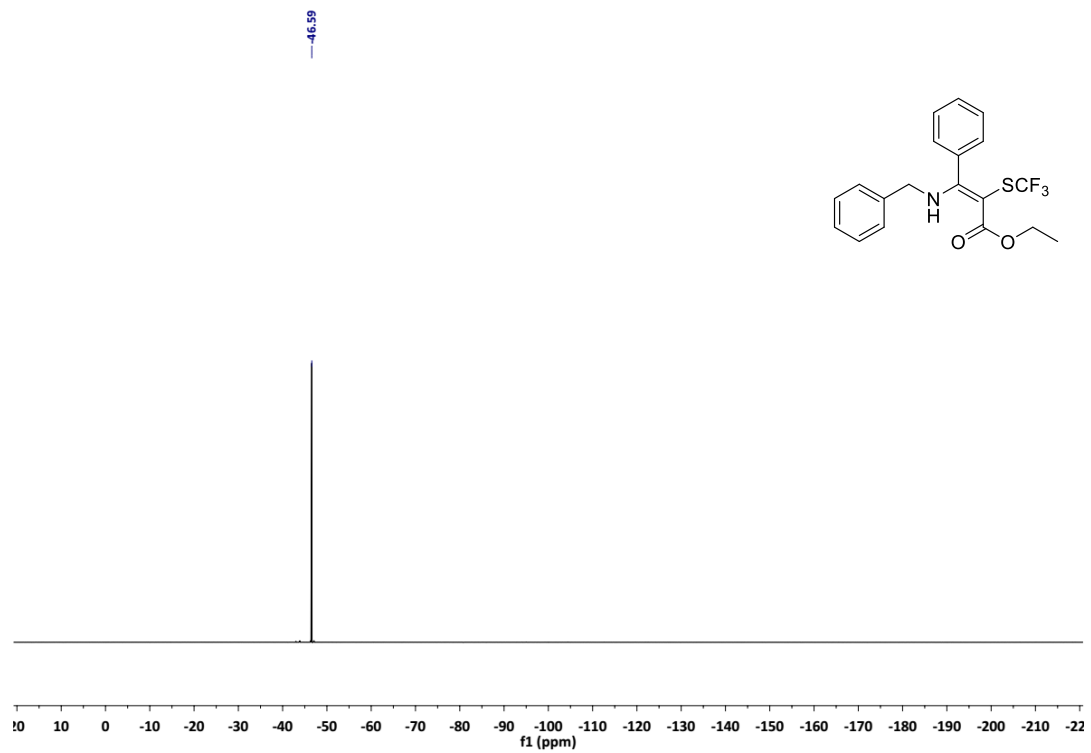

$^{19}\text{F}$  NMR spectrum (470 MHz,  $\text{CDCl}_3$ ) of **7e**
